# Supplementary material for: Intra-Host Co-Existing Strains of SARS-CoV-2 Reference Genome Uncovered by Exhaustive Computational Search
Source: MDPI journal article supplement (doi:10.3390/v15051065), 2023-04-26
Supplement: s1 [file s1]

## 1. Supplemental Material

### 1.1. Tables

**Table S1.** Verified substituted bases from the discovered strain 1 from SRR11092062, a “-” sign means the base is deleted.

| Position | Bases in Reference Strain | Bases in WH Discovered Strain 1 | Frequency | Segment Length | Change Status  |
|----------|---------------------------|---------------------------------|-----------|----------------|----------------|
| 348      | T                         | C                               | 1         | 156            | non-synonymous |
| 565      | T                         | C                               | 5         | 0              | synonymous     |
| 1645     | C                         | G                               | 1         | 54             | non-synonymous |
| 1804     | A                         | T                               | 2         | 66             | non-synonymous |
| 2248     | T                         | A                               | 2         | 0              | synonymous     |
| 2249     | G                         | A                               | 2         | 0              | non-synonymous |
| 2251     | A                         | T                               | 2         | 0              | non-synonymous |
| 2253     | A                         | G                               | 2         | 0              | non-synonymous |
| 2254     | A                         | G                               | 2         | 0              | non-synonymous |
| 2450     | C                         | A                               | 2         | 149            | non-synonymous |
| 2451     | T                         | A                               | 2         | 1              | non-synonymous |
| 2452     | A                         | G                               | 2         | 1              | non-synonymous |
| 2453     | C                         | T                               | 2         | 1              | non-synonymous |
| 2454     | T                         | C                               | 2         | 1              | non-synonymous |
| 2455     | C                         | G                               | 2         | 0              | non-synonymous |
| 2456     | A                         | G                               | 2         | 0              | non-synonymous |
| 2457     | T                         | A                               | 2         | 0              | non-synonymous |
| 2458     | G                         | T                               | 2         | 0              | non-synonymous |
| 2460     | C                         | G                               | 2         | 2              | non-synonymous |
| 2462     | C                         | A                               | 2         | 0              | non-synonymous |
| 2463     | T                         | G                               | 2         | 0              | non-synonymous |
| 3264     | C                         | T                               | 2         | 0              | non-synonymous |
| 3625     | A                         | G                               | 4         | 176            | synonymous     |
| 3784     | C                         | T                               | 3         | 0              | synonymous     |
| 3912     | C                         | T                               | 2         | 0              | non-synonymous |
| 4288     | G                         | T                               | 2         | 0              | non-synonymous |
| 5091     | C                         | T                               | 2         | 0              | non-synonymous |
| 6119     | T                         | C                               | 2         | 0              | non-synonymous |
| 6120     | C                         | T                               | 2         | 0              | non-synonymous |
| 6121     | A                         | C                               | 2         | 0              | non-synonymous |
| 6122     | A                         | C                               | 2         | 1              | synonymous     |
| 6125     | G                         | C                               | 2         | 0              | non-synonymous |
| 6126     | A                         | T                               | 2         | 0              | non-synonymous |
| 6127     | G                         | T                               | 2         | 0              | non-synonymous |
| 6270     | C                         | A                               | 2         | 0              | non-synonymous |
| 6273     | A                         | C                               | 2         | 0              | non-synonymous |
| 6274     | T                         | G                               | 2         | 0              | non-synonymous |

**Table S1. Cont.**

| Position | Bases in Reference Strain | Bases in WH Discovered Strain 1 | Frequency | Segment Length | Change Status  |
|----------|---------------------------|---------------------------------|-----------|----------------|----------------|
| 6275     | A                         | G                               | 2         | 0              | non-synonymous |
| 6277     | A                         | T                               | 2         | 0              | non-synonymous |
| 7241     | G                         | C                               | 3         | 17             | non-synonymous |
| 7242     | A                         | C                               | 3         | 1              | non-synonymous |
| 7244     | T                         | C                               | 3         | 1              | non-synonymous |
| 7245     | G                         | T                               | 3         | 2              | non-synonymous |
| 7246     | G                         | T                               | 3         | 1              | non-synonymous |
| 7247     | T                         | G                               | 3         | 1              | non-synonymous |
| 7248     | T                         | G                               | 3         | 1              | non-synonymous |
| 7249     | T                         | C                               | 3         | 1              | non-synonymous |
| 7250     | T                         | C                               | 3         | 1              | synonymous     |
| 7252     | G                         | C                               | 3         | 2              | synonymous     |
| 7253     | G                         | C                               | 3         | 2              | non-synonymous |
| 7254     | C                         | G                               | 3         | 3              | non-synonymous |
| 7256     | T                         | C                               | 3         | 1              | non-synonymous |
| 7257     | A                         | T                               | 3         | 0              | non-synonymous |
| 7930     | A                         | G                               | 2         | 0              | synonymous     |
| 7933     | A                         | G                               | 2         | 4              | synonymous     |
| 7935     | C                         | A                               | 2         | 2              | non-synonymous |
| 7936     | G                         | T                               | 2         | 1              | non-synonymous |
| 7937     | T                         | C                               | 2         | 1              | non-synonymous |
| 7938     | C                         | G                               | 2         | 1              | non-synonymous |
| 8173     | A                         | G                               | 2         | 24             | synonymous     |
| 8174     | G                         | C                               | 2         | 1              | non-synonymous |
| 8175     | C                         | T                               | 2         | 2              | non-synonymous |
| 8177     | C                         | G                               | 2         | 3              | non-synonymous |
| 8179     | G                         | C                               | 2         | 3              | non-synonymous |
| 8181     | A                         | T                               | 2         | 0              | non-synonymous |
| 8182     | A                         | C                               | 2         | 2              | non-synonymous |
| 8183     | G                         | C                               | 2         | 0              | non-synonymous |
| 8185     | G                         | A                               | 2         | 0              | non-synonymous |
| 8186     | T                         | C                               | 2         | 0              | non-synonymous |
| 9167     | T                         | A                               | 3         | 161            | non-synonymous |
| 10,009   | T                         | A                               | 2         | 0              | synonymous     |
| 10,451   | A                         | G                               | 12        | 179            | non-synonymous |
| 10,933   | T                         | -                               | 2         | 0              | non-synonymous |
| 12506    | A                         | -                               | 2         | 0              | non-synonymous |
| 12,847   | T                         | A                               | 2         | 118            | synonymous     |
| 13,529   | T                         | C                               | 2         | 0              | non-synonymous |
| 13,927   | T                         | C                               | 3         | 0              | synonymous     |

Table S1. *Cont.*

| Position | Bases in Reference Strain | Bases in WH Discovered Strain 1 | Frequency | Segment Length | Change Status  |
|----------|---------------------------|---------------------------------|-----------|----------------|----------------|
| 15,060   | T                         | C                               | 2         | 0              | non-synonymous |
| 15,771   | T                         | C                               | 3         | 150            | non-synonymous |
| 15,957   | G                         | A                               | 2         | 137            | non-synonymous |
| 16,333   | C                         | A                               | 2         | 0              | synonymous     |
| 16,335   | T                         | G                               | 2         | 0              | non-synonymous |
| 16,757   | C                         | A                               | 2         | 51             | non-synonymous |
| 16,759   | C                         | G                               | 2         | 2              | non-synonymous |
| 16,760   | C                         | T                               | 2         | 1              | non-synonymous |
| 16,761   | A                         | C                               | 2         | 1              | non-synonymous |
| 16,762   | C                         | G                               | 2         | 3              | non-synonymous |
| 16,763   | T                         | G                               | 2         | 1              | non-synonymous |
| 16,764   | T                         | A                               | 2         | 1              | non-synonymous |
| 16,765   | A                         | T                               | 2         | 1              | non-synonymous |
| 16,766   | A                         | C                               | 2         | 1              | non-synonymous |
| 16,767   | C                         | G                               | 2         | 0              | non-synonymous |
| 17,458   | C                         | A                               | 3         | 0              | non-synonymous |
| 17,459   | C                         | G                               | 3         | 1              | non-synonymous |
| 17,460   | A                         | T                               | 3         | 0              | non-synonymous |
| 17,650   | T                         | G                               | 2         | 175            | synonymous     |
| 17,825   | C                         | T                               | 7         | 1              | non-synonymous |
| 18,022   | A                         | G                               | 3         | 0              | synonymous     |
| 18,024   | T                         | C                               | 3         | 0              | non-synonymous |
| 18,025   | G                         | T                               | 3         | 0              | non-synonymous |
| 18,597   | G                         | A                               | 2         | 0              | non-synonymous |
| 19,050   | T                         | A                               | 2         | 9              | non-synonymous |
| 19,817   | T                         | A                               | 2         | 80             | non-synonymous |
| 19,819   | C                         | G                               | 2         | 0              | non-synonymous |
| 19,820   | C                         | T                               | 2         | 0              | non-synonymous |
| 19,821   | A                         | C                               | 2         | 1              | non-synonymous |
| 19,823   | A                         | G                               | 2         | 2              | non-synonymous |
| 19,824   | G                         | A                               | 2         | 0              | non-synonymous |
| 19,825   | G                         | T                               | 2         | 1              | non-synonymous |
| 19,826   | T                         | C                               | 2         | 0              | non-synonymous |
| 19,828   | A                         | T                               | 2         | 3              | non-synonymous |
| 19,830   | A                         | G                               | 2         | 0              | non-synonymous |
| 19,831   | A                         | C                               | 2         | 0              | non-synonymous |
| 19,832   | T                         | C                               | 2         | 3              | non-synonymous |
| 20,136   | A                         | C                               | 3         | 0              | non-synonymous |
| 21,587   | C                         | T                               | 2         | 0              | non-synonymous |
| 22,114   | T                         | G                               | 2         | 0              | synonymous     |

Table S1. *Cont.*

| Position | Bases in Reference Strain | Bases in WH Discovered Strain 1 | Frequency | Segment Length | Change Status  |
|----------|---------------------------|---------------------------------|-----------|----------------|----------------|
| 22,274   | T                         | C                               | 2         | 0              | non-synonymous |
| 22,990   | T                         | A                               | 3         | 0              | synonymous     |
| 23,364   | G                         | A                               | 2         | 0              | non-synonymous |
| 23,366   | A                         | G                               | 2         | 0              | non-synonymous |
| 23,367   | C                         | T                               | 2         | 0              | non-synonymous |
| 23,368   | A                         | C                               | 2         | 0              | non-synonymous |
| 23,369   | A                         | G                               | 2         | 0              | non-synonymous |
| 23,605   | T                         | C                               | 4         | 206            | synonymous     |
| 23,859   | C                         | G                               | 1         | 56             | non-synonymous |
| 24,108   | T                         | A                               | 1         | 177            | non-synonymous |
| 24,259   | T                         | A                               | 1         | 155            | synonymous     |
| 24,653   | G                         | C                               | 2         | 0              | non-synonymous |
| 24,654   | A                         | T                               | 2         | 1              | non-synonymous |
| 24,655   | G                         | C                               | 2         | 0              | non-synonymous |
| 24,656   | T                         | C                               | 2         | 0              | non-synonymous |
| 24,658   | T                         | A                               | 2         | 0              | non-synonymous |
| 24,659   | G                         | C                               | 2         | 0              | non-synonymous |
| 24,661   | A                         | T                               | 2         | 0              | non-synonymous |
| 24,804   | T                         | A                               | 2         | 0              | non-synonymous |
| 24,805   | T                         | G                               | 2         | 2              | non-synonymous |
| 24,807   | G                         | C                               | 2         | 2              | non-synonymous |
| 24,808   | T                         | G                               | 2         | 0              | non-synonymous |
| 24,809   | C                         | G                               | 2         | 0              | non-synonymous |
| 25,046   | C                         | G                               | 2         | 0              | non-synonymous |
| 25,518   | T                         | C                               | 2         | 3              | synonymous     |
| 25,519   | T                         | C                               | 2         | 0              | non-synonymous |
| 25,522   | G                         | C                               | 2         | 3              | non-synonymous |
| 25,525   | T                         | C                               | 2         | 0              | non-synonymous |
| 25,526   | G                         | T                               | 2         | 1              | non-synonymous |
| 25,527   | G                         | T                               | 2         | 0              | non-synonymous |
| 25,669   | C                         | A                               | 2         | 1              | non-synonymous |
| 25,670   | A                         | G                               | 2         | 0              | non-synonymous |
| 25,671   | C                         | T                               | 2         | 0              | non-synonymous |
| 25,673   | T                         | G                               | 2         | 0              | non-synonymous |
| 25,674   | T                         | G                               | 2         | 0              | non-synonymous |
| 25,675   | T                         | A                               | 2         | 0              | non-synonymous |
| 25,677   | G                         | C                               | 2         | 2              | non-synonymous |
| 26,354   | T                         | A                               | 1         | 163            | non-synonymous |
| 26,836   | G                         | T                               | 2         | 40             | non-synonymous |
| 26,838   | A                         | G                               | 2         | 0              | non-synonymous |

**Table S1. Cont.**

| Position | Bases in Reference Strain | Bases in WH Discovered Strain 1 | Frequency | Segment Length | Change Status  |
|----------|---------------------------|---------------------------------|-----------|----------------|----------------|
| 26,839   | C                         | G                               | 2         | 1              | non-synonymous |
| 26,840   | G                         | C                               | 2         | 2              | non-synonymous |
| 26,842   | G                         | T                               | 2         | 2              | non-synonymous |
| 26,843   | T                         | C                               | 2         | 0              | non-synonymous |
| 26,844   | T                         | C                               | 2         | 1              | non-synonymous |
| 26,845   | C                         | G                               | 2         | 0              | non-synonymous |
| 26,846   | C                         | A                               | 2         | 1              | non-synonymous |
| 26,847   | A                         | C                               | 2         | 0              | non-synonymous |
| 26,849   | G                         | T                               | 2         | 5              | non-synonymous |
| 27,017   | T                         | A                               | 4         | 158            | synonymous     |
| 27,372   | A                         | G                               | 3         | 0              | synonymous     |
| 27,885   | T                         | G                               | 3         | 2              | non-synonymous |
| 28,293   | A                         | G                               | 3         | 151            | non-synonymous |
| 28,510   | T                         | C                               | 3         | 1              | synonymous     |
| 28,777   | A                         | C                               | 2         | 0              | synonymous     |
| 29,066   | A                         | C                               | 3         | 0              | non-synonymous |
| 29,456   | C                         | T                               | 3         | 0              | non-synonymous |
| 29,840   | T                         | A                               | 3         | 142            | synonymous     |
| 29,843   | G                         | C                               | 3         | 3              | synonymous     |
| 29,844   | A                         | G                               | 3         | 162            | synonymous     |
| 29,845   | T                         | G                               | 3         | 162            | synonymous     |
| 29,846   | T                         | A                               | 3         | 1              | synonymous     |

**Table S2.** Verified substituted bases from discovered strain 2 of SRR11092062, a “-” sign means the base is deleted.

| Position | Bases in Reference Strain | Bases in WH Discovered Strain 2 | Frequency | Segment Length | Change Status  |
|----------|---------------------------|---------------------------------|-----------|----------------|----------------|
| 3625     | A                         | C                               | 3         | 153            | synonymous     |
| 4291     | A                         | T                               | 2         | 0              | synonymous     |
| 6160     | T                         | A                               | 2         | 0              | synonymous     |
| 6161     | G                         | A                               | 2         | 0              | non-synonymous |
| 6162     | A                         | G                               | 2         | 0              | non-synonymous |
| 6163     | T                         | A                               | 2         | 11             | non-synonymous |
| 6164     | G                         | C                               | 2         | 11             | non-synonymous |
| 6165     | T                         | C                               | 2         | 11             | non-synonymous |
| 6167     | G                         | C                               | 2         | 11             | non-synonymous |
| 6169     | G                         | T                               | 2         | 11             | non-synonymous |
| 6171     | C                         | G                               | 2         | 1              | non-synonymous |
| 6172     | T                         | C                               | 2         | 11             | non-synonymous |

Table S2. *Cont.*

| Position | Bases in Reference Strain | Bases in WH Discovered Strain 2 | Frequency | Segment Length | Change Status  |
|----------|---------------------------|---------------------------------|-----------|----------------|----------------|
| 6173     | A                         | C                               | 2         | 2              | non-synonymous |
| 6175     | T                         | C                               | 2         | 3              | non-synonymous |
| 6176     | G                         | C                               | 2         | 3              | non-synonymous |
| 6177     | A                         | G                               | 2         | 3              | non-synonymous |
| 6178     | T                         | A                               | 2         | 9              | non-synonymous |
| 6179     | T                         | C                               | 2         | 4              | non-synonymous |
| 6180     | A                         | T                               | 2         | 3              | non-synonymous |
| 7305     | T                         | A                               | 2         | 159            | non-synonymous |
| 10,451   | A                         | C                               | 6         | 214            | non-synonymous |
| 13,392   | G                         | T                               | 2         | 56             | non-synonymous |
| 13,950   | T                         | A                               | 2         | 50             | non-synonymous |
| 13,951   | A                         | G                               | 2         | 0              | non-synonymous |
| 13,953   | A                         | C                               | 2         | 2              | non-synonymous |
| 13,954   | T                         | G                               | 2         | 1              | non-synonymous |
| 13,955   | T                         | G                               | 2         | 2              | non-synonymous |
| 13,957   | C                         | T                               | 2         | 0              | non-synonymous |
| 13,958   | G                         | C                               | 2         | 1              | non-synonymous |
| 13,959   | C                         | G                               | 2         | 1              | non-synonymous |
| 13,960   | G                         | T                               | 2         | 1              | non-synonymous |
| 13,961   | T                         | A                               | 2         | 0              | non-synonymous |
| 15,882   | T                         | A                               | 1         | 176            | non-synonymous |
| 16,469   | C                         | A                               | 2         | 129            | non-synonymous |
| 16,470   | C                         | A                               | 2         | 150            | non-synonymous |
| 16,471   | A                         | G                               | 2         | 150            | non-synonymous |
| 16,473   | T                         | C                               | 2         | 1              | non-synonymous |
| 16,474   | A                         | G                               | 2         | 1              | non-synonymous |
| 17,374   | A                         | G                               | 2         | 157            | synonymous     |
| 17,709   | A                         | G                               | 4         | 233            | non-synonymous |
| 17,886   | T                         | C                               | 3         | 153            | non-synonymous |
| 18,108   | A                         | G                               | 2         | 1              | non-synonymous |
| 19,150   | G                         | A                               | 2         | 145            | non-synonymous |
| 19,151   | C                         | A                               | 2         | 1              | non-synonymous |
| 19,152   | C                         | G                               | 2         | 1              | non-synonymous |
| 19,153   | A                         | T                               | 2         | 2              | non-synonymous |
| 19,155   | A                         | G                               | 2         | 2              | non-synonymous |
| 19,156   | C                         | G                               | 2         | 2              | non-synonymous |
| 19,159   | T                         | C                               | 2         | 1              | synonymous     |
| 19,160   | C                         | G                               | 2         | 2              | non-synonymous |
| 19,162   | G                         | A                               | 2         | 3              | non-synonymous |
| 19,163   | A                         | G                               | 2         | 3              | non-synonymous |

Table S2. *Cont.*

| Position | Bases in Reference Strain | Bases in WH Discovered Strain 2 | Frequency | Segment Length | Change Status  |
|----------|---------------------------|---------------------------------|-----------|----------------|----------------|
| 19,165   | A                         | C                               | 2         | 2              | non-synonymous |
| 19,167   | A                         | T                               | 2         | 1              | non-synonymous |
| 19,168   | T                         | G                               | 2         | 3              | non-synonymous |
| 19,171   | A                         | G                               | 2         | 4              | synonymous     |
| 19,172   | C                         | T                               | 2         | 4              | non-synonymous |
| 19,173   | A                         | T                               | 2         | 1              | non-synonymous |
| 19,174   | G                         | C                               | 2         | 0              | non-synonymous |
| 19,175   | A                         | T                               | 2         | 1              | non-synonymous |
| 19,176   | T                         | G                               | 2         | 1              | non-synonymous |
| 19,177   | G                         | T                               | 2         | 0              | non-synonymous |
| 19,896   | T                         | C                               | 2         | 0              | non-synonymous |
| 21,486   | T                         | A                               | 2         | 0              | non-synonymous |
| 21,487   | A                         | C                               | 2         | 0              | non-synonymous |
| 21,488   | A                         | T                               | 2         | 3              | non-synonymous |
| 21,489   | A                         | T                               | 2         | 2              | non-synonymous |
| 21,638   | C                         | A                               | 2         | 143            | non-synonymous |
| 21,639   | C                         | A                               | 2         | 143            | non-synonymous |
| 21,640   | T                         | G                               | 2         | 143            | non-synonymous |
| 21,641   | G                         | T                               | 2         | 143            | non-synonymous |
| 21,643   | A                         | G                               | 2         | 143            | non-synonymous |
| 21,644   | T                         | G                               | 2         | 143            | non-synonymous |
| 22,114   | T                         | C                               | 2         | 160            | synonymous     |
| 23,280   | C                         | T                               | 1         | 52             | non-synonymous |
| 23,281   | T                         | C                               | 1         | 12             | non-synonymous |
| 23,590   | T                         | C                               | 2         | 207            | synonymous     |
| 28,240   | T                         | C                               | 2         | 1              | non-synonymous |
| 28,242   | G                         | T                               | 2         | 1              | non-synonymous |
| 28,243   | T                         | G                               | 2         | 1              | non-synonymous |
| 28,245   | T                         | A                               | 2         | 1              | non-synonymous |
| 28,246   | T                         | G                               | 2         | 2              | non-synonymous |
| 28,248   | G                         | T                               | 2         | 3              | non-synonymous |
| 28,249   | A                         | C                               | 2         | 1              | non-synonymous |
| 28,251   | T                         | G                               | 2         | 1              | non-synonymous |
| 28,253   | C                         | T                               | 2         | 2              | non-synonymous |
| 28,254   | A                         | C                               | 2         | 1              | non-synonymous |
| 29,177   | C                         | T                               | 2         | 0              | non-synonymous |
| 29,377   | T                         | A                               | 2         | 21             | synonymous     |
| 29,542   | A                         | G                               | 2         | 139            | synonymous     |
| 29,543   | G                         | A                               | 2         | 1              | synonymous     |
| 29,544   | A                         | C                               | 2         | 2              | synonymous     |

**Table S2.** *Cont.*

| Position | Bases in Reference Strain | Bases in WH Discovered Strain 2 | Frequency | Segment Length | Change Status |
|----------|---------------------------|---------------------------------|-----------|----------------|---------------|
| 29,546   | C                         | G                               | 2         | 0              | synonymous    |
| 29,547   | A                         | C                               | 2         | 1              | synonymous    |
| 29,548   | C                         | T                               | 2         | 1              | synonymous    |
| 29,549   | A                         | T                               | 2         | 0              | synonymous    |
| 29,550   | C                         | G                               | 2         | 1              | synonymous    |
| 29,551   | A                         | G                               | 2         | 1              | synonymous    |
| 29,552   | A                         | C                               | 2         | 3              | synonymous    |
| 29,553   | G                         | C                               | 2         | 0              | synonymous    |
| 29,554   | G                         | T                               | 2         | 0              | synonymous    |
| 29,556   | A                         | C                               | 2         | 0              | synonymous    |
| 29,559   | T                         | C                               | 2         | 0              | synonymous    |
| 29,560   | G                         | T                               | 2         | 0              | synonymous    |
| 29,561   | G                         | T                               | 2         | 3              | synonymous    |
| 29,724   | C                         | A                               | 2         | 50             | synonymous    |
| 29,725   | A                         | G                               | 2         | 4              | synonymous    |
| 29,727   | T                         | C                               | 2         | 2              | synonymous    |
| 29,728   | T                         | G                               | 2         | 1              | synonymous    |
| 29,729   | T                         | G                               | 2         | 0              | synonymous    |
| 29,730   | C                         | A                               | 2         | 1              | synonymous    |
| 29,731   | A                         | T                               | 2         | 2              | synonymous    |
| 29,733   | C                         | G                               | 2         | 2              | synonymous    |
| 29,734   | G                         | T                               | 2         | 1              | synonymous    |
| 29,737   | G                         | C                               | 2         | 4              | synonymous    |
| 29,739   | C                         | A                               | 2         | 2              | synonymous    |
| 29,740   | A                         | T                               | 2         | 1              | synonymous    |
| 29,741   | C                         | G                               | 2         | 1              | synonymous    |
| 29,742   | G                         | T                               | 2         | 0              | synonymous    |
| 29,745   | G                         | T                               | 2         | 2              | synonymous    |

**Table S3.** Verified substituted bases from the MR discovered strain 1, a “-” sign in original strain means the base is inserted in MR discovered strain 1, and the “-” sign in MR discovered strain 1 means the base is deleted.

| Position | Bases in Assembled Contig | Bases in MR Discovered Strain 1 | Frequency | Segment Length | Change Type    |
|----------|---------------------------|---------------------------------|-----------|----------------|----------------|
| 289      | G                         | T                               | 4         | 0              | unavailable    |
| 1413     | T                         | C                               | 17        | 129            | non-synonymous |
| 1659     | A                         | C                               | 2         | 0              | non-synonymous |
| 1766     | T                         | G                               | 20        | 77             | synonymous     |
| 2938     | C                         | G                               | 1         | 58             | non-synonymous |
| 3270     | A                         | G                               | 27        | 117            | non-synonymous |



Table S3. *Cont.*

| Position | Bases in Assembled Contig | Bases in MR Discovered Strain 1 | Frequency | Segment Length | Change Type    |
|----------|---------------------------|---------------------------------|-----------|----------------|----------------|
| 5611     | C                         | T                               | 2         | 0              | non-synonymous |
| 6725     | -                         | T                               | 3         | 1              | non-synonymous |
| 7535     | A                         | C                               | 5         | 0              | non-synonymous |
| 7749     | C                         | A                               | 3         | 0              | non-synonymous |
| 8111     | G                         | A                               | 18        | 0              | non-synonymous |
| 8367     | A                         | T                               | 2         | 2              | non-synonymous |
| 9111     | G                         | A                               | 1         | 104            | non-synonymous |
| 10,347   | C                         | T                               | 25        | 0              | non-synonymous |
| 10,433   | T                         | A                               | 1         | 93             | non-synonymous |
| 10,925   | A                         | T                               | 4         | 0              | synonymous     |
| 11,840   | C                         | A                               | 3         | 0              | synonymous     |
| 11,944   | T                         | C                               | 20        | 103            | non-synonymous |
| 12,168   | A                         | G                               | 1         | 118            | non-synonymous |
| 13,328   | -                         | A                               | 2         | 4              | non-synonymous |
| 14,363   | G                         | T                               | 2         | 0              | unavailable    |
| 14,833   | C                         | T                               | 16        | 0              | unavailable    |
| 15,082   | T                         | -                               | 2         | 0              | unavailable    |
| 15,795   | T                         | G                               | 2         | 51             | unavailable    |
| 16,288   | C                         | T                               | 3         | 0              | unavailable    |
| 16,592   | G                         | T                               | 3         | 6              | unavailable    |
| 16,687   | T                         | -                               | 2         | 0              | unavailable    |
| 17,542   | T                         | C                               | 4         | 0              | unavailable    |
| 18,452   | A                         | G                               | 13        | 0              | unavailable    |
| 18,803   | C                         | A                               | 1         | 88             | unavailable    |
| 18,888   | C                         | T                               | 2         | 0              | unavailable    |
| 19,867   | T                         | A                               | 1         | 88             | unavailable    |
| 20,011   | C                         | T                               | 2         | 66             | unavailable    |
| 20,145   | C                         | G                               | 2         | 0              | unavailable    |
| 21,083   | G                         | A                               | 3         | 0              | unavailable    |
| 21,332   | C                         | T                               | 23        | 0              | unavailable    |
| 22,208   | G                         | A                               | 2         | 0              | synonymous     |
| 22,946   | G                         | A                               | 2         | 0              | synonymous     |
| 23,071   | C                         | T                               | 2         | 35             | non-synonymous |
| 23,259   | A                         | -                               | 2         | 0              | non-synonymous |
| 23,276   | C                         | T                               | 2         | 12             | synonymous     |
| 24,597   | A                         | T                               | 2         | 0              | non-synonymous |
| 24,773   | C                         | T                               | 23        | 0              | synonymous     |
| 25,220   | A                         | -                               | 3         | 0              | non-synonymous |
| 25,701   | T                         | A                               | 1         | 114            | unavailable    |
| 25,736   | C                         | T                               | 3         | 3              | unavailable    |

**Table S3. Cont.**

| Position | Bases in Assembled Contig | Bases in MR Discovered Strain 1 | Frequency | Segment Length | Change Type |
|----------|---------------------------|---------------------------------|-----------|----------------|-------------|
| 25,935   | G                         | T                               | 20        | 0              | unavailable |
| 27,086   | A                         | G                               | 2         | 0              | unavailable |
| 27,379   | T                         | A                               | 1         | 106            | unavailable |
| 27,754   | A                         | C                               | 2         | 85             | unavailable |
| 27,755   | C                         | T                               | 2         | 1              | unavailable |
| 27,756   | T                         | A                               | 2         | 0              | unavailable |
| 27,898   | G                         | T                               | 3         | 7              | unavailable |
| 27,992   | C                         | T                               | 26        | 0              | unavailable |
| 28,115   | T                         | C                               | 14        | 140            | unavailable |
| 28,243   | -                         | T                               | 4         | 1              | unavailable |
| 28,500   | C                         | T                               | 19        | 0              | unavailable |
| 28,813   | T                         | A                               | 1         | 81             | unavailable |
| 28,897   | C                         | T                               | 37        | 0              | unavailable |
| 29,028   | G                         | T                               | 5         | 36             | unavailable |
| 29,080   | -                         | A                               | 5         | 57             | unavailable |
| 29,524   | A                         | T                               | 1         | 128            | unavailable |
| 29,609   | T                         | C                               | 3         | 9              | unavailable |

**Table S4.** Verified substituted bases from MR discovered train 2.

| Position | Bases in Assembled Contig | Bases in MR Discovered Strain 2 | Frequency | Segment Length | Change Type    |
|----------|---------------------------|---------------------------------|-----------|----------------|----------------|
| 1558     | A                         | T                               | 1         | 134            | non-synonymous |
| 5598     | A                         | G                               | 2         | 0              | non-synonymous |
| 7471     | T                         | C                               | 2         | 0              | non-synonymous |
| 10,724   | T                         | A                               | 1         | 163            | non-synonymous |
| 13,378   | G                         | T                               | 2         | 0              | non-synonymous |
| 15,099   | T                         | A                               | 3         | 0              | unavailable    |
| 15,350   | A                         | T                               | 1         | 140            | unavailable    |
| 15,855   | A                         | T                               | 1         | 133            | unavailable    |
| 17,156   | T                         | C                               | 1         | 89             | unavailable    |
| 17,483   | G                         | A                               | 1         | 138            | unavailable    |
| 17,589   | G                         | T                               | 2         | 0              | unavailable    |
| 18,476   | A                         | G                               | 2         | 0              | unavailable    |
| 21,277   | G                         | A                               | 2         | 0              | unavailable    |
| 21,622   | T                         | A                               | 1         | 105            | non-synonymous |
| 22,283   | A                         | G                               | 2         | 0              | non-synonymous |
| 27,778   | G                         | A                               | 2         | 10             | unavailable    |
| 28,851   | T                         | G                               | 2         | 0              | unavailable    |

**Table S5.** Substituted bases of strain 1 from FMDV sample. The consensus sequence doesn't contain the first 350 bases in the reference genome sequence EU448639.1, so the positions are adjusted when determining the synonymity. The non-synonymous/synonymous ratio is 3.56. There are 178 changes in total.

| Position | Bases in Assembled Contig | Bases in FMDV Discovered Strain 1 | Frequency | Change Type    |
|----------|---------------------------|-----------------------------------|-----------|----------------|
| 64       | A                         | C                                 | 2         | unavailable    |
| 158      | G                         | A                                 | 2         | unavailable    |
| 233      | T                         | C                                 | 3         | unavailable    |
| 243      | A                         | G                                 | 21        | unavailable    |
| 299      | C                         | A                                 | 2         | unavailable    |
| 413      | A                         | G                                 | 81        | unavailable    |
| 426      | T                         | G                                 | 2         | unavailable    |
| 455      | A                         | C                                 | 11        | unavailable    |
| 538      | T                         | G                                 | 10        | unavailable    |
| 562      | A                         | G                                 | 2         | unavailable    |
| 593      | A                         | G                                 | 2         | unavailable    |
| 645      | T                         | C                                 | 4         | unavailable    |
| 767      | T                         | A                                 | 20        | non-synonymous |
| 799      | A                         | C                                 | 5         | non-synonymous |
| 853      | T                         | C                                 | 13        | non-synonymous |
| 863      | A                         | C                                 | 63        | non-synonymous |
| 942      | C                         | T                                 | 5         | synonymous     |
| 973      | A                         | G                                 | 2         | non-synonymous |
| 1009     | C                         | T                                 | 2         | non-synonymous |
| 1063     | A                         | C                                 | 115       | non-synonymous |
| 1123     | T                         | G                                 | 3         | non-synonymous |
| 1175     | T                         | G                                 | 5         | non-synonymous |
| 1189     | A                         | C                                 | 23        | non-synonymous |
| 1262     | T                         | G                                 | 2         | non-synonymous |
| 1342     | T                         | A                                 | 8         | non-synonymous |
| 1394     | T                         | A                                 | 31        | non-synonymous |
| 1398     | C                         | A                                 | 2         | non-synonymous |
| 1419     | T                         | C                                 | 4         | synonymous     |
| 1480     | T                         | C                                 | 8         | non-synonymous |
| 1483     | A                         | C                                 | 56        | non-synonymous |
| 1563     | T                         | G                                 | 7         | synonymous     |
| 1622     | G                         | A                                 | 3         | non-synonymous |
| 1639     | A                         | C                                 | 27        | non-synonymous |
| 1640     | A                         | C                                 | 49        | non-synonymous |
| 1690     | T                         | A                                 | 7         | non-synonymous |
| 1710     | T                         | C                                 | 2         | synonymous     |
| 1765     | T                         | G                                 | 2         | non-synonymous |

Table S5. *Cont.*

| Position | Bases in Assembled Contig | Bases in FMDV Discovered Strain 1 | Frequency | Change Type    |
|----------|---------------------------|-----------------------------------|-----------|----------------|
| 1820     | A                         | C                                 | 49        | non-synonymous |
| 1901     | A                         | G                                 | 53        | non-synonymous |
| 1912     | A                         | C                                 | 33        | non-synonymous |
| 1984     | A                         | G                                 | 27        | non-synonymous |
| 2034     | A                         | G                                 | 2         | synonymous     |
| 2081     | A                         | C                                 | 44        | non-synonymous |
| 2135     | T                         | G                                 | 130       | non-synonymous |
| 2142     | T                         | C                                 | 26        | synonymous     |
| 2157     | T                         | C                                 | 4         | synonymous     |
| 2220     | T                         | G                                 | 3         | synonymous     |
| 2282     | T                         | G                                 | 116       | non-synonymous |
| 2312     | T                         | C                                 | 2         | non-synonymous |
| 2330     | A                         | C                                 | 15        | non-synonymous |
| 2405     | G                         | A                                 | 453       | non-synonymous |
| 2417     | A                         | G                                 | 528       | non-synonymous |
| 2468     | T                         | C                                 | 2         | non-synonymous |
| 2486     | C                         | T                                 | 2         | non-synonymous |
| 2539     | T                         | A                                 | 4         | non-synonymous |
| 2605     | A                         | G                                 | 81        | non-synonymous |
| 2689     | T                         | G                                 | 9         | non-synonymous |
| 2714     | T                         | C                                 | 49        | non-synonymous |
| 2720     | A                         | C                                 | 96        | non-synonymous |
| 2788     | A                         | G                                 | 808       | non-synonymous |
| 2856     | T                         | G                                 | 102       | synonymous     |
| 2872     | A                         | G                                 | 109       | non-synonymous |
| 2932     | A                         | C                                 | 303       | non-synonymous |
| 2993     | T                         | C                                 | 3         | non-synonymous |
| 3046     | A                         | G                                 | 87        | non-synonymous |
| 3103     | T                         | C                                 | 4         | non-synonymous |
| 3120     | T                         | C                                 | 2         | synonymous     |
| 3199     | A                         | C                                 | 19        | non-synonymous |
| 3266     | A                         | C                                 | 128       | non-synonymous |
| 3320     | T                         | G                                 | 2         | non-synonymous |
| 3338     | A                         | G                                 | 5         | non-synonymous |
| 3400     | A                         | G                                 | 163       | non-synonymous |
| 3475     | G                         | A                                 | 2         | non-synonymous |
| 3524     | T                         | C                                 | 119       | non-synonymous |
| 3564     | A                         | G                                 | 92        | synonymous     |
| 3644     | A                         | C                                 | 32        | non-synonymous |

**Table S5. Cont.**

| <b>Position</b> | <b>Bases in Assembled Contig</b> | <b>Bases in FMDV Discovered Strain 1</b> | <b>Frequency</b> | <b>Change Type</b> |
|-----------------|----------------------------------|------------------------------------------|------------------|--------------------|
| 3645            | G                                | C                                        | 18               | non-synonymous     |
| 3671            | A                                | C                                        | 3                | non-synonymous     |
| 3725            | T                                | G                                        | 72               | non-synonymous     |
| 3759            | A                                | C                                        | 1302             | non-synonymous     |
| 3848            | T                                | A                                        | 524              | non-synonymous     |
| 3886            | A                                | C                                        | 23               | non-synonymous     |
| 3947            | T                                | C                                        | 8                | non-synonymous     |
| 3963            | A                                | C                                        | 11               | synonymous         |
| 4037            | C                                | T                                        | 10               | non-synonymous     |
| 4056            | A                                | C                                        | 58               | synonymous         |
| 4106            | T                                | G                                        | 2390             | non-synonymous     |
| 4169            | T                                | G                                        | 66               | non-synonymous     |
| 4170            | C                                | G                                        | 39               | non-synonymous     |
| 4171            | A                                | C                                        | 8                | non-synonymous     |
| 4223            | A                                | C                                        | 12               | non-synonymous     |
| 4276            | T                                | G                                        | 421              | non-synonymous     |
| 4292            | A                                | C                                        | 384              | non-synonymous     |
| 4381            | T                                | A                                        | 237              | non-synonymous     |
| 4419            | A                                | G                                        | 3                | synonymous         |
| 4441            | A                                | C                                        | 123              | non-synonymous     |
| 4450            | A                                | C                                        | 706              | non-synonymous     |
| 4510            | A                                | C                                        | 230              | non-synonymous     |
| 4565            | A                                | T                                        | 6                | non-synonymous     |
| 4629            | T                                | A                                        | 49               | synonymous         |
| 4663            | A                                | C                                        | 33               | non-synonymous     |
| 4735            | G                                | T                                        | 3226             | non-synonymous     |
| 4788            | C                                | T                                        | 2709             | synonymous         |
| 4868            | T                                | G                                        | 670              | non-synonymous     |
| 4896            | G                                | T                                        | 282              | non-synonymous     |
| 4946            | T                                | G                                        | 124              | non-synonymous     |
| 4983            | C                                | T                                        | 5                | synonymous         |
| 5033            | A                                | T                                        | 3                | non-synonymous     |
| 5085            | C                                | T                                        | 28               | synonymous         |
| 5118            | A                                | C                                        | 6                | non-synonymous     |
| 5177            | T                                | C                                        | 5                | non-synonymous     |
| 5228            | T                                | C                                        | 3                | non-synonymous     |
| 5278            | T                                | G                                        | 5                | non-synonymous     |
| 5299            | A                                | C                                        | 4                | non-synonymous     |
| 5394            | T                                | C                                        | 28               | synonymous         |
| 5419            | T                                | C                                        | 22               | non-synonymous     |

Table S5. *Cont.*

| Position | Bases in Assembled Contig | Bases in FMDV Discovered Strain 1 | Frequency | Change Type    |
|----------|---------------------------|-----------------------------------|-----------|----------------|
| 5469     | C                         | T                                 | 2         | synonymous     |
| 5478     | A                         | C                                 | 64        | synonymous     |
| 5544     | T                         | C                                 | 4         | synonymous     |
| 5552     | A                         | G                                 | 3         | non-synonymous |
| 5621     | T                         | G                                 | 12        | non-synonymous |
| 5624     | A                         | G                                 | 2         | non-synonymous |
| 5625     | G                         | A                                 | 6         | synonymous     |
| 5679     | T                         | G                                 | 8         | synonymous     |
| 5720     | C                         | A                                 | 664       | non-synonymous |
| 5780     | T                         | G                                 | 8         | non-synonymous |
| 5832     | C                         | A                                 | 3         | non-synonymous |
| 5846     | A                         | C                                 | 6         | non-synonymous |
| 5851     | A                         | G                                 | 44        | non-synonymous |
| 5860     | A                         | C                                 | 308       | non-synonymous |
| 5922     | A                         | T                                 | 4         | synonymous     |
| 5923     | G                         | T                                 | 4         | non-synonymous |
| 5945     | A                         | C                                 | 36        | non-synonymous |
| 5996     | G                         | A                                 | 8         | non-synonymous |
| 6010     | A                         | C                                 | 24        | non-synonymous |
| 6066     | T                         | G                                 | 16        | synonymous     |
| 6112     | A                         | C                                 | 169       | non-synonymous |
| 6165     | A                         | G                                 | 553       | synonymous     |
| 6236     | T                         | G                                 | 8         | non-synonymous |
| 6270     | T                         | C                                 | 2         | synonymous     |
| 6338     | T                         | G                                 | 9         | non-synonymous |
| 6396     | T                         | G                                 | 43        | synonymous     |
| 6399     | G                         | T                                 | 51        | synonymous     |
| 6400     | T                         | A                                 | 78        | non-synonymous |
| 6459     | T                         | G                                 | 130       | synonymous     |
| 6479     | T                         | A                                 | 24        | non-synonymous |
| 6543     | T                         | G                                 | 22        | non-synonymous |
| 6561     | A                         | C                                 | 70        | synonymous     |
| 6624     | T                         | G                                 | 14        | synonymous     |
| 6629     | A                         | G                                 | 10        | non-synonymous |
| 6680     | T                         | C                                 | 50        | non-synonymous |
| 6683     | A                         | G                                 | 4         | non-synonymous |
| 6740     | T                         | G                                 | 226       | non-synonymous |
| 6760     | A                         | C                                 | 2         | non-synonymous |
| 6793     | A                         | C                                 | 71        | non-synonymous |
| 6852     | T                         | C                                 | 3         | synonymous     |

**Table S5. Cont.**

| Position | Bases in Assembled Contig | Bases in FMDV Discovered Strain 1 | Frequency | Change Type    |
|----------|---------------------------|-----------------------------------|-----------|----------------|
| 6857     | A                         | G                                 | 21        | non-synonymous |
| 6930     | C                         | A                                 | 4         | non-synonymous |
| 6953     | C                         | T                                 | 4         | non-synonymous |
| 7004     | T                         | C                                 | 5839      | non-synonymous |
| 7091     | T                         | G                                 | 136       | non-synonymous |
| 7148     | T                         | G                                 | 17        | non-synonymous |
| 7197     | A                         | G                                 | 324       | synonymous     |
| 7254     | C                         | A                                 | 5         | non-synonymous |
| 7262     | A                         | C                                 | 56        | non-synonymous |
| 7344     | T                         | G                                 | 49        | non-synonymous |
| 7350     | T                         | C                                 | 125       | synonymous     |
| 7401     | C                         | A                                 | 3         | synonymous     |
| 7405     | A                         | C                                 | 16        | non-synonymous |
| 7461     | C                         | A                                 | 2         | synonymous     |
| 7478     | A                         | C                                 | 187       | non-synonymous |
| 7531     | A                         | C                                 | 30        | non-synonymous |
| 7612     | T                         | C                                 | 110       | non-synonymous |
| 7671     | A                         | G                                 | 3         | synonymous     |
| 7708     | G                         | T                                 | 2         | non-synonymous |
| 7777     | T                         | G                                 | 52        | unavailable    |
| 7828     | -                         | A                                 | 33        | unavailable    |
| 7829     | -                         | A                                 | 12        | unavailable    |

**Table S6.** Substituted bases of strain 2 from FMDV sample. The consensus sequence doesn't contain the first 350 bases in the reference genome sequence EU448639.1, so the positions are adjusted when determining the synonymity. The non-synonymous/synonymous ratio is 3.68. There are 166 changes in total.

| Position | Bases in Assembled Contig | Bases in FMDV Discovered Strain 2 | Frequency | Change Type |
|----------|---------------------------|-----------------------------------|-----------|-------------|
| 93       | A                         | C                                 | 2         | unavailable |
| 165      | A                         | G                                 | 2         | unavailable |
| 188      | G                         | A                                 | 2         | unavailable |
| 225      | A                         | G                                 | 2         | unavailable |
| 258      | A                         | C                                 | 20        | unavailable |
| 323      | A                         | G                                 | 2         | unavailable |
| 394      | T                         | G                                 | 203       | unavailable |
| 413      | A                         | G                                 | 25        | unavailable |
| 473      | T                         | C                                 | 10        | unavailable |
| 495      | G                         | A                                 | 3         | unavailable |

Table S6. *Cont.*

| Position | Bases in Assembled Contig | Bases in FMDV Discovered Strain 2 | Frequency | Change Type    |
|----------|---------------------------|-----------------------------------|-----------|----------------|
| 548      | A                         | G                                 | 2         | unavailable    |
| 607      | A                         | G                                 | 2         | unavailable    |
| 768      | C                         | A                                 | 4         | synonymous     |
| 804      | A                         | G                                 | 37        | synonymous     |
| 853      | T                         | C                                 | 24        | non-synonymous |
| 910      | T                         | C                                 | 2         | non-synonymous |
| 936      | G                         | A                                 | 2         | non-synonymous |
| 974      | T                         | C                                 | 2         | non-synonymous |
| 1026     | T                         | C                                 | 2         | synonymous     |
| 1063     | A                         | C                                 | 4         | non-synonymous |
| 1075     | A                         | C                                 | 34        | non-synonymous |
| 1131     | T                         | C                                 | 2         | synonymous     |
| 1201     | T                         | G                                 | 13        | non-synonymous |
| 1229     | A                         | T                                 | 2         | non-synonymous |
| 1347     | T                         | C                                 | 5         | synonymous     |
| 1402     | T                         | A                                 | 18        | non-synonymous |
| 1440     | G                         | A                                 | 6         | synonymous     |
| 1495     | T                         | C                                 | 9         | non-synonymous |
| 1498     | A                         | C                                 | 17        | non-synonymous |
| 1575     | T                         | C                                 | 2         | synonymous     |
| 1603     | A                         | C                                 | 3         | non-synonymous |
| 1654     | T                         | C                                 | 10        | non-synonymous |
| 1693     | G                         | A                                 | 2         | non-synonymous |
| 1795     | A                         | C                                 | 9         | non-synonymous |
| 1865     | T                         | C                                 | 10        | non-synonymous |
| 1867     | A                         | C                                 | 8         | non-synonymous |
| 1919     | T                         | G                                 | 130       | non-synonymous |
| 1942     | T                         | G                                 | 2         | non-synonymous |
| 1985     | A                         | C                                 | 2         | non-synonymous |
| 2067     | C                         | T                                 | 55        | synonymous     |
| 2142     | T                         | C                                 | 35        | synonymous     |
| 2163     | T                         | G                                 | 2         | synonymous     |
| 2214     | C                         | T                                 | 2         | synonymous     |
| 2274     | T                         | G                                 | 49        | synonymous     |
| 2338     | C                         | G                                 | 10        | non-synonymous |
| 2339     | G                         | C                                 | 4         | non-synonymous |
| 2404     | C                         | T                                 | 298       | non-synonymous |
| 2417     | A                         | G                                 | 237       | non-synonymous |
| 2456     | T                         | G                                 | 5         | non-synonymous |
| 2492     | A                         | G                                 | 2         | non-synonymous |



Table S6. *Cont.*

| Position | Bases in Assembled Contig | Bases in FMDV Discovered Strain 2 | Frequency | Change Type    |
|----------|---------------------------|-----------------------------------|-----------|----------------|
| 2522     | C                         | T                                 | 3         | non-synonymous |
| 2558     | T                         | C                                 | 2         | non-synonymous |
| 2577     | A                         | G                                 | 3         | synonymous     |
| 2662     | T                         | C                                 | 13        | non-synonymous |
| 2706     | T                         | C                                 | 2         | synonymous     |
| 2746     | A                         | C                                 | 73        | non-synonymous |
| 2799     | T                         | A                                 | 2         | non-synonymous |
| 2841     | A                         | T                                 | 15        | synonymous     |
| 2892     | T                         | G                                 | 17        | synonymous     |
| 2930     | T                         | C                                 | 54        | non-synonymous |
| 2932     | A                         | C                                 | 54        | non-synonymous |
| 3023     | T                         | G                                 | 3         | non-synonymous |
| 3063     | G                         | A                                 | 3         | synonymous     |
| 3107     | C                         | T                                 | 2         | non-synonymous |
| 3157     | A                         | C                                 | 8         | non-synonymous |
| 3235     | A                         | C                                 | 26        | non-synonymous |
| 3294     | T                         | G                                 | 5         | synonymous     |
| 3296     | A                         | G                                 | 2         | non-synonymous |
| 3297     | G                         | A                                 | 2         | non-synonymous |
| 3362     | T                         | C                                 | 3         | non-synonymous |
| 3409     | A                         | G                                 | 6         | non-synonymous |
| 3482     | A                         | C                                 | 4         | non-synonymous |
| 3557     | T                         | C                                 | 125       | non-synonymous |
| 3566     | A                         | G                                 | 5         | non-synonymous |
| 3617     | T                         | C                                 | 18        | non-synonymous |
| 3668     | A                         | G                                 | 3         | non-synonymous |
| 3680     | A                         | G                                 | 3         | non-synonymous |
| 3744     | T                         | G                                 | 92        | synonymous     |
| 3768     | C                         | A                                 | 384       | non-synonymous |
| 3867     | T                         | G                                 | 357       | synonymous     |
| 3895     | G                         | T                                 | 4         | non-synonymous |
| 3968     | T                         | C                                 | 9         | non-synonymous |
| 3972     | G                         | T                                 | 6         | synonymous     |
| 4057     | C                         | A                                 | 7         | non-synonymous |
| 4106     | T                         | G                                 | 853       | non-synonymous |
| 4111     | C                         | A                                 | 853       | non-synonymous |
| 4171     | A                         | C                                 | 8         | non-synonymous |
| 4172     | C                         | T                                 | 2         | non-synonymous |
| 4177     | A                         | G                                 | 5         | non-synonymous |
| 4234     | T                         | A                                 | 16        | non-synonymous |

Table S6. *Cont.*

| Position | Bases in Assembled Contig | Bases in FMDV Discovered Strain 2 | Frequency | Change Type    |
|----------|---------------------------|-----------------------------------|-----------|----------------|
| 4250     | A                         | G                                 | 101       | non-synonymous |
| 4310     | T                         | C                                 | 21        | non-synonymous |
| 4364     | T                         | G                                 | 138       | non-synonymous |
| 4381     | T                         | A                                 | 12        | non-synonymous |
| 4419     | A                         | C                                 | 53        | synonymous     |
| 4478     | A                         | C                                 | 185       | non-synonymous |
| 4549     | G                         | A                                 | 18        | non-synonymous |
| 4594     | T                         | C                                 | 10        | non-synonymous |
| 4649     | T                         | A                                 | 7         | non-synonymous |
| 4684     | A                         | C                                 | 38        | non-synonymous |
| 4735     | G                         | T                                 | 140       | non-synonymous |
| 4762     | T                         | G                                 | 140       | non-synonymous |
| 4807     | A                         | C                                 | 7         | non-synonymous |
| 4868     | T                         | G                                 | 250       | non-synonymous |
| 4871     | A                         | G                                 | 250       | non-synonymous |
| 4899     | C                         | A                                 | 545       | non-synonymous |
| 4958     | T                         | G                                 | 22        | non-synonymous |
| 4984     | C                         | T                                 | 3         | non-synonymous |
| 5066     | C                         | T                                 | 3         | non-synonymous |
| 5115     | C                         | T                                 | 7         | synonymous     |
| 5172     | A                         | G                                 | 7         | synonymous     |
| 5258     | T                         | G                                 | 4         | non-synonymous |
| 5325     | G                         | A                                 | 4         | synonymous     |
| 5335     | A                         | G                                 | 2         | non-synonymous |
| 5394     | T                         | G                                 | 12        | synonymous     |
| 5423     | A                         | G                                 | 10        | non-synonymous |
| 5475     | A                         | C                                 | 42        | synonymous     |
| 5528     | A                         | G                                 | 7         | non-synonymous |
| 5591     | T                         | C                                 | 15        | non-synonymous |
| 5604     | A                         | C                                 | 7         | synonymous     |
| 5676     | T                         | G                                 | 3         | non-synonymous |
| 5685     | A                         | C                                 | 82        | synonymous     |
| 5744     | A                         | G                                 | 24        | non-synonymous |
| 5801     | T                         | C                                 | 4         | non-synonymous |
| 5843     | T                         | G                                 | 7         | non-synonymous |
| 5851     | A                         | G                                 | 90        | non-synonymous |
| 5907     | A                         | G                                 | 5         | synonymous     |
| 5947     | C                         | T                                 | 8         | non-synonymous |
| 6026     | T                         | G                                 | 12        | non-synonymous |
| 6099     | T                         | C                                 | 326       | synonymous     |

Table S6. *Cont.*

| Position | Bases in Assembled Contig | Bases in FMDV Discovered Strain 2 | Frequency | Change Type    |
|----------|---------------------------|-----------------------------------|-----------|----------------|
| 6173     | T                         | G                                 | 117       | non-synonymous |
| 6185     | A                         | C                                 | 16        | non-synonymous |
| 6243     | C                         | A                                 | 8         | non-synonymous |
| 6252     | C                         | T                                 | 2         | synonymous     |
| 6298     | G                         | A                                 | 3         | non-synonymous |
| 6328     | A                         | T                                 | 9         | non-synonymous |
| 6398     | T                         | G                                 | 22        | non-synonymous |
| 6408     | C                         | G                                 | 30        | synonymous     |
| 6409     | G                         | A                                 | 72        | non-synonymous |
| 6459     | T                         | C                                 | 53        | synonymous     |
| 6500     | A                         | G                                 | 24        | non-synonymous |
| 6559     | T                         | C                                 | 16        | non-synonymous |
| 6569     | A                         | C                                 | 54        | non-synonymous |
| 6668     | T                         | C                                 | 60        | non-synonymous |
| 6752     | T                         | C                                 | 229       | non-synonymous |
| 6793     | A                         | G                                 | 35        | non-synonymous |
| 6844     | A                         | G                                 | 26        | non-synonymous |
| 6896     | T                         | C                                 | 10        | non-synonymous |
| 6960     | T                         | G                                 | 88        | synonymous     |
| 6994     | A                         | G                                 | 10        | non-synonymous |
| 7031     | A                         | G                                 | 10        | non-synonymous |
| 7129     | T                         | G                                 | 91        | non-synonymous |
| 7197     | A                         | G                                 | 6         | synonymous     |
| 7248     | C                         | A                                 | 4         | non-synonymous |
| 7253     | A                         | C                                 | 29        | non-synonymous |
| 7350     | T                         | C                                 | 1116      | synonymous     |
| 7399     | A                         | C                                 | 60        | non-synonymous |
| 7445     | A                         | C                                 | 59        | non-synonymous |
| 7499     | C                         | A                                 | 3         | non-synonymous |
| 7512     | A                         | C                                 | 23        | non-synonymous |
| 7607     | T                         | C                                 | 131       | non-synonymous |
| 7652     | A                         | G                                 | 2         | non-synonymous |
| 7695     | T                         | C                                 | 2         | synonymous     |
| 7726     | T                         | C                                 | 4         | unavailable    |
| 7784     | T                         | C                                 | 200       | unavailable    |
| 7790     | G                         | T                                 | 180       | unavailable    |

**Table S7.** Substituted bases of strain 3 from FMDV sample. The consensus sequence doesn't contain the first 350 bases in the reference genome sequence EU448639.1, so the positions are adjusted when determining the synonymity. The non-synonymous/synonymous ratio is 4.0. There are 170 changes in total.

| Position | Bases in Assembled Contig | Bases in FMDV Discovered Strain 3 | Frequency | Change Type    |
|----------|---------------------------|-----------------------------------|-----------|----------------|
| 246      | A                         | C                                 | 15        | unavailable    |
| 376      | A                         | G                                 | 2         | unavailable    |
| 436      | T                         | C                                 | 15        | unavailable    |
| 451      | A                         | C                                 | 19        | unavailable    |
| 521      | T                         | G                                 | 5         | unavailable    |
| 588      | C                         | T                                 | 2         | unavailable    |
| 649      | A                         | G                                 | 2         | unavailable    |
| 727      | A                         | G                                 | 2         | non-synonymous |
| 785      | T                         | C                                 | 4         | non-synonymous |
| 792      | A                         | C                                 | 8         | synonymous     |
| 844      | A                         | C                                 | 23        | non-synonymous |
| 918      | A                         | G                                 | 2         | synonymous     |
| 961      | A                         | G                                 | 4         | non-synonymous |
| 1030     | C                         | T                                 | 2         | non-synonymous |
| 1061     | A                         | C                                 | 16        | non-synonymous |
| 1113     | T                         | G                                 | 2         | synonymous     |
| 1149     | T                         | C                                 | 2         | synonymous     |
| 1204     | T                         | G                                 | 4         | non-synonymous |
| 1253     | A                         | G                                 | 4         | non-synonymous |
| 1319     | G                         | T                                 | 2         | non-synonymous |
| 1372     | T                         | A                                 | 18        | non-synonymous |
| 1409     | T                         | C                                 | 2         | non-synonymous |
| 1461     | T                         | G                                 | 5         | non-synonymous |
| 1489     | A                         | C                                 | 12        | non-synonymous |
| 1543     | G                         | A                                 | 2         | non-synonymous |
| 1606     | A                         | C                                 | 3         | non-synonymous |
| 1648     | A                         | C                                 | 9         | non-synonymous |
| 1778     | A                         | C                                 | 5         | non-synonymous |
| 1830     | A                         | C                                 | 4         | non-synonymous |
| 1878     | T                         | C                                 | 138       | synonymous     |
| 1942     | T                         | G                                 | 34        | non-synonymous |
| 2016     | T                         | C                                 | 2         | synonymous     |
| 2051     | C                         | T                                 | 2         | non-synonymous |
| 2071     | G                         | T                                 | 14        | non-synonymous |
| 2132     | T                         | G                                 | 4         | non-synonymous |
| 2220     | T                         | C                                 | 4         | synonymous     |
| 2279     | T                         | C                                 | 15        | non-synonymous |

Table S7. *Cont.*

| Position | Bases in Assembled Contig | Bases in FMDV Discovered Strain 3 | Frequency | Change Type    |
|----------|---------------------------|-----------------------------------|-----------|----------------|
| 2331     | C                         | -                                 | 58        | non-synonymous |
| 2398     | T                         | G                                 | 9         | non-synonymous |
| 2456     | T                         | G                                 | 11        | non-synonymous |
| 2503     | A                         | C                                 | 2         | non-synonymous |
| 2552     | T                         | C                                 | 4         | non-synonymous |
| 2581     | A                         | C                                 | 3         | non-synonymous |
| 2643     | A                         | C                                 | 10        | synonymous     |
| 2706     | T                         | C                                 | 2         | synonymous     |
| 2714     | T                         | C                                 | 5         | non-synonymous |
| 2720     | A                         | C                                 | 13        | non-synonymous |
| 2725     | T                         | C                                 | 42        | non-synonymous |
| 2850     | T                         | G                                 | 26        | non-synonymous |
| 2856     | T                         | G                                 | 3         | synonymous     |
| 2867     | A                         | G                                 | 12        | non-synonymous |
| 2924     | A                         | T                                 | 8         | non-synonymous |
| 2932     | A                         | C                                 | 8         | non-synonymous |
| 2976     | G                         | A                                 | 2         | synonymous     |
| 3029     | C                         | A                                 | 3         | non-synonymous |
| 3061     | C                         | T                                 | 2         | non-synonymous |
| 3122     | A                         | G                                 | 2         | non-synonymous |
| 3155     | T                         | C                                 | 2         | non-synonymous |
| 3202     | A                         | C                                 | 3         | non-synonymous |
| 3256     | A                         | C                                 | 12        | non-synonymous |
| 3319     | G                         | A                                 | 2         | non-synonymous |
| 3350     | T                         | C                                 | 2         | non-synonymous |
| 3401     | T                         | C                                 | 4         | non-synonymous |
| 3433     | C                         | A                                 | 3         | synonymous     |
| 3509     | A                         | G                                 | 110       | non-synonymous |
| 3559     | G                         | A                                 | 8         | non-synonymous |
| 3560     | C                         | T                                 | 2         | non-synonymous |
| 3573     | G                         | T                                 | 2         | non-synonymous |
| 3626     | T                         | A                                 | 10        | non-synonymous |
| 3627     | G                         | T                                 | 2         | synonymous     |
| 3678     | T                         | C                                 | 3         | synonymous     |
| 3716     | C                         | T                                 | 2         | non-synonymous |
| 3766     | T                         | A                                 | 10        | non-synonymous |
| 3767     | A                         | C                                 | 37        | non-synonymous |
| 3823     | T                         | G                                 | 275       | non-synonymous |
| 3836     | T                         | G                                 | 13        | non-synonymous |
| 3839     | T                         | C                                 | 2         | non-synonymous |

Table S7. *Cont.*

| Position | Bases in Assembled Contig | Bases in FMDV Discovered Strain 3 | Frequency | Change Type    |
|----------|---------------------------|-----------------------------------|-----------|----------------|
| 3889     | T                         | C                                 | 13        | non-synonymous |
| 3936     | G                         | A                                 | 4         | synonymous     |
| 3990     | A                         | G                                 | 85        | synonymous     |
| 4059     | T                         | G                                 | 7         | synonymous     |
| 4106     | T                         | G                                 | 51        | non-synonymous |
| 4111     | C                         | A                                 | 51        | non-synonymous |
| 4112     | T                         | A                                 | 51        | non-synonymous |
| 4114     | A                         | T                                 | 12        | non-synonymous |
| 4187     | T                         | G                                 | 11        | non-synonymous |
| 4258     | G                         | C                                 | 575       | non-synonymous |
| 4287     | C                         | G                                 | 375       | non-synonymous |
| 4373     | G                         | C                                 | 53        | non-synonymous |
| 4381     | T                         | A                                 | 6         | non-synonymous |
| 4389     | G                         | T                                 | 3         | non-synonymous |
| 4441     | A                         | C                                 | 428       | non-synonymous |
| 4494     | C                         | A                                 | 3         | non-synonymous |
| 4510     | A                         | G                                 | 83        | non-synonymous |
| 4571     | C                         | T                                 | 3         | non-synonymous |
| 4614     | A                         | G                                 | 7         | synonymous     |
| 4660     | A                         | C                                 | 16        | non-synonymous |
| 4726     | T                         | G                                 | 274       | non-synonymous |
| 4785     | C                         | A                                 | 5         | non-synonymous |
| 4797     | A                         | C                                 | 8         | synonymous     |
| 4868     | T                         | G                                 | 32        | non-synonymous |
| 4869     | T                         | G                                 | 32        | non-synonymous |
| 4908     | A                         | C                                 | 139       | non-synonymous |
| 4976     | T                         | G                                 | 12        | non-synonymous |
| 5015     | C                         | T                                 | 2         | non-synonymous |
| 5076     | C                         | A                                 | 3         | non-synonymous |
| 5085     | C                         | T                                 | 8         | synonymous     |
| 5137     | T                         | C                                 | 6         | non-synonymous |
| 5181     | G                         | T                                 | 3         | non-synonymous |
| 5265     | T                         | C                                 | 4         | synonymous     |
| 5316     | T                         | C                                 | 3         | synonymous     |
| 5362     | A                         | C                                 | 10        | non-synonymous |
| 5412     | C                         | A                                 | 3         | non-synonymous |
| 5417     | A                         | C                                 | 2         | non-synonymous |
| 5463     | A                         | C                                 | 39        | synonymous     |
| 5520     | A                         | C                                 | 4         | synonymous     |
| 5584     | G                         | A                                 | 4         | non-synonymous |

Table S7. *Cont.*

| Position | Bases in Assembled Contig | Bases in FMDV Discovered Strain 3 | Frequency | Change Type    |
|----------|---------------------------|-----------------------------------|-----------|----------------|
| 5612     | A                         | G                                 | 4         | non-synonymous |
| 5668     | A                         | G                                 | 4         | non-synonymous |
| 5689     | A                         | C                                 | 38        | non-synonymous |
| 5745     | C                         | G                                 | 22        | non-synonymous |
| 5808     | T                         | C                                 | 2         | synonymous     |
| 5810     | A                         | C                                 | 23        | non-synonymous |
| 5860     | A                         | C                                 | 76        | non-synonymous |
| 5904     | A                         | G                                 | 2         | synonymous     |
| 5924     | A                         | G                                 | 7         | non-synonymous |
| 6009     | C                         | T                                 | 57        | synonymous     |
| 6064     | G                         | C                                 | 3         | non-synonymous |
| 6081     | C                         | G                                 | 4         | non-synonymous |
| 6082     | A                         | G                                 | 4         | non-synonymous |
| 6145     | A                         | C                                 | 100       | non-synonymous |
| 6196     | A                         | C                                 | 5         | non-synonymous |
| 6252     | C                         | T                                 | 13        | synonymous     |
| 6325     | G                         | A                                 | 3         | non-synonymous |
| 6344     | A                         | G                                 | 2         | non-synonymous |
| 6396     | T                         | C                                 | 8         | synonymous     |
| 6404     | A                         | C                                 | 49        | non-synonymous |
| 6467     | T                         | C                                 | 14        | non-synonymous |
| 6541     | T                         | C                                 | 6         | non-synonymous |
| 6554     | A                         | C                                 | 48        | non-synonymous |
| 6604     | A                         | C                                 | 2         | non-synonymous |
| 6654     | T                         | A                                 | 5         | non-synonymous |
| 6657     | A                         | C                                 | 26        | synonymous     |
| 6707     | T                         | C                                 | 14        | non-synonymous |
| 6758     | T                         | C                                 | 87        | non-synonymous |
| 6830     | T                         | A                                 | 6         | non-synonymous |
| 6831     | A                         | G                                 | 13        | synonymous     |
| 6884     | A                         | G                                 | 16        | non-synonymous |
| 6956     | T                         | G                                 | 14        | non-synonymous |
| 6998     | A                         | C                                 | 5         | non-synonymous |
| 7056     | C                         | A                                 | 3         | non-synonymous |
| 7085     | A                         | G                                 | 8         | non-synonymous |
| 7136     | T                         | C                                 | 27        | non-synonymous |
| 7163     | C                         | T                                 | 5         | non-synonymous |
| 7227     | C                         | A                                 | 4         | synonymous     |
| 7262     | A                         | C                                 | 31        | non-synonymous |
| 7306     | A                         | C                                 | 9         | non-synonymous |

**Table S7. Cont.**

| Position | Bases in Assembled Contig | Bases in FMDV Discovered Strain 3 | Frequency | Change Type    |
|----------|---------------------------|-----------------------------------|-----------|----------------|
| 7370     | T                         | C                                 | 15        | non-synonymous |
| 7379     | A                         | C                                 | 16        | non-synonymous |
| 7432     | T                         | C                                 | 3         | non-synonymous |
| 7462     | A                         | C                                 | 27        | non-synonymous |
| 7512     | A                         | G                                 | 6         | synonymous     |
| 7563     | T                         | G                                 | 91        | synonymous     |
| 7627     | T                         | A                                 | 54        | non-synonymous |
| 7648     | T                         | C                                 | 2         | non-synonymous |
| 7685     | T                         | C                                 | 2         | non-synonymous |
| 7733     | G                         | C                                 | 2         | unavailable    |
| 7734     | A                         | G                                 | 2         | unavailable    |
| 7783     | C                         | T                                 | 267       | unavailable    |
| 7784     | T                         | C                                 | 267       | unavailable    |

## 1.2. Sequences

### 1.3. SRR11092062 Discovered Strain 1 Spike Protein Sequence

```

1 MFVFLVLLSLVSSQCVNLTT RTQLPPAYTNSFTRGVYYPD KVFRRSVLHSTQDLFLPFFS NVTWFHAIHVSGTNGTKRFD NPVLPFNDGVYFASTEKSNI 100
101 IRGWIFGTTLDSTQSKLLIV NNATNVVIKVCQFQCNDFP LGVYYHKNNKSWMESEFRVY SSANNCTFEYVSQPFLMDLE GKQGNFKNLREFVFNIDGY 200
201 FKITYSKHTPINLVRDLPGQF SALEPLVDLPIGINITRLQT LLALHRSYLTGPDSSSGWTA GAAAYYVGYLQPRFTLLKYN ENGTITDAVDCALDPLSETK 300
301 CTLKSFTVEKGYQTSNFRV QPTESIVRFPNITNLCPEGE VFNATRFASVYAWNRKRISN CVADYSVLVNSASFSTFKCY GVSPTKLNDLCFTNVYADSF 400
401 VIRGDEVRLQIAPGQTGIAD YNYKLDDFTGCVIAWNSNN LDSKVGNGNYLYRLFRKSN LKPFERDISTEYQAGSTPC NGVEGFNCYFPLQSYGFQPT 500
501 NGVGYQPYRVVLSFELLHA PATVCGPKKSTNLVKNKCVN FNFNGLTGTGVLTESNKKFL PFQQFGRDIADTTDAVRDPQ TLEILDITPCSGGVSITP 600
601 EVDTSNQVAVLYQDVNCTEV PVAIHADQLTPTWRVYSTGS NVFQTRAGCLIGAEHVNNSY ECDIPIGAGICASYQTQNS PRRARSVASQSIAYTMSLG 700
701 AENSVAYSNNISAIPTNFTI SVTTEILPVSMTKTSVDCTM YICGDSTECNLLLYQGSFC TQLNRGLTGLAVEQDKNTQE VFAQVKQIYKTPPIKDFGGF 800
801 NFSQILPDPSPKSKRSIED LLFNKVTADAGFIKQYQDC LGDIAARDHICAQKFNGLTV LPPLTDEMIAQYTSALLAG TITSGWTFGAGAALQIPFAM 900
901 QMAYRFNGIGVGTQNVLYENQ KLIANQFNSAIGIKQDSLSS TASALGKLQDVVNQNAQALN TLVKQLSSNFGAISSVLNDI LSRLDKVEAEVQIDRLITGR 1000
1001 LQSLQTYVTQQLIRAAEIRA SANLAATKMSLRLLGQSKRV DFCGKGYHLSFPQSAPHGV VFLHVTYVPAQEKNFTTAPA KSDDGKAHFPREGVFSNGT 1100
1101 HWFVTQRNFYEPQIITDNT FVSGNCDVIGIVNNVTYDP LQPELDSFKELDKYFKNHT SADVDLGDISGINASVNIQ KEIDRLNEVAKNLNESLIDL 1200
1201 QELGKYEYQIKWPWYIWLGF IAGLIAIVMTILCCMTSC CSCLKGCCSCGSCCKFDEDD SEPVLKGVKLHYT SEPVLKGVKLHYT 1273

```

### 1.4. Difference of SRR11092062 Discovered Strain 1 Spike Protein Sequence and SARS-CoV-2 Spike Protein Sequence

The format of EMBOSS Needle is that each three lines followed an empty line, the first in the three lines is 50 amino acid bases of SARS-CoV-2 original strain spike protein, the second line is the matching status, and the third line is 50 amino acid bases of discovered strain 1. | means the two bases at the position in the first protein sequence and the second protein sequence are the same, other signs mean the two bases are different. The figure is located at [1](#) and [1](#).

### 1.5. SRR11092062 Discovered Strain 2 Spike Protein Sequence

```

1 MFVFLVLLSLVSSQCVNLTT RTQLPKSDTNSFTRGVYYPD KVFRRSVLHSTQDLFLPFFS NVTWFHAIHVSGTNGTKRFD NPVLPFNDGVYFASTEKSNI 100
101 IRGWIFGTTLDSTQSKLLIV NNATNVVIKVCQFQCNDFP LGVYYHKNNKSWMESEFRVY SSANNCTFEYVSQPFLMDLE GKQGNFKNLREFVFNIDGY 200
201 FKITYSKHTPINLVRDLPGQF SALEPLVDLPIGINITRFQT LLALHRSYLTGPDSSSGWTA GAAAYYVGYLQPRFTLLKYN ENGTITDAVDCALDPLSETK 300
301 CTLKSFTVEKGYQTSNFRV QPTESIVRFPNITNLCPEGE VFNATRFASVYAWNRKRISN CVADYSVLVNSASFSTFKCY GVSPTKLNDLCFTNVYADSF 400
401 VIRGDEVRLQIAPGQTGIAD YNYKLDDFTGCVIAWNSNN LDSKVGNGNYLYRLFRKSN LKPFERDISTEYQAGSTPC NGVEGFNCYFPLQSYGFQPT 500
501 NGVGYQPYRVVLSFELLHA PATVCGPKKSTNLVKNKCVN FNFNGLTGTGVLTESNKKFL PFQQFGRDIADTTDAVRDPQ TLEILDITPCSGGVSITP 600
601 GTNTSNQVAVLYQDVNCTEV PVAIHADQLTPTWRVYSTGS NVFQTRAGCLIGAEHVNNSY ECDIPIGAGICASYQTQNS PRRARSVASQSIAYTMSLG 700
701 AENSVAYSNNISAIPTNFTI SVTTEILPVSMTKTSVDCTM YICGDSTECNLLLYQGSFC TQLNRALTGLAVEQDKNTQE VFAQVKQIYKTPPIKDFGGF 800
801 NFSQILPDPSPKSKRSIED LLFNKVTADAGFIKQYQDC LGDIAARDLICAQKFNGLTV LPPLTDEMIAQYTSALLAG TITSGWTFGAGAALQIPFAM 900

```



901 QMAYRFNGIGVTQNVLYENQ KLIANQFNSAIGKIQDSLSS TASALGKLQDVVNQNAQALN TLVKQLSSNFGAISSVLNDI LSRLDKVEAEVQIDRLITGR 1000

1001 LQSLQTYTVQQLIRAAEIRA SANLAATKMSECVLQGSQKRV DFCGKGHYLMSFPQSAHPGV VFLHVTVYVPAQEKNFTTAPA ICHDGKAHFPREGVFSVNGT 1100

1101 HWFVTQRNFYEPQIHTDNT FVSGNCDVVGIVNNTVYDP LQPELDSFKEELDKYFKNHT SPDVDLGDISGINASVVNIQ KEIDRLNEVAKNLNESLIDL 1200

1201 QELGKYEQYIKWPWYIWLGF IAGLIAIVMTIMLCCMTSC CSCLKGCCSCGSCCKFDEDD SEPVLKGVKLHYT 1273

1.6. Difference of Discovered Strain 2 Spike Protein Sequence and SARS-CoV-2 Spike Protein Sequence

The format of EMBOSS Needle is that each three lines followed an empty line, the first in the three lines is 50 amino acid bases of SARS-CoV-2 original strain spike protein, the second line is the matching status, and the third line is 50 amino acid bases of discovered strain 2. | means the two bases at the position in the first protein sequence and the second protein sequence are the same, other signs mean the two bases are different.The figure is located at [2](#) and [2](#).

1.7. SRR11092062 Discovered Strain 1 Nucleotide Sequence

1 ATTAAAGGTTTATACCTTCC CAGTAAACAACAACCAAC TTTCGATCTCTTGTAGATCT GTTCTCTAAACGAACTTTAA AATCTGTGTGGCTGCACTC 100

101 GCGTCGATGCTTAGTGCACT CACGCAGTATAATTAATAC TAATTACTGTCGTTGACAGG ACACGAGTAACCTCGTCTATC TTCTGCAGGCTGCTTACGGT 200

201 TTCTGCGGTGTTGCAGCCGA TCATCAGCACATCTAGGTTT CGTCCGGGTGTGACCGAAAG GTAAGATGGAGAGCCTTGTG CCTGTTTTCAACGAGAAAAAC 300

401 ACACGTCCAACCTCAGTTTGC CTGTTTTACAGGTTCCGCAC GTGCTCGCAGCTGGCTTTGG AGACTCCGTGGAGGAGGTCT TATCAGAGGCACGTCAACAT 400

401 CTTAAGAGTGGCACTTGTGG CTGTAGAGAAGTTGAAAG GGTGTTGCTGCTCAACTGAA CAGCCCTATGTGTTCATCA ACGTTGGATGCTCGAAGT 500

501 CACCTCATGTGTCATGTTATG GTTAGAGCTGTGAGCAAGT CGAAGGCATTACGTACGGTC GTAGCCGTGAGACACTGGT GTCCTTGCCCTCATGTGGG 600

601 CGAAATACCACTGGCTTACC GCAAGGTTCTTCTGTGAAG AACGGTAATAAAGGAGCTGG TGCCCATAGTTACGGGCCG ATCTAAAGTCATTTGACTTA 700

701 GCGGACGAGCTTGGCAGCTGA TCCTTATGAAGATTTTCAAG AAGATCTGGAACACTAAACAT AGCAGTGGTGTTACCCGTGA ACTCATGCGTGAGCTTAACG 800

801 GAGGGCCTACACTCGCTATG CTGATAACAACITCTGTG CCTGATGGTCCCTCTGT AGTCATTAAGAAGCCTTCTA CCACTGTCTGGTAAAGCTT 900

901 ATGCACCTTGTCCGACAAC TGCACCTTATTTGACACTAAG AGGGGTGTATCTGCTGCCG TGAACATGAGCATGAAATTG CTTGGTACACGGAAAGCTT 1000

1001 GAAAAGAGCTATGAATTGA CACACCTTTTGAATTAATAT TGGCAAAGAAATTGACACC TTCAATGGGGAATGCCAAA TTTTGTATTTCCTTAAAT 1100

1101 CCATAATCAAGACTATTTCAA CCAAGGGTTGAAAAGAAAAA GCTTGATGGCTTATGGGTA GAATTCGATCTGTCTATCCA GTTGGCTGACCAAATGAAT 1200

1201 CAACCAAAATGTGCTTTTCAA CTCTCATGAAGTGTGATCAT TGTGTTGAAACTTCATGGCA CAGCGGCGAATTTGTAAAG CCATCTGCCGAATTTGTGGC 1300

1301 ACTGAGAAATTTGACTAAAGA AGGTGCCACTACTTGTGGTT ACTTACCCCAAAATGCTGTT GTTAAATTTATTTGTCAGC ATGTCACAATTCAGAAGTAG 1400

1401 GACCTGAGCATAGTCTTGCC GAATACCCATAATGAATCTGG CTGAAAACCAATCTTCTGTA AGGGTGGTGCACACTATTGCC TTGGAGGCTGTGTGTCTC 1500

1501 TTATGTGTGTTGCCATAACA AGTGTGCCATTGGGTTCCTA CGTGCTAGCCGCTAACATAGG TTGTAACCATACAGGTGTG TTGGAGAAGGTTCCGAAGGT 1600

1601 CTTAATGACAACTTCTTGA AATACTCCAAAAGAGAAAG TCAAGATCAATATTGTTGGT GACTTTAAACTTAATGAAGA GATCGCCATTATTTGGCAT 1700

1701 TCAATTTTCTCCGCACCTCT TGAACCTGCTCAAAATTC TG TCGGTGTTTTACAGAAGGCC GCTATAACAATACTAGATGG AATTTACAGTATTCACCTGA 2000

2001 GACTCATTTGATGTATGATG TTACATCTGATTGGCTAC TAACATCTAGTTGTAATGG CTTACATTAACAGGTGGTGT GTTCAGTTGACTTCGCAGTG 2100

2101 GCTAACTAACATCTTTGGCA CTGTTTTGAAAAAAGCTTCAA CCGTCTCTGATTGGCTTGA AGAGAAGTTTAAGGAAGGTG TAGAGTTTCTTAGAGACGGT 2200

2201 TGGGAAATTTGTAATTTAT CTCAACCTGTGCTTGTGAAA TTGTCGGAAGTCGGATTGTC ACCTGTGCAAAGGAAATTA GAGAGAGTGTTCAGACATCT 2300

2301 TTAAGCTGTAAATAAATTT TGGCTTTGTGTGCTGACT TATCATATTGGTGGAGCTA AACTTAAAGCCTTGAATTIA GGTGAAACATTTGTCACGCA 2400

2401 CTCAAAGGGATTGACAGAA AGTGTGTAAATCCAGAGAA GAACTGGCAAGTCGGATCG TAGAAAAGCCCCAAAAGAAA TTAATCTCTTAGAGGGAGAA 2500

2501 ACACCTTCCCACAGAAGTGT AACAGAGGAAGTTGTCTTGA AAACCTGGTGAATTTACAACCA TTAGAACAACCTACTAGTGA AGCTGTTGAAGCTCATTGG 2600

2601 TTGTACACCAAGTTTGAAT AACGGGCTTATGTTGCTGCA AATCAAGACACAGAAAAGT ACTGTGCCCTTGCACTTAAT ATGATGGTAAACAAACAATAC 2700

2701 CTTCACTCAAAAGGCGGTG CACCAACAAGGTACTTTT GGTGATGACACTGTGTATAGA AGTCAAGGTTTACAAGAGTG TGAATATCACTTTTGAACCT 2800

2801 GATGAAGGATTGACAAAGT CTAATATGAGAAGTCTCTG CCTATACAGTTGAACCTCGT ACAGAAGTAAATGAGTTCGC CTGTGTTGTGGCAGATGCTG 2900

2901 TCATATAAACTTTGCAACCA GTATCTGAATTACTTACACC ACTGGCATTGATTAGTGAAG AGTGGAGTATGGCTACATAC TACTTATTTGATGATCTGG 3000

3001 TGAGTTTAAATGGCTTAC ATATGATTGTCTTCTTCTAC CCTCCAGATGAGGATGAAGA AGAAGGTGATTGTGAAGAAG AAGAGTTTGAGCCATCACT 3100

3101 CAATATGAGTATGGTACTGA AGATGATTAAGCAAGTAAC TTTGGAATTTTGGTGCCACT TCTGCTGTCTTCAACCTGA AGAAGAGCAAGAAGAAGAT 3200

3201 GGTGTAGATGATGACTGCAA CAAACTGTGGTCAACAAGA CGGCAGTGAGGACAATCAGA CAATTACTATTCAACAATTT GTTGAGGTTCAACCTCAATT 3300

3301 AGAGATGGAACCTACACAG TGTGTCAGACTATTGAAGTG AATAGTTTATGTGTTTATT AAACTTACTGACAATGAT ACATTAATAAATGCAGACAT 3400

3401 GTGGAAGAGCTTAAAGAGT AAAACCAACAGTGGTGTGTA ATGCAGCCAAATGTTTACCTT AAACATGGAGAGGTGTGCG AGGAGCCTTAAATAAGGCTA 3500

3501 CTAACAAATGCCATCAAGTT GAATCTGATGATTACATAGCG TACTAATGGACCACTTAAAG TGGGTGGTATGTGTGTTTTA AGCGGACACAATCTTGCTAA 3600

3601 ACACGTGCTTCAITGTTGTG GCGCCAGATGTACAAGAGT GAGACACATTCAACTTCTAA GAGTGTCTATGAAAATTTTA ATCAGACAGAAGTTTCACT 3700

3701 GCACCATTAATTACAGCTGG TATTTTGGTGTGACCCCTA TACATCTTTAAGAGTTTGT GTAGATACTGTTCGCACAAA TGTTACTTAGCTGTCTTTG 3800

3801 ATAAAAAATCTCTATGACAAA TCTGTTTCAAGCTTTTGGAA AATGAAGAGTGA AAAAGCAAG TTGAACAAAAGATCGCTGAG ATTCTTAAAGAGGAAGTTAA 3900

3901 GCGATTTTATATGAAAGTA AACCTTCACTGTGACACAGAGA AAACAAGATGATAAGAAAAA CAAAGAGTTGTGTTGAAGAAG TTACAACAACCTTGGAAGAA 4000

4001 ACTTAAGTCTTACACGAAAA CTTGTATGATTTATATGACA TTAATGGCAATCTTGTCTCCA GATTCTGCCACTTCTGTAG TGACATTGACATCACTTTCT 4100

4101 TAAAGAAAGATGCTCCATAT ATAGTGGGTGATGTGTTTCA AGAGGGTGTTTAATCTGCT TGGTATACCTACTATAAAG GCTGTGGCACTACTGAAAT 4200

4201 CTAGCGGAAGCTTTGAGAA AAGTGCCAACAGACAATTAAT ATAACCACTTACCCGGGTCA GGGTTTAAATGGTTTACACTG TAGAGGATGCAAAAGACAGTG 4300

4301 TTTAAAGAGTGTAAAGGTGC CTTTACATCTACCACTATA TTAATCTCTAATGAGAAGCAA GAAATTTCTTGGAACTGTTT TGGAAATTTGGCAGAAATGC 4400

4401 CTTCAACAGAGAGAACAACA CTTTGAATTAATGCTGTCTG TTGGAAGAACTTAAAGCCATAG TTTCATATACAGCGTAA TATAAGGGTATTAATAATACA 4500

4501 AGAGGGTGTGGTGTGATTG GTGCTAGATTTTACTTTTAC ACCAGTAAACAACCTGTAGC GTCACTTATCAACACACTTA ACGATCTAAATGAAACTCTT 4600

4601 GTTACAAATGCCACTTTGAGA AATGACAGAGCTGTGCTGATAT TGAAGAAGCTGTGCTGGTAT ATGAGATCTCTCAAAGTGCC AGCTACAGATTTCTGTTCCT 4700

4701 CACTGATGCTGTTCACGCG TATAATGTTATCTTACTTCT TCTTCTTAAACACCTGGAAG AACATTTTATTGAAACCATC TCACCTGTGCTGTTCTATAA 4800

4801 AGATTGTGCTTATTTGAGC AATCTACCACTTAAAGAGTTGA GAATTTCTTAAAGAGAGTTGA TAAAAGTGTATATTACTACTA GTAATCCTACCACTTCCAC 4900

4901 CTATGAGTGTGAAGTTATCAC CTTTGACAATCTTAAGACACT TCTTCTTTTGAGAGAAGTG AGGACTATTAAAGGTGTTTAC AACAGTAGACAACATTAACC 5000

5001 TCCACAGCGCAAGTTGTGAG ATGTCAATGATGATTTAGGACA ACAGTTTGGTCCAACTTAAT TGGATGGAGCTGATGTACT AAAATAAAACTTCAATTC 5100

5101 ACATGAAGGTAAACCAATTT ATGTTTACCTTAATGATGAC ACTCTACGTGTGAGGCTTT TGAATACTACCACAAGCTG ATCTAGTTTCTCGGGTAGG 5200

5201 TACATGTGACGATAAATACA CACTAAAGTAAAGTAAATACC CACAAGTTAATGGTTTAACT TCTATTAATAAGGCAATAA CAACTGTCTTCTGCCACTG 5300

5301 CATTGTAAACCTCCAAACA ATAGAAGTTGAGTTTAAATCC ACTGCTCTTACAAGATGCTT ATTACAGAGCAAGCGCTGT GAAGCTGTCTAATCTTGTGC 5400

5401 ACTTATCTTACCTACTGTA ATAGACAGTAAAGTGAATTA GGTGATGTTAGAGAAACAT GAGTTACGTGTGTTTCAACAT CCAATTAGATCTTCTGCAA 5500

5501 AGAGTCTTGAACGTGGTGTG TAAACITTTGTGACAAACAG AGACAACCCCTTAAGGGTGTG GAAGCTGTATTGTACATGGG CACACITTTCTTATGAACAT 5600

5601 TTAAGAAAGGTGTTCAGATA CTTGTACGTGTGTTAAGTACA AGCTACAAAATCTACTAGT AACAGGAGTCACCTTTTGT ATGATGTGACGACCACTGC 5700

5701 TCAGTATGAACCTAAGCATG TCAATTTACTTGTGTGTAGT GATGACACTGGTAATTATCA GTGTGGTCACTATAAACATA TAACCTCTAAAGAAAACTTG 5800

5801 TATGTGATGACAGCGTGCTT ACTTACAAAGTCCCTCAGAA ATCAAAGGTCTTATACGGAT GTTTTCTACAAAGAAAACAG TTACACAACAACCAATAAAC 5900

5901 CAGTACTTATAAATTTGGAT GGTGTGTGTTGTACAGAAAT TGACCTTAAGTTGGACAAT ATTATAAGAAAGACAATCT TATTTCACAGAGCAACCAAT 6000

6001 TGATCTGTGACCAAAACCAAC CATATCCAAACGCAAGCTTC GATAAATTTAAGTTTGTATG TGATAATATCAAATTTGCTG ATGATTTAAACCAAGTTAACT 6100

6101 GTGTATAAGAAACCTGCTCT CCGACTTCTTAAAGTTACAT TTTCCCTGACTTAAATGGT GATGTGGTGGCTATTGATTA TAAACACTACACACCCTCT 6200

6201 TTAAGAAAGGAGCTAAATGT TTACATAAACCTATTGTTTG GCAITGTAAACAATGCAACTA ATAAAGCCAAAGTCGGATCCA AATACCTGGTGTATACGTTG 6300

6301 TCTTTGGAGCAAAAACCCAG TTGAAACATCAAACTGTTT GTATGACTGAAGTCAGAGGA CGCGAGGGAATGGATAATC TTGCTGCGAAGATCTAAAA 6400

6401 CCACTGCTCTGAAGAAGTAGT GGAAAACTCTACCATACAGA AAGACGTTCTTGAGTGAAT GTGAAAACCTACCGAAGTTGT AGGAGACATTATCTTAAAC 6500

6501 CAGCAATAATAGTTTAAAA ATCAGACAAGTGTGCTGTGCTA CACAGACTATTTAGGCTGCTT ATGATAGCAAATCTAGTCTT ACTTAATAAGAAACCTAATGA 6600

6601 ATTATCTAGATATTAGGTT TGAAAACCCCTGTCTACTAT GGTTTAGTCTGCTGTTAATAG TGTCCCTTGGGATACTATAG CTAATTATGCTAAGCCTTTT 6700

6701 TCTAAACAAGTTTGTATGAT CAACTACCAATGATGTACAC GGTGTTTAAACCGTGTGTTT ACTAATTATATGCTCTTATT TTTACTTTTATGCTACAAT 6800

6801 TGTGTACTTTTACTAGAAGT ACAATTTCTAGAATTAAGC ATCTATGCCGACTACTATAG CAAAGAATACTGTTAAGAGT GTCGGTAAATTTTGTCTAGA 6900

6901 GCGTTCATTAATTTATGTA AGTACCTAATTTTCTTAA CTTGATAAATTAATTAATTTG GTTTTACTATTAAAGTGTT GCTAGGTTCCTTAACTAC 7000

7001 CAAACCGCTGCTTTAGGTGT TTAATGTCTAATTTAGGCA TGCCCTTCTACTGTACTGGT TACAGAGAAGGCTATTGAA CTCTACTAATGCACTATTG 7100

7101 TCAACTACTGTGTTGTTCT TACTTGTGATGTTTCTTTAG TAGTGGTTTATGATCTTTAG ACACCTATCTCTTTTAAAG ACTATACAAATACCATTTC 7200

7201 ATCTTTTAAATGGGATTTAA CTCGTTTGGCTTGTAGTTGA CCGTGTGGCTCCGACTTAT TCTTTTCTACTAGGTTTCT ATGTAATGGATTGGCTGCA 7300

7301 ATCTGATTTGTTTTCAG CTAITTTTGCACTATTTTATA TGTATGGAAAAGTTATGTC AGTTGTAGACGGTGTGAAT TCATCAACTTGTATGATGTG 7400

7401 TTAAGCAAGTAATAGACCAA CTTTGTGCAATTTTATTAAT ATGTTAATGGTGTGAAGTGTCTT TAACTTACTACTGTACTAT AGATCAGGCATFAGTCTCTG 7500

7501 AAATCAACAATTTGAAGTGT TGTAAATGCTGATCACTGT GTGCTGGTACTACTTATTAT ACTGATGAAGTTCGAGAGA CTTGTCACTACAGTTTAAAA 7600

7601 GACCAATAAATCTACTGAC CAGTCTTCTTACATCTTTGA TGTGTTACAGTGAAGAATG GTTCCATCCACTTTTACTTT GATAAAGCTGTGCTAAAAAC 7700

7701 TTAAGAAACATTTCTCTCT CTAATTTTGTAACTTGAAC AACCTGAGAGCTAATAACAC TAAAGGTTTCAATGCCATTA ATGTTATAGTTTGTGATGTG 7800

7801 AAATCAAAATGTGAAGAAAT CTTGCAAAAGTCGATCGTGT TTACTACAGTCACTTATG TGTCACTTACTACTGTACT AGATCAGGCATFAGTCTCTG 7900

7901 ATGTTGGTATGTCGGGAA GTTGCAGTTTAAATTTTGA TGCTATGCTTAATACGTTTT CATCAACTTTTAAACGTACCA ATGGAATAAAGCTCAAAACCT 8000

8001 AGTTGCAACTGACAGAAGCTG AATGTCGAAGAATGTGCTC TTAGACAATGCTTATCTAC TTTTATTTACGCGCTTGGCC TCCGACTTGTGATTCAGAT 8100

8201 GTAGAAACCAAGGATGTTT TGAATGTTCTTAATTTGTAC ATCAACTTGACATAGAAGTT ACTGGGATAGTTGTAATAA CTAATGCTCACCTATAACA 8300

8301 AAGTTGAAAAATGACACCC CGTGACCTTGGTGCTTGTAT TGACTGTAGTGCGCGTCATA TTAATGCGCAGGTAGCAAAA AGTCACAACATTGCTTTGAT 8400  
8401 ATGGAACGCTTAAAGATTCTA TGTCATTGTCTGCAAGAACTA CGAAACCAAAATACGTAGTGC TGCTAAAAAGAATAACTTAC CTTTAAAGTTGACATGTGCA 8500  
8501 ACTACTAGTAAAGATTGTGTA CTGTTGAACCAACAAGATAG CACTTAAGCGGTGTA AAAAT GTTAATAATTGGTTGAAGCA GTTAATTAAGTTACACTTG 8600  
8601 TGTTCCCTTTTGTGTGCT ATTTTCTATTTAATAACACC TGTTCAITGCTATGCTAAAC ATACTGACTTTTCAAGTGAA ATCATAGGATACAAAGGCTAT 8700  
8701 TGATGGTGGTGCTACTCGTG ACATAGCATCTACAGATACT TGTTTGTCTAACAAACATGCT TGATTTTGACACATGGTTTA GCCAGCGTGGTGGTAGTTAT 8800  
8801 ACTAATGACAAAGCTGGCC ATTGATTGCTGCAGTCATAA CAAGAGAAGTGGGTTTTGCT GTGCCTGGTTTGCCCTGGCAC GATATTACGCCACAACATAATG 8900  
8901 GTGACTTTTTTGCATTTCTTA CCTAGAGTTTTTAGTGCAGT TGGTAACATCTGTATACAC CATCAAAACTTATAGAGTAC ACTGACTTTGCAACATCAGC 9000  
9001 TTGTGTTTTGGCTGCTGAAT GTACAATTTTAAAGATGCT TCTGGTAAGCCAGTACCATA TTGTATGATACCAATGTAC TAGAAGGTTCTGTGTCTTAT 9100  
9101 GAAAGTTTACGCCCTGACAC ACGTTATGTGCTCATGGATG GCTCTATTATICAATTTCTT AACACCAACCTTGAAGGTTCT TGTTAGAGTGGTAACAACTT 9200  
9201 TTGATTCTGAGTACTGTAGG CACGGCACTGTGAAAGATC AGAAGCTGGTGTGTTGTGAT CTACTAGTGGTAGATGGGTA CTTAACAAATGATTATTACAG 9300  
9301 ATCTTTACCAGGAGTTTTCT GTGGTGAGATGCTGTAAT TTACTTACTAATATGTTTAC ACCACTAATTC AACCTATTG GTGCTTTGGACATATCAGCA 9400  
9401 TCTATAGTAGCTGGTGGTAT TGTAGCTATCGTAGTAACAT GCCTTGGCTACTATTTTATG AGGTTTAGAAGAGCTTTTGG TGAATACAGTCATGTAGTTG 9500  
9501 CCTTTAATCTTTACTAATTC CTATGTCATTCACTGTA CTGTTTAAACACCAAGTTTACT CATCTTACCTGGTGTATT TCTGTTATTTACTTGTACTT 9600  
9601 GACATTTTATCTTACTAATG ATGTTTCTTTTTTAGCACAT ATTCACTGGATGGTTATGTT CACACCTTTAGTACCTTTCT GGATAACAATTGCTTATAIC 9700  
9701 ATTTGTATTTCCACAAAGCA TTCTATTTGGTCTTTAGTA ATTACCTAAAGAGACGTGTA GTCTTAAATGGTGTTCCTT TAGTACTTTGAAGAAGCTG 9800  
9801 CGCTGTGCACCTTTTTGTTA AATAAAGAAATGTATCTAAA GTTGGTAGTGATGTGCTAT TACCTCTTACGCAATATAAT AGATACTTAGCTCTTTATA 9900  
9901 TAAGTACAAGATTTAGCTG GAGCAATGGATACAACCTAGC TACAGAGAAGCTGCTTGTG TCATCTCGCAAGGCTCTCA ATGACTTTCAGTAACCTCAGGT 10000  
10001 TCTGATTGACTTTTACCAAC ACCACAAACCTCTATCACT CAGCTGTTTTTCCAGAGTGGT TTAAGAAAAATGGCATTTCC ATCTGGTAAAGTTGAGGGTT 10100  
10101 TGTAGGTACAAGTAACCTTGT GTAGTACACTACATACCG TCTTTGGCTTATGACGTAG TTAATCTGCAAGACATGTT ATCTGCACTCTGAAGCAT 10200  
10201 GCTTAACCCTAATTATGAAG ATTTACTCAITTCGTAAGTCT AATCATAATTTCTTGTGACA GGCTGGTAATGTTC AACTCA GGGTATTGGCACTTTCTATG 10300  
10301 CAAAATTTGTGTTACTTAAGT TAAGGTGTATACAGCCAACT CTAAGACACCTAAGTATAAG TTTGTCGCATTC AACCAGG ACAGACTTTTTCACTGTTAG 10400  
10401 CTTGTGTACAAATGTTACCA TCTGGTGTGTACAAATGCT TATGAGGCCGCAATTCACCTA TTAAGGGTTCATCTCTTAAT GGTTCATGTGGTAGTGTGG 10500  
10501 TTTTAACATAGATTATGACT GTGTCTCTTTTGTATACATG CACCAATGGAAATTCACCA TGGAGTTCATGCTGGCACAG ACTTGAAGGTAACCTTTAT 10600  
10601 GGACCTATTTTGTGACAGGCA AACAGACACAACGACGTGGTA CGGACACCACTATTACAGTT AATGTTTAGCTTGGTTGTA CGCTGCTGTTATAAATGGAG 10700  
10701 ACAGTGGTGTCTCTCAATCGA TTACCAACAACCTTATATGA CTTAACTCTTGTGGCTATGA AGTACAATATTGAACCTCTA ACACAAGACCAATGTGACAT 10800  
10801 ACTAGGACCTCTTCTGCTCT AAATCGGAATGGCGGTTATG GATATGTGTGCTTCTCATTA AAAAATTACTGCAAAATGGTA TGAATGGACGTACCACTATTG 10900  
10901 GGTAGTGGTCTTATTAAGA GAATTTTACACCTTTGATGT TGTATAGACAATGCTCAGGTG TTACTTTCCAAAGTGCGAGTG AAAAGAACAATCAAGGGTAC 11000  
11001 ACACCACTGTGTGTACTCA CAATTTTGTGTTTACTTGA GTTTTAGTCCAGAGTACTCA ATGGTCTTTGTTCTTTTTT TGTATGAAAATGCCTTTTTA 11100  
11101 CCTTTGCTATGGGTAATAT TGTCTATGTCTGTTTTGCAA TGAITGTTGTC AAACATAAAG CATGCATTTCTCTGTTGTT TTTGTTACCTTCTCTTGCCA 11200  
11201 CTGATGCTTATTTAATATG CTCATATGCTGCTAGTGT GGTGATGCGTATTATGACAT GGTGGATATGTTGATACT AGTTTGTCTGGTTTAAAGCT 11300  
11301 AAAAGTGTGTTATGTATGT CATCAGCTGTAGTGTACTA ATCTTATGACAGCAAGAAC TGTGTATGATGATGGTGGCTA GGAGAGTGTGGACACTTATG 11400  
11401 AATGTTCTGACACTCGTTTA TAAAGTTTATTTAGTGAAT GTTATGACTAAGCCCAATTTCC ATGTGGGCTCTTATAATCTC TGTACTTCTAACTACTCAG 11500  
11501 GTGTAGTGTCAACATGCTATG TTTTGGCCAGAGGATATGT TTTATGTGTGTGAGTATT GCCCTATTTCTTCTATAACT GGTAATACACTTCACTGTAT 11600  
11601 AATGCTAGTTTATTTTCTT TAGGCTATTTTGTACTGT TACTTTGGCCTTTTGTGTT ACTCAACCGTACTTTAGAC TGACTTCTGGTGTTTAATG 11700  
11701 TACTTGTGTTTACACAGGA GTTTAGATAATGAATTCAC AGGGACTACTCCACCCAAG AATAGCATAGATGCTTCAA ACTCAACATTAAATTTGTTGG 11800  
11801 GTTGTGGTGGCAACCTTGTA CTCAAGTATGATGCTGAC GCTAAAGATGTCAGATGTAA AGTGCAATCAGTAGTCTTA CTCTCAGTTTTCGAACAAC 11900  
11901 CAGAGTAGAATCTATCTCTA AATTTGGGCTCAATGTGTC CAGTTACACAATGACATTTCT CTTAGCTTAAAGATACTACTG AAGCCTTTGAAAAAATGGTT 12000  
12001 TCACTACTTTCGTTTTGCTT TCCATGAGTGGCTGTGAT ACATAAACAAGCTTTGTGAA GAAATGCTGGACAACAGGGC AACCTTACAAGCTATAGCCT 12100  
12101 CAGAGTTTATGTCCTTCCA TCATATGTCAGCTTTGCTAC TGCTCAAGAAGCTTATGACC AGGCTGTGCTAATGGTGAT TCTGAAGTTGTTCTTAAAA 12200  
12201 GTTGAAGAAGTTTGAAGT GCTATGCTCAATTTAGC CTGTAGTACGCCATGCAACG TAAGTTGGAAAAAGATGGCTG ATCAAGCTATGACCCAATG 12300  
12301 TATAACAAGCTAGATCTGA GGACAAGGGGCAAAAGCTA CTAGTGTCTATCGACACAATG CTTTTCACATGCTTAGAAA GTTGGATAATGATGCACCTA 12400  
12401 AACAACCTTACCAAAATGCA AGAGATGTGTGTTGCTTCCCT GAACATAACTCTTATCAA CACGACGCCAAACTAATGGTT GTCATACCAGACTATAACAC 12500  
12501 ATATAAATAACGTGTGATGG TACAACATTTACTTATGCT AT CAGCATTTGCGAAATCCAA CAGGTGTGATAGTGCAGATAG TAAATTTGTTCACTTAGTG 12600  
12601 AAATGTAGTATGACAAATTC CTTAATTTAGCATGGCTCT TATTGTAAACAGCTTTAAGGG CCAATTCGTCTGTCAAATTA CAGAATAATGAGCTTAGTCC 12700  
12701 GTTGTGACTACGACAGATGT TCTGTGCTCGCGGTACTACA CAACTCGCTGTGACTATGTA CAATCGGTAGCTTACTACTA ACACAACAAGGGAGTAGG 12800  
12801 TTTGATCTTGCACGTTTATC CGATTTTACAGGATTTGAAAT GGGCAAGATTCCCTAAGAGT GATGGAACCTGGTACTATCTA TACAGAACTGGGAACCACTT 12900  
12901 TAGGTTTGTACAGCAATGCA CTTAAAGGCTTAAAGTGAA GTATTATACTTTTAAAG GATTAAACAACCTAAATAGA GGTATGGTACTTGGTAGTTT 13000  
13001 AGCTGCCACGATGAGCTCTAC AAGCTGGTAAATGCAACAGAA GTGCGTGGCAATTCACACTGT ATTAATCTTCTGTGCTTTTG CTGTAGATGCTGTCAAAGCT 13100  
13101 TACAAGAATTATCTAGCTAG TGGGGGCAACCAATCTGA ATTTGTAAAGATGTGTGT ACACACACTGGTACTGGTCA GGCAATAAGTTACACCGG 13200  
13201 AAGCCAATATGGATCAAGAA TCCTTTGGTGGTGCAATCGT TTGTCGTACTGCGGTTGCC ACATAGATATCCAAATCTT AAAGGATTTTGTGACTTAAA 13300  
13301 AGGTAAGGTATGTACAAATAC CTCATGATCTGTGCTAATGAC CTTTGAAGTTTACACTTAA AAACACAGTCTGACCGTCT CGCGTATGTGGAAAGGTTAT 13400  
13401 GGCTGTAGTTGTGATCAACT CGCGGAACCCATGCTTCAGT CAGCTGTATGACACAATCGTTT TTAACCGGGTTTGGCGGTGA AGTGACAGCCGCTTACACC 13500  
13501 GTGCGGCACAGGCACTAGTA CTGATGCGGTATACAGGGCT TTTGACATCTACAATGATAA AGTAGCTGTGTTTGTCTAAAT TCCTAAAAACTAATTTGTTG 13600  
13601 CGCTTCCAAGAAAAGGACGA AGATTGACAAATTTAATGATT CTTACTTTGTAGTTAAGAGA CACACTTTCTTCTAACTACCA ACATGAAGAAACAATTATA 13700  
13701 ATTTACTTAAAGGATTGTGCA GCTGTTGCTTAAACATGACT CTTTAAAGTTTGAAGATAGACG GTGACATGGTACCAATATA TCACGTCAACGCTTACTAA 13800  
13801 ATACACAATGGCAGACCTGCT TCTATGCTTTAAGGCAATTTT GATGAAGGTAATTTGTGACAC ATTAAGAAAGAAATCTGTCA CATACAATTTGTGTGATGAT 13900  
13901 GATTATTCTCAATAAAAAAGT CTGGCAATGTTTGTAGAAA ACCCAGATATATTACCGCTA TACGCCAACTTAGGTGAACG GTGACGCCAAGCTTTGTGTA 14000  
14001 AAACAGTACAATTTCTGTAT GCCATTGCGAAATGCTGTGAT TGTGGTGTACTGACATTAG ATAATCAAGATCTCAATGGT AACTGGTATGATTTCGGTGA 14100  
14101 TTTACTGAAGTGCAGCCGAG GTAGTGGAATTCCTGTGTA GATTCCTTATTAATCATGTT AATGCCTATATTAACCTTGA CCAGGCGCTTAACTGCAGAG 14200  
14201 TCACATGTGACACTGACTT AACAAGAGCTTCAATTAAGT GGGATTGTGTAATATGAC TTCACGGGAAGAGAGGTGAAA ACTCTTTGACCGCTTATTTTA 14300  
14301 AATATTGGATGACAGACTAG CACCCAAATTTGTGTTAACT TTTGGTAGACAGTCAATTC TGCATTTGTGCAAACTTTAAT GTTTTATCTTCTACAGTGT 14400  
14401 CCCACCTCAAGTTTTGGAC CACTAGTGAAGAAAATATTT GTTGAATGGTGTCCATTTGT AGTTTCAACTGGATACCCT TCAGAGAGCTAGGTGTGTA 14500  
14501 CATACTCAGATGTAAACTT ACATAGCTTACAGTATGTA TTAAGGAATCTTGTGAT CGTGCTGACCTGCTATGCA CGCTGCTCTTGTAATCTAT 14600  
14601 TACTAGATAAACGCATACG TGCTTTTCACTAGCTGCACT TACTAACAATGTTCCTTTT AAACGTGCAAAACCCGGTAAT TTAACAAGAACTTCTATGA 14700  
14701 CTTTGTGCTGTCTAAGGTTT GTTGAAGGAAGGAATTTCT GTTGAATTAACAAACATCTT CTHTGCTAGGTGGAATG CTGCTATCAGCGATTATGAC 14800  
14801 TACTATCGTTATAATCTACC AACAATGTCTGATATCAGAC AACTACTATTGTACTTGAA GTTGTGATAAGTACTTTGA TTGTTACGATGGTGGCTGTA 14900  
14901 TTAAGTGTCAACCAAGTCATC GTCAACAACCTAGACAATCT AGCTGGTTTTCCATTTAATA AATGGGTTAAGGCTAGACTT TATTATGATTCAATGAGTTA 15000  
15001 TGAGGATGCAAGTGAAGTTT TGCATATACAAACAGTAAT GTCATCCCTACTATAAACCCA AATGAATCTTAAAGTATGCCA TTAGTGCAAAGAATAGAGCT 15100  
15101 CGCACCGTAGCTGGTGTCTC TATCTGTAGTACTATGACCA ATAGACAGATTTCAATAAAAA TTTATGAAATCAATAGCCCG CACTAGAGGAGCTACTGTAG 15200  
15201 TAAITGCAACAAGCAAAATCT TATGGTGGTTGGCAACAACAT GTTAAAAAACCCTTATATAGT ATGTAGAAAACCCTTCACTT ATGGGTTGGGATTATCTAA 15300  
15301 ATGTGATAGAGCCGATGCTCA ACATGCTTGAATATGCGCC TCACTTGTTCTTGCTCGCAA ACATACAACGTTGTGTAGCT TGTCAACCCGTTTCTATAGA 15400  
15401 TTGCTAATGAGTGTGCTCA AGTATGGATGTGAATGTGCTA TGTGGCGGTTGCTCATAT ATGTAAACAGGTGGAACTTC ATCAGGAGATGCCACAAC 15500  
15501 CTTATGCTAATAGTGTTTTT AACATTTGTCAACGCTGTAC GGCCAATGTAATGCACTTT TATCTACTGTAGTGAACAAA ATTTGCCGATAAGTATGCCG 15600  
15601 CAATTTACAAACACAGACTT TTAGTGTGCTCTATAGAAAAT AGAGATGTTGTCACACAGACT TGTGAATGAGTTTACGCAAT ATTTTGGCAACATTTTCTCA 15700  
15701 ATGATGACTCTCTCGAGCA TGCTGTGTGTGTGTTTCAATA GCACTTATGCAATCTAAGGT CTAGTGGCCAGCATAAGAAA CTTTAAAGTCAGTTCTTTAT 15800  
15801 ATCAAAACAATGTTTTTATG TCTGAAGCAAAATGTGGAC TGAGACTGACCTTACTAAAG GACCTTCAATTTGTCTCT CAACATACATAGCTAGTTAA 15900  
15901 ACAGGCTGATGATTATGTGT ACTTCTCTTACCCAGATCCA TCAAGAATCTCAGGAGCCGG CTGTTTTGTAGATGATATCG TAAAAACAGATGGTACACT 16000  
16001 ATGATTGAACCGTGTCTGTC TTAGTGTATAGTCTGTTGAC CACTTACTAATCACTTAAT CAGGAGTATGCTATGCTTT TCAITTTGTAATTACAATACA 16100  
16101 TAAGAAAGCTACATGATGAT GTTAACAGGACACATGTTAGA CATGTAATCTGTATATGCTTA CTAATGATAACACTTCAAGG TAITTGGAAACCTGAGTTTAA 16200  
16201 TGAGGAGTATGTACACACCGG ATACAGTCTTACAGCTGTT GTGGGCTTGTGTTTGTGCAA TTACAGACTTCAATTAAGAT GTGGTGTCTTGCACTGATA 16300  
16301 CCAATTTCTATGTTGTAATG CTGTACGACGAAGGTCATAT CAACATCACATAAATTAGTC TTGCTGTAAATCCGATATG TTGCAATGCTCCAGGTGTGTG 16400  
16401 ATGTCAAGATGTGACTCAA CTTTACTTAGGAGGTATGAG CTATATTGTGTAATCACATA AACCACCCATAGTTTTCCTA TTGTGTGCTAATGGACAAGT 16500  
16501 TTTTGGTTTTATAAAAAATA CATGTGTTGGTAGGATAAT GTTACTGACTTTTAATGCAAT TGCAACATGTGACTGGACAA ATGCTGGTGATTACATTTTA 16600  
16601 GCTAACCTGATCTAGTGAAAG ACTGAAGCTTTTTTGGCAGCAG AAACGCTCAAAAGCTACTGAG GAGACATTTAAACTGTCTTA TGGTATTGCTACTGTACGTG 16700  
16701 AAGTCGTCTGTACGAGAGAA TTACTCTTTTACGGGAAAG TTGTAACCTGACAAGCTG GATCGGAAATATGTCTTT ACTGGTTATCTGTGAACCTAA 16800  
16801 AAACAGTACAAGCTACAATAAG GAGAGTACACCTTTGAAAAA GGTGACTATGGTATGCTGT TGTTTACCGAGGTACAACAA CTTACAATAAATGTTGGT 16900  
16901 GATTATTTTGTCTGACATCT ACATAGCAATGATGCCAATTA GTGCACCTACACTAGTGCCA CAAGAGCACTATGTTAGAAT TACTGGCTTATACCCAACAC 17000  
17001 TCAATAITCTCAGTGAAGTTT TCTAGCAATGTGTGCAATTA TCAAAAGGTTTGGTATGCAAA AGTATCTACACTCCAGGGA CCACTGGTACTGTGAAGAG 17100  
17101 TCAATTTGCTATTTGGCCTAG CTCTTACTATCCCTTCTGT CCGATAGTGTATACAGCTTG CTCTATGCGCGCTGTTGATG CACTATGTGAGAAGGCATTA 17200  
17201 AAAATTTTGGCTATAGATAA ATGTAGTAGAATTTATACCTG CAGGTGCTCTGTAGAGTGT TTTGATAAATTCAAAGTGAA TTCAACATTAGAACAGTATG 17300  
17301 TCTTTTGTACTGTAAATGCA TTGCTGTAGACGACAGCAGA TATGTTGTTCTTTGATGAAA TTTCATGTGCCACAAATTAAT GATTTGAGTGTGTCAATG 17400  
17401 CAGATTACGTTGCTAAGCACT ATGTGTACATTTGGGCGACCTT GCTCAATTAACCTGCAAGTGC CACATTGTCTAACTAAGGGCA CACTAGAACCAGAAATATTC 17500  
17501 AATTCAGTGTGTAGACTTAT GAAATCTTATAGGTCCAGACA GTTCCCTCGGAACCTGTGCG CGTTGTCTGTGAAATTTGT TGACACTGTGAGTGTCTTGG 17600  
17601 TTTATGATAAATAAGCTTAAA GCACATAAAGACAATACAGT TCAATGGCTTAAATGTTTT ATAAGGGTGTATACAGCAT GATGTTTCACTGCAATTTAA 17700  
17701 TAGGCGCAAAATGAGGTTGG TAAGAGAATTTCTTACAGT AACCTGTCTGGAGAAAAGC TGTCTTTATTTTCACTTATA ATTCACAGAATGCTGTAGCC 17800  
17801 TCAAAAGATTTTGGGACTACC AATTCCAAATGTTGATTCAT CACAGGGCTCAGAATATGAC TATGTCATATTCACTCAAAC CACTGAAACAGCTCACTCTT 17900  
17901 TGTATGTAAACAGATTTAAT GTTCTATTTACAGGACAAAA AGTAGGCATCTTTGCATAA TGTCTGATAGAGACCTTTAT GACAAGTTGCAATTTTACAAG 18000  
18001 TCTTGAAATTTCCAGCTAGGG ACTTGGCAACTTTTCAAGCT GAAAATGTAAACAGGACTCTT TAAAGATTGTAGTAAGGTAA TCACTGGGTTACATCTCTA 18100  
18101 CAGGCACTCAACACCTCAG TGTTGACACTTATGAACTAAAA CTGAAGGTTTGTGTTGTC ATACCTGGCATAAGGA CATGACCTTATAGAAGACTA 18200  
18201 TCTCTATGTAGGGTTTTTAAA ATGAAATATCAAGTAATGTT TTAACCTCAACATGTTTATA CCGCGAAGAAAGCTATAAGA CATGTACGTGCATGGATTGG 18300  
18301 CTTTGTATGTCGAGGGGTGTC ATGCTACTAGAGAAGCTGTG GTTACCAATTAACCTTTTACA GCTAGGTTTTTCTACAGGTG TTAACCTAGTTGCTGTACT 18400  
18401 AAGGATTTGATTTGATACACC TAAATATACAGATTTTTCFA GAGTTAGTGCTAAACCACCG CCTGGAGATCAATTTAAACA CCTCATACCATTATGTACA 18500  
18501 ACACGCTTCTCTGGAATGTA GTGGGTATAAAGATTGTACA AATGTTAAGTGACACACTTA AAAATCTCTCTGACAGAGCT TATTTGTTCTTATGAGCACA 18600  
18601 TGGCTTTGAGTTGACATCTA TGAAGTATTTTGTGAAAAA GGACCTGAGCGCACCTGTTG TCTATGTGATAGACGTGCCA CATGCTTTTCCACTGCTTCA 18700  
18701 GACACTTATGCTCTTGGGCA CAAITCTTGTGGAATTTGAT ACGTCTATAATCCGTTTTATG ATTGATGTTTACAACATGGGG TTTTACAGGTAACTCAAAA 18800  
18801 GCAACCATGATCTGATTGTG TAGTCATGTGTAATGCACA TGAGTACTGTGTGATGTCAA TCTAGTACTAGGTGTTAGCT GTCCAGGAGTGTCTTGTAA 18900  
18901 CGCTGTTGACTGCACTATTG AATATCTCAATTTGTTGAT ACCTGAAGATTAATCGCGG TTGTAGAAAGGTTCAACACA TGGTTGTTAAAGCTGCATTA 19000  
19001 TTAGCAGACAAATCCCAGT TCTTACGACATTTGGTAACC CTAAGCAATTAAGTGTGTA CCTCAAGCTGATGTAGAATG GAAGTTCTATGATGCACAGC 19100

19101 CTTGTAGTGACAAAAGCTTAT AAAATAGAAGAATTATTCTA TTCTTATGCCACACATTCTG ACAAATTCACAGATGGTGTA TGCCTATTTTGGAAATTGCAA 19200  
19201 TGTCGATAGATATCTTGCTA ATTCACATTTGTTTGATAGTT GACACTAGGAGTGCTATCTAA CCTTAACCTTGCCCTGGTTGTG ATGGTGGCAGTTTGTAATGA 19300  
19301 AAAATACACATGCATTCGCAC ACCAGCTTGTGATAAAAAGTG CTTTGTGTTAAATTA AAAACAA TTACCATTTTTCATTATCTC TGACAGTCCATGTGAAGTCTC 19400  
19401 ATGGAAAAACAAGTAGTTGCA GATATAGATATTATGTACCCT AAAGTCTGCTACGTGTATATA CACGTTGCAATTTAGGTGGT GCTGCTGTGTAGACATCATGC 19500  
19501 TAATGAGTACAGATTGTATC TCGATGCTTATAACATGATG ATCTCAGCTGGCTTTAGCTT GTGGGTTTACAACA AATTGT ATACTATAACCTCTGGAAC 19600  
19601 ACTTTTACAAGACTTCAGAG TTAGAAAAATGTGGCTTTTA ATGTGTGTAATAAGGGGACAC TTGTATGGGACAACAGGGTGA AGTACCAGTTTCTATCAITA 19700  
19701 ATAACACTGTTTACACAAAA GTTGATGGTGTGTATGTAGA ATTGTTTGAAAAATAAAAACAA CATTACCTGTTAATGTAGCA TTGAGCTTTGGGCTAAGCG 19800  
19801 CAACATTAAACCAGAAGTCG GATCGTAGCCACTCAATAAT TTGGGTGTGGACATTTGCTGC TAATACTGTGATCTGGGACT ACAAAAGAGATGCTCCAGCA 19900  
19901 CATATATCTACTATTGGTGT TTGTTCTATGACTGCACATAG CCAAGAAACCAACTGAAACG ATTTGTGCCACACTCACTGT CTTTTTGTAGGTAGAGTTG 20000  
20001 ATGGTCAAGTAGACTTATTT AGAAATGCCCGTAATGGTGT TCTTATTACAGAAGGTAGTG TTAAGGGTTTACAACCATCT GTAGGTCCTCAACACAGCTAG 20100  
20101 TCTTAATGGAGTACACTTAA TTGGAGAAGCCGTCAAAAACA CAGTTCAATATTATAAGAA AGTTGATGGTGTGTGCCAAC AATTACCTGAAACTTACTTT 20200  
20201 ACTCAGAGTAGAAATTTACA AGAATTTAAACCCAGGAGTC AAATGGAAATTGATTTCTTA GAATTAGCTATGGATGAATT CATTGAACGGTATAAATTAG 20300  
20301 AAAGGCTATGCCITCGAACAT ATCGTTTATGGAGATTTTAG TCATAGTCAGTIAGGTGGTT TACATCTACTGATTGGACTA GCTAAACGTTTTAAGGAATC 20400  
20401 ACCTTTGTGAATTAGAAGATT TTATTCCTATGGACAGTACA GTTAAAACTATTTCATAAC AGATGCGCAACACAGGTTTCA TTAAGTGTGTGTGTTCTGTT 20500  
20501 ATTGATTTTAACTTGTATGA TTTGTGTGAAATAATAAAAT CCCAAGATTATTCTGTAGTT TCTAAGGTTGTCAAAGTGAC TATTGACTATACAGAAATTT 20600  
20601 CATTTATGCTTTGGGTGAAA GATGGCCATGTAGAAACATT TTACCCAAAAATTACAATCTA GTC AAGCGTGGCAACCCGGGT GTTGCTATGCCTAACTTTA 20700  
20701 CAAAATGCAAAAGATGCTAT TAGAAAAAGTTGATGCTAAA AATTATGTAGATGTCGAAC ATTACCTAAAGGCATAATGA TGAATTCGCAAAANATACT 20800  
20801 CAACGTGTCTCAATATTTAAA CACATTAACATTAGCTGTAC CCTAATATGAGAGATTATA CATTTGGTGCTGTGTTCTGA TAAAGGAGTTGCACCAGTA 20900  
20901 CACTGTGTTTGAAGCAGTTG TTGCCATTGAGTACCGCTGT TCAAGTCTGATGACATCTTAATG ACTTTGTCTCTGATGCAGAT TCAACTTTTATGTGTATTG 21000  
21001 TGCAACTGTACATACAGCTA ATAAATGGGATCTCATTATT AGTGATATGACGACCCTAA GACTAAAAATGTACAAAAAG AAAATGACTCTAAAGAGGTT 21100  
21101 TTTTTCACCTAATTGTTGG GTTTATACAACA AAAAGTAG CTCTTGAGAGTTCCGTGGCT ATAAAGATAACAGAACATTC TTGGAATGCTGATCTTTATA 21200  
21201 AGCTCATGGGACACTTTCGA TATGTGGACAGCTTTGTAT TAATGTGAATGGCGTCATCAT CTGAAGCAATTTTAAATTGGA TGTAAATATCTTGGCAAAAC 21300  
21301 ACGGCAACAAATAGATGGTT ATGTCTATGATGCAAAATCT ATATTTTGGAGGAATACAAA TCCAATTCAAGTTGCTCTCT ATTCCTTAATTGACATGAGT 21400  
21401 AAATTTCCCTCTTAATTAAG GGGTATGCTGTGTAATGCTT TAAAAGAAAGGTCAAAATCAAT GATATGATTTTATCTCTTCT TAGTAAAGGACTATATAA 21500  
21501 TTAGGAAAAACAACAGAGTT GTATTCTCTAGTGAATTTCT TGTTAAACACTAAACGAAACA ATGTTGTTGTTTCTGTGTTT ATTTGCTACTAGTCTCTAGT 21600  
21601 ATGTGTGTTAATCTTACAAC AGAAGCTCAATTACCCCTCTG ATACACTAATCTTTCACAC GTGGTGTTTATTACCTTGAC AAAGTTTTCAGATCTCTCAGT 21700  
21701 TTATCTTCACTCACTCAGGACT TGTTCTTACCTTCTTCTTCC ATGTTTACTTGGTTCATGC TATACATGTCTCTGGGACCA ATGGTACTAAGAGGTTTGTAT 21800  
21801 AACCCCTGTCTACCACTTAA TGATGGTGTGTTATTTTCTT CCAGTGAAGAGTCTAACATA ATAAAGGGCTGGATTTTGG TACTACTTTAGATTCCGAAGA 21900  
21901 CCCAGTCCCTACTTATTGTT AATAACGCTACTAATGTTGT TATTAAGTCTGTGAATTTTC AATTTTGTAATGATCCATT TTGGGTGTTTATTACCAACA 22000  
22001 AAACAAACA AAAAGTGGTAGG AAAGTGAAGTTCAGAGTTTAT TCTAGTGGCAATAATTGCAC TTTTGAATGTGCTCTCAGC CTTTTCTTATGGACCTTGAA 22100  
22101 GGA AAAACAGGGGAATTTCAA AAATCTTATAGGAATTTTGTG TTAAGAATATTATGATGGTTAT TTTAAAAATATATTCTAAGCA CACGCCATTATTAATTAGTGC 22200  
22201 GTGATCTTCCCTCAGGTTT TTTCGCTTTAAGAACCATTTGT AGATTTGCCAATAGGTATTA ACATCACTAGGCTTCAAACT TTAAGTGTCTTACATAGAAG 22300  
22301 TTAATTGACTCTCGGTGATT CTCTCTCAGGTGGACAGCT GGTGCTGACGCTTATTAATG TGGTATCTTCAACCTAGGA CTTTCTCTATTAATAATAAT 22400  
22401 GGAATGGAACCAATTACAGA TGCTGTAGGATGTGCACTTG ACCCTCTCAGAAACAAAG TGATCGTTGAAATCTTACAC GTAGAGAAAAGGAATCTATC 22500  
22501 AAACCTTTAACTTTAGAGTG CAACCAACAGAAATCTATTTG TAGATTTCCATAATTATCAAA ACTTGTGCCCTTTTGGTGAA GTTTTAAACGCCACCAGATT 22600  
22601 TGCACTGTGTTATGCTTGGG AAGCTGAGCAAGATTCAGAAC TGTTGTGCTGATTTATCTGT CCTATATAATTCCGCATCAT TTTCACCTTTTAAAGTGTAT 22700  
22701 GGAAGTCTCTCTACTAAAT AAATAGTCTCTGCTTTACTA ATGTCTATGCGAGATTCATT GTAATTAGAGGTGATGAAGT CAGACAAATCGCTCCAGGGC 22800  
22801 AAAGTGTGAAAGATGTGCTAT TATAATTATAAATACCAGGA TGAITTTACAGGCTGGGTTA TAGCTTGGAAATCTAACAAAT CTTGATTCTAAGGTTGGTGG 22900  
22901 TAATTATAATTACTGTATA GATTTGTATTAGAAAGTCTAAT CTCAACACCTTTTGGAGAGAGA TATTTCAACTGAAATCTATC AGGCCGGAAGCACACCTTGT 23000  
23001 AATGGTGTGGAAGGTTTAA TTGTACTTTCTCTTCAAT CATATGGTTTCCAACCCACT AATGGTGTGGTTACCAACC ATACAGAGTAGTAGTACTTT 23100  
23101 CTTTGTGAATCTCTACATGCA CAGCAACCTGTTTGGGACC TAAAAAGTCTACTAATTTGG TTA AAAACAATATGGTGTCAAT TTCAACTTCAATGTTTAAAC 23200  
23201 AGGCACAGGTTCTTACTTG AGTCTAACAAAAGTTCTCG CTTTTCAACAAATTTGGCAG AGACATGCTGACACTCTG ATGGCTTCCGTGATCCACAG 23300  
23301 ACACITGAGATTCTTGACAT TACACCATGTCTTTTGGTG GTTGCTAGTGTATAACCCA GAAGTCGATACTTCTAACCA GGTTGCTGTCTTTATCAGG 23400  
23401 ATGTAACTGTCACAGAAGTC CACTGTGCTATTCATGACA TCAACTTACTCTTACTTGGC GTGTTTATCTACAGGTTCT AATGTTTTC AAACACAGCTGC 23500  
23501 AGGCTATGTTTATAGGGGCTG AAGCATGTACAACACTCAT ATAGGTGACATAACCCATTGG TGCAGGTATATCGGCTAGTT ATCAGACTCAGACTAATTTCT 23600  
23601 CCCCCCGGGCAGGTAGTGT AGTACTGATCAATCCATCATTTG CCTACACTATGTCACTTGGT CGAGAAAATTCAGTTGCTTA CTCTAATAACTCTATTGCCA 23700  
23701 TACCCACAATAATTTACTATT AGTGTATCCACAGCAAGTTCT ACCAGTGTCTAAGCAACAAGA CATCAGTAGATTGTACAATG TACATTGTGGGTGATTCAAC 23800  
23801 TGAATTGCAAGCAATCTTTTG TGC AATATGGCAGTTTGTG ACACAATTA AACCCGTTGTTT AACTTGAATAGCTGTTGAAC AAGACAAAAACACCCAAGAA 23900  
23901 GTTTTGTGCACAAATGCAAAA AATTTACAAAACACCAACCAA TAAAGATTTTGTGGTGTTT AATTTTTCACAAATATACC AGATCCACTAAAACCAAGCA 24000  
24001 AGAGGTCTAATTTAAGAAAT CTACTTTTCAACAAAATGTAC ACTTGCAGATGTGGCTTCA TCAAAACAATATGGTGATGTC CTTGGTGATATTGCTGCTAG 24100  
24101 AGACACATTTTGTGCACAAA AGTTTAAACGGCTTACTTGT TTGCCACCTTTGCTCACAGCA TGAAATGATTTGCTCAATACA CTTCTGCACTGTTAGCGGGT 24200  
24201 ACATCACTACTTCTGGTGGAC CTTTGGTGCAAGTGCTGCAT TACAATAACCATTTGCAATG CAAATGGCTTATAGGTTTAA TGGTATTGGAGTTACACAGA 24300  
24301 ATGTTCTCTATGAGAACCAA AAATGATTTGCTGCAACCAAT TAATAGTCTTATTTGGCAGAAA TAAAGACTACTTCTTCTCC ACAGCAAGTGCACTTGGAAA 24400  
24401 ACTTCAAGATGTGGTCAACC AAAATGCAACAAGCTTTAAAC ACGCTTGTTAAACAACATTAG CTCCAATTTTGGTGCAATTT CAAGTGTTTTAAATGATATC 24500  
24501 CTTTACGCTCTTGACAAAGT TGAGGCTGCAAGTGCATTTAG ATAGGTTGATTCACAGGCAGA CTTCAAGATTTGACAGACATA TGTGACTCAACAATTAATTA 24600  
24601 GAGCTGCGAAGAAATCAGAGCT TGTGCTGATCTTGTGCTGAC TAAAATGTCACTCCGACTTC TTGGACAATCAAAAAGAGTT GATTTTGTGGAAAAGGGCTA 24700  
24701 TCACTTATGTCTCTCCCTC AGTCAGCACCTTCAATGGTGA GTCTTCTGATGTGACTTA TGCCCTGACACAGAAAAGA ACTTCACAAGTCTCTGCC 24800  
24801 AAGTCGGATGATGGA AAAAGC ACACCTTCTCGTGAAGGGT TCTTTGTTTCAAAATGGCACA CACTGGTTTGTAAACAAAAG GAATTTTATGAACCAACAAA 24900  
24901 TCAATTACTACAGACAACATA TTGTGTCTGTGAAGTGGA TGTGTAATAGGAATTTGCTA ACAACACAGATTTATGATCCT TGTCAACCTGAATTAGACTC 25000  
25001 ATTTCAAGGAGGATGTAGATA AATATTATTAAAGATCATACA TCAGCAGATGTTGATTTAGG TGACATCTCTGGCATTAAATG CTTCAAGTTGTAACCAATTCAA 25100  
25101 AAAGAAATTTGACCCGCTCAA TAGGGTTGCTGCAAGATTTAA ATGAATCTCTCATGCACTC CAAGAACCTTGGAAAAGTATGA GCAGTATATAAAATGGCCAT 25200  
25201 GGTCACTATTGGCTAGGTTT ATAGCTGGCTTGATTGCCAT AGTAAATGGTGACAATTATGC TTGTGCTGATGACCAAGTTGC TGTAGTTGTCTCAAGGGCTG 25300  
25301 TTTCTTCTTGATGCTCTGCT GTGATTTGTTGAAGACGAC TCTGAGCCAGTGCTCAAAGG AGTCAAAATACATTACACAT AAACGAACTTATGGATTGTG 25400  
25401 TATGAGAAATTTTCAACAAAT GGAAGCTGTAACTTTGAAGCA AGAGTGAATAACAGGATGCTA CTCCTTCAGATTTTGTTCGC GCTACTGCAACGATACCGAT 25500  
25501 ACAAGCCTCACTCCCGCTG GACTTCTGATTTTGGCGTT GCACTTCTGCTGTTTCTTCA GAGCGCTTCAAAAATCAAA CCTTCAAAAAGAGATGGCAA 25600  
25601 CTAGCACTCTCCAAGGGTGT TCACTTTGTTGCCAAGTTGC TGTGTGTTGTTGTAACAGTT TACTCAAGTCGGAATCTCGT TGTCTGCTGGCTTGAAGCCC 25700  
25701 CTTTCTCTAATTTTATGCT TTAGTCTACTTCTTGCCAGAG TATAAAGCTTTGAAGAATAA TAATGAGGCTTTTGGCTTTGC TGGAAATGCCGTTCCAAAA 25800  
25801 CCGCTAATCTTATGATGCCA ACTTAATTTCTTGTGCGCAT ACTAATGTGTAGGACTAATTG TATACCTTACAATAGTTGAA CTTCTTCAATTTGCTAATCT 25900  
25901 TCAGGTGATGGCAACAAAG TCTTATTTCTGTAACATGACT ACCAGATTTGGTGGTTATAT GAAAAATGGGAATCTGGAGT AAAAGACTGTGTGTTATTAC 26000  
26001 ACATTTACTTCTGATCTACAG TATTACGTTTGGCTACTACAA TCAATTGAGTACAGACACTG GTGTTGAAACATGTTACTTCT TCACTTACAATAAAATTTG 26100  
26101 TGATGAGGCTGAAGAACATG TCCAAAATTCACACAATGCAC GGTTCATCCGGAGTGTGTTA TCCAGTAATGGAACCAATTT ATGTATGAACCGCAGCAGCAT 26200  
26201 ACTAGCGTGGCTTTGTAGAG ACAGGCTGACGAGTAGCAAC TTATGACTACTTCGTTTTCG GAAGAGACAGGTACGTTAAT AGTTAATAGGCTACTTCTTT 26300  
26301 TTTCTGCTTTGCTGGTATTC TTGCTAGTTTACACTAGCCAT CCTTACTGGCATCGATTGT GTGCGTACTGCTGCAATATT GTTAACGTGAGCTTGTGAAA 26400  
26401 ACCCTCTTTTACGTTTACT CTGCTGTGTTAAAAATCTGAAT TCTCTAGGATTCCTGATCT TCTGGTCTAAACGCAATAAA TAITATATTAGTTTCTGT 26500  
26501 TTGGAACATTTAATTTTAGCG ATGGCAGATTCCCAACGGTAC TAITTACGTTGAAGAGCTTA AAAAGCTCTCTGAAACAATG ACCTAGTAATAGGTTTCTCT 26600  
26601 ATCTTCTATCGGATTTGTCT TCTTCAATTTTGGATGTC AACAGGAATAGGTTTGTGA TATAATTAAGTTAATTTTCT TCTGGCTGTATGGCCAGTA 26700  
26701 ACTTTAGCTTTGTTTGTGCT TGCTGCTGTTTACAGAAATA ATTGGATACACCGGTGGAATT GCTATCGCAATGGCTGTGCT TTAGGGCTGTATGTGGCTCA 26800  
26801 GCTACTTCACTGCTTCTTCT AGCTGTTGTTGGCTTGGCTCT CCGACTTTTGTCTATTCAATC CAGAAACTAACATTTCTCTC AAGCTGCCACTCCATGGCAC 26900  
26901 TATTTCTGACCACGCGCTTCT TAGAAAGTGAAGTCTGTAAT GGAAGCTGTGATCTCTTCTGCG ACATCTCGTATTGTCTGGAC ACCATCTAGGACGCTGTGAC 27000  
27001 ATCAAGGACCTGGCAAAAAGA AATCACTGTGTGTACATATC GAAAGCTTTCTTATTACAAA TTGGGAGCTTCGCAGCGGTGT AGCAAGGTGACTCAGGTTTGT 27100  
27101 CTGCTACAGTCTGCTACAGG ATTTGGCAACTATAAATTAAC CACAGACCATTTCCAGTAGCA GTGACAATATGCTTTGCTT GTACAGTAAGTGACAACAGA 27200  
27201 TGTTTTCACTCTGTGATCTT CAGGTACTATAGCAGAGAT ATTACTAATTATTAAGGA CTTTAAAGATTTCATTTGG AATCTTGATTACATCATAAA 27300  
27301 CTTCTATAATTA AAAATTTAT TAAAGTCACTAAGTGAAGT AAATATTCTCAATTAGATGA AGAGCAACCGATGGAGATTG ATTAACGCAACATGAAAAT 27400  
27401 ATTAGCTATTGTGCACTGCA ATTTGGCTACTTGTGAGT TTATGACTACCAAGAGTGT GTTAGAGGTACAACAGTACT TTTAAAGAAACCTTGTCTTT 27500  
27501 CTGGAACATACAGGAGGCAAT TCAACCATTTCACTCTTACG TGATAACAAATTTGCACGTA CTTGCTTTAGCACTCAATTT GCTTTTGTCTGTGCTGACGG 27600  
27601 CGTAAACACAGTCTATCATG TACGTGGCAGTACGATTICA CTTAAAGTGTTCATCAGACA AGAGGAAGTTTCAAGAACTTT ACTCTCAAAATTTTCTTATT 27700  
27701 GTTGGCCGAATAGTGTTTAT AACCTTTGCTTCACTACA TAAAGAAGACAGAAATGATT AACTTTCAATTAATTGACTTCT TATTGTGCTTTTATAGCCTT 27800  
27801 TCTGCTAATCTCTGTTTAAA TTACTCTTATTAATCTTTTG TTCTCACTTGAAGTCAAGA TCAATAATGAAACTTGTACG CCGAAACGCAATGAAATTT 27900  
27901 CTTGTTTCTTACGAAATCAT CACAACCTGTAGCTGATTC ACCAAGAATGTAGTTTACAG TCAATGTACTAACATCAACC ATATGTAGTTGATGACCCGT 28000  
28001 GTCTTACTACTCTTATCTT AATGTTGATATAGAGTAGG AGCTAGAAAATTACGACCTTT TAATTGAATTTGCGCTGGAT GAGGCTGGTTTCTAAATCACC 28100  
28101 TACTCAGTACATGATATCTG TAATTTAGATGAGTTTCTGT TTACTTTTACAAATTAATG CCAGGAACCTAAATTTGGGTA GTCTGTGAGTGGCTGTTCG 28200  
28201 TTTATGAGAGACTTTTATAGA GTATCATGACGTTCTGTGTG TTTTAGATTTCATCTAAACG AACAAACTAAAATGTCTGAT AATGGACCCCGGAAATCAGCG 28300  
28301 AAATGACCCCGCATTTAGT TTGTGGACCCCTCAGGTTA ACTGGCAGTACACAGAATGG AGAAGCGAGTGGGGCGGAT CAAAACAACGTCCGCCCAA 28400  
28401 GTTTTATCCCAATAATATCTG GTTCTGTGTTACCCGCTTCA CTTCAACATGGCAAGGAAGCT CTTAAATTCCTCTGAGGACA AGGCGTCCAATTAACACCA 28500  
28501 ATTAGAGGACCTGATGACAAA ATTTGGCTACTCCGAAGAGC TACCAGACAAATCTGTGGTG GTGACGGTAAATGAAAGAT CTACGTCCAAAGTGTATT 28600  
28601 CTACTACTTAGGAATCTGGCG CAGAAGCTGGACATCTCCAT GTTGCTAAACAAAGACCGCAT CATATGGTGTGCAACTGAGG GAGCCTTGAATACACCAAAA 28700  
28701 GTATCATATCTGACCCGCAA TCTCGTCAACAATGCTGCTAA TCGTGTCAACAATCTTCTCAA GGAACAACAATTGCCAAAAGG CTTCTACGAGAAGGGAGCA 28800  
28801 GAGGCGCGAGTCAAGGCTCT TCTCGTCTCTATCAGCTAG TCGCAACAGTTCAAGAAATTT CAACCTCAGGCAGCAGTAGG GGAACCTTCTCTGCTAGAAT 28900  
28901 GGCCTGGCAATGGCGGTGAT GCTCTCTTGTCTTGTCTGTG CTTGACAGATTTGAACACAGT TGAGAGCAAAAATGTCTGGTA AAGGCCAACAAACAAGGC 29000  
29001 CAAACTGTCACTAAGAAATG TGTGCTGAGGCTTCTAAGA AGCTCGGCAAAAACGTA CTGCCCTAAAGCATACAATG AACACAAGCTTTTCCGACAG 29100  
29101 GTGTGTCAGCAACAAAACCAA GGAATTTTGTGGGACAGGA ACTAATGTCAAGCAAGGAAGT ATTACAAACATTGGGCGCAA ATTGCAAAATTTGCCCCAG 29200  
29201 CGCTTCAGGCTTCTTCGGAAT GTTGGCCGATTTGGCATGGA GTCAACACTTCGGGAACGTG GTTGACCTACACAGGTGCCA TCAAAATTTGGATGACAAAGAT 29300  
29301 CCAAATTTCAAAGATCAAGT TTTTCTTCTGAATAAGATA TTGACGCATCAAAAACATTC CCACCAACAGAGCCTAAAAA GGACAAAAAGAAAGAGGCTG 29400  
29401 ATGAAACTCAAGCCTTACCG CAGAGACAGAAGAAACAGCA AACTGTGACTCTTTTCTGTG CTGACGATTGTGATTTTC TCCAAAACAATTGCAACAATC 29500  
29501 CATGACAGAGTGTGACTACCA CTACGGCTTAAACTATGCA GACCAACAAGGCAGATGGG CTATATAAACGTTTTCGCTT TTCCGTTTACGATATATAGT 29600  
29601 CTACTCTTGTGCGAATGAA TTCTCGTAACTACATAGCAC AAGTAGATGTAGTTAACTTT AATCTCACAATAGCAATCTTT AATCAGTGTGTAACATTAGG 29700  
29701 GAGGACTTGAAGAGGCCACC ACATTTTACCGAGGCCACG CGGAGTAGCATCGAGTTGAC AGTGAACAATGCTAGGGAGA GCTGCCTATATGGAAGGCC 29800

29801 CTAATGTGTAAAAATTAATTT TAGTAGTGCTATCCCCAAGT CGGATTAATAGCTTCTTAGG AGAATGACAAAAAAAAAAAAA AAAAAAAAA 29889

1.8. *SRR11092062 Discovered Strain 2 Nucleotide Sequence*

1 ATIAAAGGTTTATACCTTCC CAGGTAAACAACCAACCAAC TTTCGATCTCTGTAGATCT GTTCTCTAAACGAACTTAA AATCTGTGGCTGTCACTC 100  
101 GCGTCGATGCTTAGTGCAC TACGACAGTATAATTAATAAC TAATACTGCTGCTTGACAGG ACACGAGTAACTCGTCTATC TTCTGCAGGCTGCTTACGGT 200  
201 TTCGTCGGTGTTGCAGCCGA TCATCAGCACATCTAGGTTT CGTCCGGGTGTGACCGAAAG GTAAGATGGAGAGCCTTGTG CCTGGTTTCAACGAGAAAAAC 300  
301 ACACGTCCAACCTAGTTTGC CTGTTTTACAGGTTTCGGAC GTGCTCGTACGTGGCTTTGG AGACTCCGTGGAGGAGTCT TATCAGAGGCACGTCAACAT 400  
401 CTTAAAGATGGCACTTGTGG CTTAGTAGAAGTTGAAAAAG GCGTTTTGCCTCAACTTGAA CAGCCCTATGTGTTTCATCA ACGTTCGGATGCTCGAACTG 500  
501 CACCTCATGGTCATGTTATG GTTGAGCTGGTAGCAGAACT CGAAGGCATTCACTACGGTC GTAGTGGTGAGACACTTGGT GTCCTTGCCCTCATGTGGG 600  
601 CGAAATACCAGTGGCTTACC GCAAGGTTCTTCTTCGTAAG AACGGTAATAAAGGAGCTGG TGGCCATAGTTACGGCGCCG ATCTAAAGTCATTTGACTTA 700  
701 GCGCAGCAGCTTGGCACTGA TCCTTATGAAGATTTTCAAG AAAACTGGAACACTAAACAT AGCAGTGGTGTACCCGTGA ACTCATGCGTGAGCTTAAAG 800  
801 GAGGGGCATACACTCGTAT GTCGATAACAACCTCTGTGG CCCTGATGGTACCCTCTTG AGTGATTAAAGACCTTCTA GCACGTGCTGGTAAAGCTTC 900  
901 ATGCACCTTTGTCGGAACAAC TGGACTTTATTGACACTAAG AGGGGTGTATCTGTGCCG TGAACATGAGCATGAAATTG CTTGGTACACGGAACGTTCT 1000  
1001 GAAAAGAGCTATGAATTGCA GACACCTTTTGAAATTAAT TGGCAAAGAAATTTGACACC TTCAATGGGAATGTCCAAA TTTTGTAATTCCTTAAAT 1100  
1101 CCATAATCAAGACTATTCAA CCAAGGGTTGAAAAGAAAAA GCTTGATGGCTTTATGGGTA GAATTCGATCTGTCTATCCA GTTGCCTACCAAATGAATG 1200  
1201 CAACCAAAATGTGCCTTICAA CTCTCATGAAGTGTGATCAT TGTGGTGAACCTTCATGGCA GACGGGCGATTTTGTTAAAG CCACTTGCGAATTTTGTGGC 1300  
1301 ACTGAGAATTTGACTAAAGA AGTGCCACTACTTGTGGTT ACTTACCCCAAAATGCTGTT GTTAAATTTATTGTCCAGC ATGTACAATTCAGAAGTAG 1400  
1401 GACCTGAGCATAGTCTTGCC GAATACCATAATGAATCTGG CTGAAAACCACTTCTCTGTA AGGGTGGTCGCACTATTGCC TTTGGAGGCTGTGTGTTCT 1500  
1501 TTATGTTGGTTGCCATAACA AGTGTGCCTATTGGGTCCA CGTGCTAGCGCTAACATAGG TTGTAACCATACAGGTGTTG TTGAGAAGGTTCCGAAGGT 1600  
1601 CTTAATGACAACTTCTTGA AATACTCCAAAAAGAGAAAG TCAACATCAATATGTGTGT GACTTTAAACTTAATGAAGA GATCGCCATTATTTTGGCAT 1700  
1701 CTTTTCTGTCTCCCAAGT GCTTTTGTGGAAACTGTGAA AGGTTTGGATTATAAAGCAT TCAACAAATTTTGAATCC TGTGGTAATTTTAAAGTTAC 1800  
1801 AAAAGGAAAAGCTAAAAAG GTGCTCGAATATTTGTGAA CAGAAATCAATACTGAGTCC TCTTATGCATTGTGCATCAG AGGCTGCTCGTGTGTACGA 1900  
1901 TCAATTTTCTCCCGCACTCT TGAACCTGCTCAAAATCTG TGCGTGTTTACAGAAGGCC GCTATAACAATACTAGATGG AATTCACAGTATCACTGA 2000  
2001 GACTCATTGATGCTATGATG TTCACATCTGATTGGGTAC TAACAATCTAGTTGTAATGG CCTACATTACAGGTGGTGT GTTCAGTTGACTTCGCAGTG 2100  
2101 GCTAACTAACATCTTTGGCA CTGTTTATGAAAACTCAAA CCCGCTCTGATTGGCTTGA AGAGAAGTTTAAGGAAGGTG TAGAGTTCTTAGAGACGGT 2200  
2201 TGGGAAATGTTAAATTTAT CTCAACCTGTGCTTGTGAAA TTGTCGGTGGCAAAATTGTC ACCTGTGCAAAGGAAATTAA GGAGAGTGTTACAGACTTCT 2300  
2301 TTAAGCTTGTAATAAATTT TTGGCTTGTGTGCTGACTC TATCATATTGGTGGAGCTA AACTTAAAGCCTTGAATTIA GGTGAAACATTGTACGCA 2400  
2401 CTCAAAGGGATTGTACAGAA AGTGTGTAAATCCAGAGAA GAAACTGGCCTACTCATGCC TCTAAAAGCCCCAAAAGAAA TTATCTTCTTAGAGGGAGAA 2500  
2501 ACACTTCCCACAGAAGTGTT AACAGAGGAAGTGTCTTGA AAAGTGGTGATTTACAACCA TTAGAACAACCTACTAGTGA AGCTGTTGAAGCTCCAATTG 2600  
2601 TTGTACACCAAGTTTGTATT AACGGGCTTATGTGCTCGA AATCAAAGACACAGAAAAGT ACTGTGCCCTTGCACCTAAT ATGATGGTAACAAACAATAC 2700  
2701 CTTACACTCAAAGCGGTG CACCAACAAAGGTACTTTT GGTGATGACACTGTGATAGA AGTGCAAGGTACAAGAGTG TGAATATCACTTTTGAACCT 2800  
2801 GATGAAAGGATTGATAAAGT ACTTAATGAGAAGTGCTCTG CCTATACAGTTGAACCTGGT ACAGAAGTAAATGAGTTCGG CTGTGTTGTGGCAGATGCTG 2900  
2901 TCATAAAACCTTGCAACCA GTAICTGAATTACTTACACC ACTGGGCATTGATTAGATG AGTGGAGTATGGCTACATAC TACTTATTGTAGAGTCTGG 3000  
3001 TGAGTTTAAATTTGGCTTAC ATATGTATTGTCTTCTAC CCTCCAGATGAGGATGAAGA AGAAGGTGATTGTGAAGAAG AAGAGTTTGAGCCATCAACT 3100  
3101 CAATATGAGTATGGTACTGA AGATGATTACCAAGGTAAC CTTTGAATTTGGTGGCACT TCTGTGCTCTTCAACCTGA AGAAGAGCAAGAAGAAGATT 3200  
3201 GGTGTAGATGATAGTACAA CAAACTGTTGGTCAACAAGA CGGCAGTGAGGACAATCAGA CAACTACTATTCAACAATT GTTGAGGTTCAACCTCAATT 3300  
3301 AGAGATGGAAGTTACACCAG TTGTTACAGATAITGAAGTG AATAGTTTATGAGTTATT AAAACTTACTGACAATGTAT ACATTAATAATGCAGACATT 3400  
3401 GTGGAAGAAGCTAAAAAGGT AAAACCAACAGTGGTTGTTA ATGCAGCCAATGTTTACCTT AAACATGGAGGAGGTGTGC AGGAGCCTTAAATAAGGCTA 3500  
3501 CTAACAATGCCATGCAAGTT GAATCTGATGATTACATAGC TACTAATGGACCACCTAAAG TGGGTGGTAGTTGTGTTTIA AGCGGACACAATCTTGCTAA 3600  
3601 ACACTGTCTTCATGTTGTCG GCCCAATGTTAACAAGGT GAAGACATCAACTTCTTAA GAGTGCTTATGAAAATTTIA ATCAGCACGAAGTTCTACTT 3700  
3701 GCACCATTAATTACAGCTGG TATTTTGGTGTGACCTTA TACATTCTTAAAGAGTTGT GTAGATACTGTTCCGACAAA TGTCTACTAGCTGTCTTTG 3800  
3801 ATAAAAATCTCTATGACAAA CTTGTTTCAAGCTTTTGGGA AATGAAGAGTGAAAAGCAAG TTGAACAAAAGATCGCTGAG ATTCTTAAAGAGGAAGTTAA 3900  
3901 GCCATTATAACTGAAAGTA AACCTTCAGTTGAACAGAGA AAACAAGATGATAAGAAAAT CAAAGCTTGTGTTGAAGAAG TTACAACAACCTCGGAAGAA 4000  
4001 ACTAAGTTCCTACAGAAAA CTTGTTACTTTATATTGACA TTAATGGCAATCTTCATCCA GATTCTGCCACTCTGTTAG TGACATTGACATCACTTCT 4100  
4101 TAAAGAAAGATGCTCCATAT ATAGTGGGTGATGTGTGTTA AGAGGGTGTTTAACTGCTG TGGTTATACCTACTAAAAAG GCTGTGGCACTACTGAAAT 4200  
4201 GCTAGCGAAAGCTTTGAGAA AAGTGCCAACAGACAATTAT ATAACCCTTACCCGGGTCA GGGTTTAAATGGTTACACTG TAGAGGAGGCTAAGACAGTG 4300  
4301 CTTAAAAAGTGTAAGATGTC CTTTACATTCTACCATCTA TTATCTCTAATGAGAAGCAA GAAATCTTGGAAGCTGTTT TGGAAATTTGCGAGAAATGC 4400  
4401 TTGCACATGCAGAAGAAACA CGCAAATATAGCCTGTCTG TGTGGAACTAAAGCCATAG TTTCAACTATACAGCGTAAA TATAAGGGTATTAATAATCA 4500  
4501 AGAGGGTGTGGTTGATTATG GTGCTAGATTTTACTTTTAC ACCAGTAAACAACCTGTAGC GTCATTATCAACACACTTA ACGATCTAAATGAACTCTT 4600  
4601 GTTACAATGCCACTTGGCTA TGTAACACATGGCTTAAATT TGGAAAGAAGTGCTCGGTAT ATGAGATCTCTCAAAGTGCC AGCTACAGTTTCTGTTTCT 4700  
4701 CACCTGATGCTGTACAGCG TATAATGGTTATCTTACTTC TTCTCTAAAAACCTGAAG AACATTTTATTGAAACCATC TCACTTGCTGGTTCCTATAA 4800  
4801 AGATTGGTCTTATCTGAC AATCTACACAACCTAGGTATA GAATTTCTTAAAGAGAGGTGA TAAAAGTGATATTACTACTA GTAATCCTACCACATTCCAC 4900  
4901 CTAGATGGTGAAGTTATCAC CTTTGACAATCTTAAAGACAC TCTTTCTTTGAGAGAAGTG AGGACTATTAAAGTGTTTAC AACAGTAGACAACATTAAAC 5000  
5001 TCCACACGCAAGTTGTGGAC ATGTCAATGACATATGGACA ACAGTTTGGTCCAACCTATT TGGATGGAGCTGATGTACT AAAATAAACCTCATAATTC 5100

5101 ACATGAAGGTAAACATTTT ATGTTTACCTAATGATGAC ACTCTACGTGTTGAGGCTTT TGAGTACTACCACAACTG ATCCTAGTTTTCTGGGTAGG 5200

5201 TACATGTCAGCATTAAATCA CACTAAAAAGTGGAAATACC CACAAGTTAATGGTTAACT TCTATTAAATGGGCAGATAA CAACTGTTATCTTGCCACTG 5300

5301 CATTGTTAACACTCCAAACA ATAGAGTTGAAGTTAATCC ACCTGCTCTACAAGATGCTT ATTACAGAGCAAGGGCTGGT GAAGCTGCTAAGTTTGTGC 5400

5401 ACTTATCTTACCTACTGTA ATAAGACAGTAGGTGAGTTA GGTGATGTTAGAGAAACAAT GAGTTACTTGTTCAACATG CCAATTTAGATTCTTGCAA 5500

5501 AGAGTCTTGAACGTGGTGTG TAAAACTTGTGGACAACAGC AGACAACCCTTAAGGGTGTA GAAGCTGTTATGTACATGGG CACACTTCTIATGAACAAT 5600

5601 TTAAGAAAGGTGTTGAGATA CCTGTACGTGTGGTAAACA AGCTACAAAATACTAGTAC AACAGGAGTCACCTTTTGTT ATGATGTCAGCACCACTGC 5700

5701 TCAGTATGAACTTAAGCATG GTACATTTACTTGTGCTAGT GAGTACACTGGTAATTACCA GTGTGGTCACTATAAACATA TAACCTCTAAAGAACTTTG 5800

5801 TATTGCATAGACGGTGCTTT ACTTACAAAGTCCTCAGAAT ACAAAGGTCTATTACGGAT GTTTCTACAAAGAAAACAG TTACACAACAACCATAAAAC 5900

5901 CAGTTACTTATAAATGGAT GGTGTTGTTGTACAGAAAT TGACCCTAAGTTGGACAATT ATTATAAGAAAGACAATTCT TATTTACAGAGCAACCAAT 6000

6001 TGATCTTGTACCAAAACCAAC CATATCCAACCGCAAGCTTC GATAATTTAAGTTTGATG TGATAATATCAAATTTGCTG ATGATTAAACAGTTAACT 6100

6101 GGTTATAAGAAACCTGCTTC AAGAGAGCTTAAAGTTACAT TTTTCCCTGACTTAAATGGA AGACCGCTTGGCTCCGACT TAAACACTACACACCTCTT 6200

6201 TTAAGAAAGGAGCTAAATTG TTACATAAACCTATTGTTTG GCATGTTAACAATGCAACTA ATAAAGCCACGTATAACCA AATACCTGGTGTATACGTTG 6300

6301 TCTTTGGAGCACAAAACCAAG TTGAACATCAAATTCGTTT GATGTACTGAAGTCAGAGGA CGCGCAGGGAATGGATAATC TTGCCTGCGAAGATCTAAA 6400

6401 CCAGTCTCTGAAGAAGTAGT GGAAAACTCTACCATACAGA AAGACGTTCTTGAGTGTAAT GTGAAAACCTACCGAAGTTGT AGGAGACATTATACTTAAAC 6500

6501 CAGCAAATAATAGTTTAAAA ATTACAGAAGAGGTGGCCA CACAGATCTAATGGCTGCTT ATGTAGACAATTCTAGTCTT ACTATTAAGAAACCTAATGA 6600

6601 ATTATCTAGAGTATTAGGTT TGAAAACCTTGCTACTCAT GGTTTAGCTGCTGTIAATAG TGTCCCTGGGATACTATAG CTAATTATGCTAAGCCTTT 6700

6701 CTTAACAAGTTGTIAGTAC AACTACTAACATAGTTACAC GGTGTTTAAACCGTGTTGT ACTAATTATATGCCTTATT CTTIACTTTATGTACAAT 6800

6801 TGTGTACTTTTACTAGAAGT ACAAATCTAGAATTAAAGC ATCTATGCCGACTACTATAG CAAAGAATACTGTAAAGAGT CTCGCTAAATTTGTCTAGA 6900

6901 GGCTTCATTTAATTATTGA AGTCACCTAATTTTCTAAA CTGATAAATATTATAATTG GTTTTACTATTAAAGTGTTC GCCTAGGTTCCTTAATCTAC 7000

7001 TCAACCGCTGCTTTAGGTGT TTAATGTCTAATTTAGGCA TGCCTTCTACTGTACTGGT TACAGAGAAGGCTATTIGAA CTCTACTAATGTCACTATTG 7100

7101 CAACCTACTGTACTGGTTCT ATACCTGTAGTGTTGTCT TAGTGGTTTAGATTCTTTAG ACACCTATCCTCTTTAGAA ACTATACAAATTACCATTTC 7200

7201 ATCTTTTAAATGGGATTAA CTGCTTTTGCGTTAGTGCA GAGTGGTTTTTGGCATAAT TCTTTCACTAGGTTTTTCT ATGTACTTGGATTGGCTGCA 7300

7301 ATCAAGCAATTGTTTTTCAG CTATTTTGCAGTACATTTTA TTAGTAATCTTGGCTTATG TGGTTAATAATTAATCTGT ACAAATGGCCCCGATTTCAG 7400

7401 CTATGGTTAGAATGTACATC TTCTTTGCATCATTTTATTA TGTATGGAAAAGTTATGTGC ATGTTGTAGACGGTTGTAAT TCATCAACTTGTATGATGTG 7500

7501 TTACAAACGTAATAGAGCAA CAAGAGTCGAATGTACAAC TATTGTTAATGGTGTAGAAG GTCCCTTTTATGTCTATGCTA ATGGAGGTAAAGGCTTTTGC 7600

7601 AAACACACAATTGGAATTG TGTTAATTGTGATACATTCT GTGCTGGTAGTACATTATT AGTGATGAAGTTGCGAGAGA CTGTCACTACAGTTTAAAA 7700

7701 GACCAATAAATCTACTGAC CAGTCTTCTTACATCGTTGA TAGTGTTACAGTGAAGAATG GTTCCATCCATCTTACTTT GATAAAGCTGGTCAAAAGAC 7800

7801 TTATGAAAGACATTCTCTCT CTCATTTTGTTAACTTAGAC AACCTGAGAGCTAATAACAC TAAAGGTTCAATGCTTATTA ATGTIATAGTTTTTGATGGT 7900

7901 AAATCAAAATGTGAAGAATC ATCTGCAAAATCAGCGTCTG TTIACTACAGTCAGCTTATG TGTCAACCTACTGTTACT AGATCAGGCATTAGTGCTG 8000

8001 ATGTTGGTGATAGTGGGAA GTTGCGAGTTAAATGTTTGA TGCTTACGTTAATACGTTTT CATCAACTTTTAAAGTACCA ATGGAAAAACTAAAACACT 8100

8101 AGTTGCAACTGCAGAAGCTG AACTTGCAAAGAATGTGCC TTAGACAATGCTTATCTAC TTTTATTTAGCAGCTCGGC AAGGGTTTGTGATTCAGAT 8200

8201 GTAGAAACTAAAGATGTTGT TGAATGTCTTAAATGTAC ATCAATCTGACATAGAAGTT ACTGGCGATAGTTGTAATA CTATATGCTCACCTATAACA 8300

8301 AAGTTGAAAACATGACACCC CGTGACCTTGGTGCTTGAT TGACTGTAGTGCGGTCATA TTAATGCGCAGGTAGCAAAA AGTCACAACATTGCTTTGAT 8400

8401 ATGGAACGTTAAAGATTTC TGTCAATTGCTGAACAAC TAAGAAAACAATACGTAGTGC TGCTAAAAAGAATAACTTAC CTTTAAAGTTGACATGTGCA 8500

8501 ACTACTAGACAAGTTGTAA TGTGTAAACAACAAGATAG CACTTAAGGGTGGTAAAT GTTAATAATTGGTTGAAGCA GTTAATTAAGTTACACTTG 8600

8601 TGTTCCTTTTTGTGCTGCT ATTTTCTATTTAATAACACC TGTTCATGTCATGTCTAAAC ATACTGACTTTTCAAGTGAA ATCATAGGATACAAGGCTAT 8700

8701 TGATGGTGGTGTCACCTGTG ACATAGCATCTACAGATACT TGTTTGTCTAACAACATGC TGATTTTGACACATGGTTA GCCAGCGTGGTGGTAGTTAT 8800

8801 ACTAATGACAAAGCTTGCCC ATTGATTGCTGCAGTCATAA CAAGAGAAGTGGGTTTTGTC GTGCTGGTTTGCTGGCAC GATATTACGCACAACATAATG 8900

8901 GTGACTTTTTCGATTICTTA CTAGAGTTTTTATGTGAGT TGGTAACATCTGTTACACAC CATCAAACTTATAGAGTAC ACTGACTTTGCAACATCAGC 9000

9001 TTGTGTTTTGGCTGCTGAAT GTACAATTTTAAAGATGCT TCTGTAAGCCAGTACCATA TTGTIATGATACCAATGTAC TAGAAGGTTCTGTGCTTAT 9100

9101 GAAAGTTTACGCCCTGACAC ACGTTATGTGCTCATGGATG GCTCTATTATICAATTTCTT AACACCTACCTTGAGGGTTC TGTAGAGTGGTAACAACTT 9200

9201 TTGATTCTGAGTACTGTAGG CACGGCACTTGTGAAAGATC AGAAGCTGGTGTTTGTGTAT CTACTAGTGGTAGATGGGTA CTTAACAATGATTATTACAG 9300

9301 ATCTTTACCAGGAGTTTTCT GTGGTGTAGATGCTGTAAT TTACTTACTAATATGTTTAC ACCACTAATCAACCTATTG GTGCTTTGGACATATCAGCA 9400

9401 TCTATAGTAGCTGGTGTAT TGTAGCTATCGTAGTAACAT GCCTTGCTACTATTTTATG AGGTTTGAAGAGCTTTTGG TGAATACAGTCATGTAGTTG 9500

9501 CCTTAAACTTTTACTATTCT CTTATGTCAATCACTGACT CTGTTTAAACACCAAGTTTACT CATTCTTACCTGGTGTTAT TCTGTTATTACTTGTACTT 9600

9601 GACATTTTATCTACTAATG ATGTTTCTTTTTTAGCACAT ATTCAGTGGATGTTATGTT CACACCTTAGTACCTTTCT GGATAACAATTGCTTATATC 9700

9701 ATTTGTATTTCACAAAGCA TTTCTATTGGTTCCTTAGTA ATTACCTAAAGAGACGTGTA GTCTTTAATGGTGTTCCTT TAGTACTTTTGAAGAAGCTG 9800

9801 CGCTGTGCACCTTTTTGTTA AATAAAGAAATGTATCTAAA GTTGCGTAGTGTGTGCTAT TACCTCTTACGCAATATAAT AGATACTAGCTCTTATATA 9900

9901 TAAGTACAAGTATTTTAGTG GAGCAATGGATACAACATAGC TACAGAGAAGCTGCTGTTG TCATCTCGCAAAGGCTCTCA ATGACTTCAGTAACTCAGGT 10000

10001 TCTGATGTTCTTACCAACC ACCACAAACCTCTATCACCT CAGCTGTTTTGCGAGAGTGGT TTAGAAAAATGGCATTCCTC ATCTGGTAAAGTTGAGGGTT 10100

10101 GTATGGTACAAGTAACTTGT GGTACAACACTACTTAACGG TCTTGGCTGTATGACGTAG TTTACTGTCCAAGACATGTG ATCTGCACCTCTGAAGACAT 10200

10201 GCTTAAACCTCAATTATGAAG ATTTACTCATTCGTAAGTCT AATCATAATTCTTGGTACA GGCTGGTAATGTTCAACTCA GGGTTATTGGACATTCTATG 10300

10301 CAAAATGTGTACTTAAAGCT TAAGGTTGATACAGCCAATC CTAAGACACCTAAGTATAAG TTGTTCGCAATCAACCAGG ACAGACTTTTTTCAAGTTAG 10400

10401 CTTGTTACAATGGTTCACCA TCTGGTGTTTACCAATGTGC TATGAGGCCCAATTCACTA TTAAGGGTTCATTCCTTAAT GGTTCAATGTTAGTGTGG 10500

10501 TTTTAACATAGATTACT GTGTCTCTTTTGTACATG CACCATATGGAATTACCAAC TGGAGTTCATGCTGGCACAG ACTTAGAAGGTAAC TTTTAT 10600

10601 GGACCTTTTGTGACAGGCA AACAGCACAAAGCAGCTGGTA CGGACACAAC TATTACAGTT AATGTTTTAGCTTGGTGTGA CGCTGCTGTATAAATGGAG 10700

10701 ACAGGTGGTTTCTCAATCGA TTACCCACAAC TCTTAATGA CTTTAACCTTGTGGCTATGA AGTACAATTATGAACCTCTA ACACAAGACCATGTTGACAT 10800

10801 ACTAGGACCTCTTTCTGCTC AAATGGAATTGCCGTTTTA GATATGTGTGCTTCATTAAA AGAATTACTGCAA AATGGTA TGAATGGACGTACCATATTG 10900

10901 GGTAGTGCCTTAATTAGAAGA TGAATTTACACCTTTTGATG TTGTAGACAATGCTCAGGT GTTACTTTCCAAAGTGCAGT GAAAAGAACAAATCAAGGGTA 11000

11001 CACACCACTGGTTGTACTC ACAATTTGACTTCAC TTTT AGTTTTAGTCCAGAGTACTC AATGGTCTTTGTCTTTTTT TIGTATGAAAATGCC TTTT 11100

11101 ACCTTTTGCTATGGGTATTA TTGCTATGTCGCTTTTGCA ATGATGTTTGTCAAACATAA GCATGCATTCTCTGTTGT TTTTGTACCTTCTCTTGCC 11200

11201 ACTGTAGCTTA TTTTAATAT GGTCTATATGCCTGCTAGT GGTGTATGCCGTAATTATGACA TGGTGGATATGGTTGATAC TAGTTTGTCTGGTTTAAAGC 11300

11301 TAAAAGACTGTGTTATGTAT GCATCAGCTGTAGTGTACT AATCCTTATGACAGCAAGAA CTGTGTATGATGATGCTGCT AGGAGAGTGTGGACACTTAT 11400

11401 GAATGCTTGGACACTCGTTT ATAAAGTTTATTATGTAAT GCTTTAGATCAAGCCATTTC CATGTGGGCTCTTATAATCT CTGTTACTTCTAACTACTCA 11500

11501 GGTGTAGTTACAAC TGCAT GTTTTGGCCAGAGGTATG TTTTATGTGTGTGAGTAT TGCCCTATTTCTTCATAAC TGGTAATACACTTCAGTGTA 11600

11601 TAATGCTAGTTTATGTGTTT TTAGGCTATTTTGTACTTG TIACCTTGGCCTCTTTGTT TACTCAACCGCTACTTIAGA CTGACTCTTGGTGTTTATGA 11700

11701 TTACTTAGTTTCTACACAGG AGTTTAGATATATGAATCA CAGGACTACTCCCAACCAA GAATAGCATAGATGCCTCA AACTCAACATTAAATTGTTG 11800

11801 GGTGTGGTGGCAACCTTG TATCAAAGTAGCCACTGTAC AGTCTAAATGTGAGATGTA AAGTGCACATCAGTAGTCTT ACTCTCAGTTTTGCAACAAC 11900

11901 TCAGAGTAGAATCATCATCT AAATTGTGGGCTCAATGTG CCAAGTTACACAATGACATTC TCTTAGCTAAAGATACTACT GAAGCCTTTGAAAAAATGGT 12000

12001 TTCACTACTTCTGTTTTC TTCCATGCAAGGTGCTGTA GACATAAAACAAGCTTTGTGA AGAAATGTGCGACAACAGGG CAACCTTACAAGCTATAGCC 12100

12101 TCAGAGTTAGTTCCTCTCC ATCATATGCAGCTTTTGCTA CTGCTCAAGAAGCTTATGAG CAGGCTGTGCTAATGGTGA TTCTGAAGTTGTTCTTAAAA 12200

12201 AGTTGAAGAAGTCTTGAAT GTGGCTAAATCTGAATTGA CCGTGATGCAAGCCATGCAAC GTAAGTTGGAAGATGGCT GATCAAGCTATGACCCAAAT 12300

12301 GTATAAACAGGCTAGACTCG AGGACAAGAGGGCAAAAGTT ACTAGTGCTATGCAGACAAT GCTTTTCACTATGCTTAGAA AGTTGGATAATGATGCACTC 12400

12401 AACAACATTATCAACAATGC AAGAGATGGTTGTGTCCCT TGAACATAATACCTCTTACA ACAGCAGCCAACTAATGGT TGTATACCAGACTATAACA 12500

12501 CATATAAAATACGTGTGAT GGTACAACATTACTTATGTC ATCAGCAATTGTGGGAAATCC AACAGGTGTAGATGCAGAT AGTAAAAATTGTCAACTTAG 12600

12601 TGAATTAGTATGGACAATT CACCTAATTAGCATGGCCT CTTATTGTAACAGCTTAAAG GGCCAATTCTGTGTCAAAT TACAGAATAATGAGCTTAGT 12700

12701 CCTGTGCACTACGACAGAT GTCTGTGTGCTGCCGTACTA CACAAACTGCTGCACTGAT GACAATGCGTTAGCTTACTA CAACACAACAAAGGGAGGTA 12800

12801 GGTTTGTACTTGCACTGTTA TCCGATTTACAGGATTTGAA ATGGGTAGATTCCTAAGA GTGATGGAAGTGTACTATC TATACAGAACTGGAACCACT 12900

12901 TTGTAGGTTTGTACAGACA CACCTAAAGTCTCTAAAGTG AAGTATTATATCTTTATTA AGGATTAAACAACCTAAATA GAGGTATGGTACTTGGTAGT 13000

13001 TTAGCTGCCACAGTACGTCT ACAAGCTGGTAATGCAACAG AAGTGCCTGCCAATTCAACT GTATTATCTTTCTGTGCTTT TGCTGTAGATGCTGCTAAAG 13100

13101 CTTACAAGATTATCTAGCT AGTGGGGGACAACCAATCAC TAATTGTGTTAAGATGTTGT GTACACACACTGGTACTGGT CAGGCAATAACAGTTACACC 13200

13201 GGAAGCCAATATGGATCAAG AATCCTTTGGTGGTGCATCG TGTGTCTGTACTGCCGTTG CCACATAGATCATCCAAATC CTAAAGGATTTGTGACTTA 13300

13301 AAAGGTAAGTATGTACAAAT ACCTACAAC TGTGCTAATG ACCCTGTGGGTTTACACTT AAAAAACAGCTCTGTACCGT CTGCGGTATGTTGAAAGGTT 13400

13401 ATGGCTGTAGTTGTGATCAA TCCTCGGAACCCATGCTTCA GTCAGCTGATGCACAACGTT TTTTAAACGGGTTTGGCGTG TAAGTGCAGCCGCTTTACA 13500

13501 CCGTCCGGCACAGGCACTAG TACTGATGTCGTATACAGGG CTTTGTGACATCTACAATGAT AAAGTAGCTGGTTTGTCTAA ATTCTAAAAACTAATTGTT 13600

13601 GTCGCTTCCAAGAAAAGGAC GAAGATGACAATTTAATGA TTCTTACTTTGTAGTTAAGA GACACACTTTCTCTAACTAC CAACATGAAGAAACAATTA 13700

13701 TAATTACTTAAAGGATTGTC CAGCTGTGCTTAAACATGAC TTCTTTAAGTTTAGAATAGA CCGTGACATGGTACCACATA TATCACGTCAACGCTTACT 13800

13801 AAATACACAATGGCAGACCT CGTCTATGCTTTAAGGCAAT TTGATGAAGTGAATTTGAC ACATTAAGAAATACTTGT CACATACAATTGTTGTGATG 13900

13901 ATGATTATTCAATAAAAAAG GACTGGTATGATTTTGTAGA AAACCCAGAAGTCGGATCGT AATACGCCAACTTAGGTGAA CGTGACGCCAAGCTTTGTT 14000

14001 AAAAAACAGTACAATTCTGTG ATGCCATGCGAAATGCTGGT ATTGTGGTGTACTGACATT AGATAATCAAGATCTCAATG GTAAGTGGTATGATTTCGGT 14100

14101 GATTTCATACAACACAGGCC AGGTAGTGGAGTTCCTGTTG TAGATTCTTATATTATTG TTAAATGCCTATATTAACCTT GACCAGGGCTTAACTGCAG 14200

14201 AGTCACATGTTGACACTGAC TTAACAAAGCCTTACATTA GGTGGGATTTGTTAAATATG ACTTCACGGAAGAGAGGTTA AAACCTTTGACCGTTATTT 14300

14301 TAAATATTGGGATCAGACAT ACCACCCAAATTTGTGTTAA TGTGTGGATGACAGATGCAT TCTGCATTGTGCAAACCTTA ATGTTTTATTCTCTACAGTG 14400

14401 TTCCCACTTACAAGTTTGG ACCACTAGTGAGAAAAATAT TTGTGATGGTGTTCATT TTAGTTTCAACTGGATACCA CTTAGAGAGCTAGGTGTG 14500

14501 TACATAATCAGGATGTAAC TTACATAGCTTAGACTTAG TTTTAAGGAATTACTTGTGT ATGCTGCTGACCCGTCTATG CACGCTGCTTCTGTAATCT 14600

14601 ATTACTAGATAAACGCACTA CGTGCTTTTCTAGTAGCTGCA CTTACTACAATGTTGCTTT TCAAACCTGTCAAACCCGGTA ATTTTAAACAAGACTTCTAT 14700

14701 GACTTGTCTGTCTAAGGG TTCTTTAAGGAAGGAAGTT CTGTTGAATTAACACCTTC TTCTTTGCTCAGGATGGTAA TGCTGCTATCAGCGATTATG 14800

14801 ACTACTATCGTTATAATCTA CCAACAATGTGTGATATCAG ACAACTACTATTGTAGTTG AAGTTGTTGATAAGTACTTT GATTGTTACGATGGTGGCTG 14900

14901 TATTAATGCTAACCAAGTCA TCGTCAACAACCTAGACAAA TCAGCTGGTTTTCATTAA TAAATGGGGTAAGGCTAGAC TTTATTATGATTCAATGAGT 15000

15001 TATGAGGATCAAGATGCACT TTTGCTATATACAAAACGTA ATGTCATCCCTACTATAACT CAAATGAATCTTAAAGTATG CATTAGTGCAAAGAATAGAG 15100

15101 CTCGACCGTAGCTGGTGTC TCTATCTGTAGTACTATGAC CAATGACAGTTTCATCAAA AATTATTGAAATCAATAGCC GCCACTAGAGGAGCTACTGT 15200

15201 AGTAATTGGAACAAGCAAAAT TCTATGGTGGTTGGCACAAC ATGTAAAAACTGTTATAG TGATGTAGAAAACCCCTACC TTATGGGTGGGATTATCCT 15300

15301 AAATGTGATAGACCATGCC TAACATGCTTAGAATTATGG CCTCACTGTCTGTGCTCGC AAACATACAACGTGTTGAG CTGTACACCGTTTCTATA 15400

15401 GATTAGCTAATGAGTGTCT CAAGTATTGAGTGAATGGT CATGTGTGGCGGTTCACTAT ATGTTAAACCAAGTGGAACC TCATCAGGAGATGCCACAAC 15500

15501 TGCTTATGCTAATAGTGTTT TTAACAATTGTCAAGCTGTC ACGGCAATGTTAATGCACT TTTATCTACTGATGTTAACA AAATGGCGGATAAGTATGTC 15600

15601 CGCAATTTACAACACAGACT TTATGAGTGTCTCTATAGAA ATAGAGATGTTGACACAGAC TTTGTGAATGAGTTTACGC ATATTGCGTAAACAATTCT 15700

15701 CAATGATGACTCTCTGAC GATGCTGTTGTGTGTTTCAA TAGCACTTATGCATCTCAAG GTCTAGTGGCTAGCATAAAG AACTTTAAGTCAGTTCTTA 15800

15801 TTATCAAAACAATGTTTTTA TGTCTGAAGCAAAATGTTGG ACTGAGACTGACCTTACTAA AGGACCTCATGAATTTGCT CACAACATACAATGCTAGTT 15900

15901 AACAGGGTGATGATTATGT GTACCTTCCTTACCCAGATC CATCAAGAATCCTAGGGGCC GGCTGTTTTGTAGATGATAT CGTAAAAACAGATGGTACAC 16000

16001 TTATGATTGAACGGTTCGTG TCTTTAGCTATAGATGCTTA CCCACTTACTAAACATCCTA ATCAGGAGTATGCTGATGTC TTTCATTGTACTTACAATA 16100

16101 CATAAGAAAGCTACATGATG AGTTAACAGGACACATGTTA GACATGTAITCTGTATGCT TACTAATGATAACACTTCAA GGTATTGGGAACCTGAGTTT 16200

16201 TATGAGGCTATGTACACACC GCATACAGTCTTACAGGCTG TTGGGGCTTGTGTTCTTTGC AATTCACAGACTTCATTAAG ATGTGGTGCTTGCATACGTA 16300

16301 GACCATTCTTATGTGTGAAA TGCTGTIACGACCATGTCAT ATCAACATCACATAAAATTAG TCTTGTCTGTAAATCCGTAT GTTTGCAATGCTCCAGGTG 16400

16401 TGATGTCACAGATGTGACTC AACTTTACTTAGGAGGTATG AGCTATTATTGTAAATCACA TAAACCACAAGTCGGTTTTC CAITGTGTGCTAATGGACAA 16500

16501 GTTTTTGGTTTATATAAAAA TACATGTGTGGTAGCGATA ATGTTACTGACTTTAATGCA ATTGCAACATGTGACTGGAC AAATGCTGGTGATTACATTT 16600

16601 TAGCTAACACCTGTACTGAA AGACTCAAGCTTTTTCGAGC AGAAACGCTCAAAGCTACTG AGGAGACATTTAAACTGTCT TATGGTATGCTACTGTACG 16700

16701 TGAAGTGCTGCTGACAGAG AATTACATCTTTCATGGGAA GTTGGTAAACCTAGACCACC ACTTAACCGAAATATGTCT TTACTGGTTATCGTAACT 16800

16801 AAAAAACAGTAAAGTACAAAT AGGAGAGTACACCTTTGAAA AAGGTGACTATGGTATGCT GTTGTTTACCGAGGTACAAC AACTTACAAATTAATGTTG 16900

16901 GTGATTATTTTGTGCTGACA TCACATACAGTAATGCCATT AAGTGCACCTACACTAGTGC CACAAGAGCACTATGTTAGA ATTACTGGCTTATACCCAAC 17000

17001 ACTCAATATCTCAGATGAGT TTTCTAGCAATGTGCAAAAT TATCAAAAGGTGGTATGCA AAGTATTCTACACTCCAGG GACCACCTGGTACTGGTAAG 17100

17101 AGTCATTTTGTCTATTGGCCT AGCTCTCTACTACCTTCTG CTCGCATAGTGTATACAGT TGCTCTCATGCCGCTGTTGA TGCATATGTGAGAAGGCAT 17200

17201 TAAAAATATTGGCTATAGAT AAATGTAGTAGAATTATACC TGCACGTGCTCGTGTAGAGT GTTTTGATAAAATCAAAGTG AATTCAACATTAGAACAGTA 17300

17301 TGTCTTTTGTACTGTAAATG CATTGCGCTGAGACGACAGCA GATATAGTTGTCTTTGATGA AATTTCAATGCCCGCAAATT ATGATTGAGTGTGTCAAT 17400

17401 GCCAGATTACGTGCTAAGCA CTATGTGTACATTGGCGACC CTGCTCAATTACCTGCACCA CGCACATGTCTAACTAAGGG CACACTAGAACCAGAAATTT 17500

17501 TCAATTCAGTGTGTAGACTT ATGAAAACTATAGGTCCAGA CATGTTCCTCGGAACTTGTC GCGCTGTCTGCTGAAATT GTTGACACTGTGAGTGCCTTT 17600

17601 GGTTTATGATAATAAGCTTA AAGCACATAAAGACAAATCA GCTCAATGCTTTAAATGTT TTATAAGGGTGTATCACGC ATGATGTTTATCTGCAATT 17700

17701 AACAGGCCGCAATAGGCGGT GGTAAGAGAATTCCTTACAC GTAACCTGCTGTGGAGAAAA GCTGCTTTTATTCACCTTA TAATTCACAGAATGCTGTAG 17800

17801 CCTCAAAGATTTTGGGACTA CCAACTCAAACCTGTTGATTC ATCAGGGCTCAGAATATG ACTATGTCATATTCACTCAA ACCACCGAAACAGTCACTC 17900

17901 TTGTAATGTAAACAGATTTA ATGTTGCTATTACCAGAGCA AAAGTAGGCATACTTTCAT AATGCTGATAGAGACCTTT ATGACAAGTGCATTTACA 18000

18001 AGTCTTGAAATCCACGTAG GAATGTGGCAACTTTACAAG CTGAAAATGTAAACAGGACTC TTAAAGATTGTAGTAAGGT AATCACTGGTTACATCCTA 18100

18101 CACAGGCGCTACACACCTC AGTGTGACACTAAATTCAA AACTGAAGGTTTATGTGTG ACATACCTGGCATACTAAG GACATGACCTATAGAAGACT 18200

18201 CATCTCTATGATGGGTTTTA AAATGAATTATCAAGTTAAT GGTTACCTTAACATGTTTAT CACCCGCGAAGAAGCTATAA GACATGTACGTGCATGGATT 18300

18301 GGTCTCGATGTCGAGGGGTG TCATGCTACTAGAGAAGCTG TTGGTACCAATTACCTTTA CAGTAGGTTTTTCTACAGG TGTTAACCTAGTTGCTGTAC 18400

18401 CTACAGGTATGTTGATACA CCTAATAATACAGATTTTC CAGAGTTAGTGCTAAACCAC CGCTGGAGATCAATTTAAA CACCTCATACCACTTATGTA 18500

18501 CAAAGGACTTCCTTGAATG TAGTGCGTATAAAGATTGTA CAAATGTTAAGTGACACACT TAAAAATCTCTGACAGAG TCGTATTGTCTTATGGGCA 18600

18601 CATGGCTTTGAGTTGACATC TATGAAGTATTTTGTGAAAA TAGGACCTGAGCGACCTGT TGTCTATGTATAGACGTGC CACATGCTTTTCCACTGCTT 18700

18701 CAGACACTTATGCCTGTGG CATCATCTATTTGGATTGTA TTACGCTATAATCCGTTTA TGATTGATGTTCAACAATGG GGTTTTACAGTTAACCTACA 18800

18801 AAGCAACCATGATCTGTATT GTCAAGTCCATGGTAATGCA CATGTAGCTAGTTGTGATGC AATCATGACTAGGTGTCTAG CTGTCCACGAGTGTGTTGTT 18900

18901 AAGCGTGTGACTGGACTAT TGAATATCTATAATTGGTG ATGAACTGAAGATTAATGCG GCTGTAGAAAGGTTCACAA CATGGTTGTAAAGCTGCAT 19000

19001 TATTAGCAGACAAATCCCA GTTCTTCAGCAGATTTGGTAA CCTTAAAGCTATTAAGTGTG TACCTCAAGCTGATGTAGAA TGAAGTCTATGATGCACA 19100

19101 GCCTTGTAGTGACAAAGCTT ATAAAAATAGAAGAAATTATC TATCTTATAAGTCGGATCG TAGCCAATGTCGTTCTGTGTG TATGCTATTTTGAATTGC 19200

19201 AATGTCGATAGATATCTCG TAATTCATTGTTGTAGAT TTAGACACTAGATGCTATCT AACCTTAACTTGCCTGGTGTG TGATGGTGGCAGTTTGATG 19300

19301 TAAATAAACATGCATTCAC ACACCAGCTTTTGATAAAAG TGTCTTTGTAAATTTAAAC AATTACCATTTTCTATTAC TCTGACAGTCCATGTGAGTC 19400

19401 TCATGGAAAAACAAGTAGTGT CAGATATAGATTATGTACCA CTAAGTCTGCTACGTGTAT AACACGTGCAATTTAGGTG GTGCTGTCTGTAGACATCAT 19500

19501 GCTAATGAGTACAGATTGTA TCTCGATGCTTATAACATGA TGATCTCAGCTGGCTTAGC TTGTGGGTTTACAAACAATT TGATACTTATAACCTCTGGA 19600

19601 ACACTTTACAAGACTTCAG AGTTTAGAAAAATGTGGCTTT TAATGTTGTAATAAAGGAC ACTTGTATGGACAACAGGT GAAGTACCAGTTTCTATCAT 19700

19701 TAATAACACTGTTTACACAA AAGTTGATGGTGTGTATGTA GAATGTTTGTAAAAATAAAC AACATTACCTGTTAATGTAG CAITTGAGCTTTGGGCTAAG 19800

19801 CGCAACATTAAACAGTACC AGAGGTGAAAAATCTCAATA ATTGGGTGTGGACATTGCT GCTAATACTGTGATCTGGGA CTACAAAAGAGATGCCCCAG 19900

19901 CACATATATCTACTATTGGT GTTGTCTTATGACTGACAT AGCCAAGAAACCAACTGAAA CGATTGTGCACCACTCACT GTCTTTTTTIGATGGTAGAGT 20000

20001 TGATGGTCAAGTAGACTTAT TTAGAAATGCCGTAATGGT GTTCTTATTACAGAAGGTAG TGTAAAGGTTTACAACCAT CTGATGGTCCCAACAAGCT 20100

20101 AGTCTTAATGGAGTCACATT AATTGGAGAAGCCGTAAAAA CACAGTTCATTAATTATAAG AAAGTTGATGGTGTGTCCA ACAATTACCTGAAACTTACT 20200

20201 TTACTCAGAGTAGAAATTTA CAAGAATTTAAACCCAGGAG TCAAATGGAATTGATTCT TAGAATTAGCTATGGATGAA TTCATTGAACGGTATAAATT 20300

20301 AGAAGGCTATGCCCTCGAAC ATATCGTTTATGGAGATTTT AGTCATAGTCAGTTAGGTGG TTTACATCTACTGATTGGAC TAGCTAAACGTTTAAAGGAA 20400

20401 TCACCTTTTGAAATTAGAAGA TTTTATCTTATGGACAGTA CAGTTAAAACTATTTTATA ACAGATGCGCAACAGGTTT ATCTAAGTGTGTGTGTTCTG 20500

20501 TTATTGATTATTACTTGAT GATTTGTGTGAAATAATAAA ATCCCAAGATTATCTGTAG TTTCTAAGTTGTCAAAGTG ACTATTGACTATACAGAAAT 20600

20601 TTCATTATTGCTTTGGTGTA AAGATGGCCATGTAGAAACA TTTTACCAAAAATTACAATC TAGTCAAGCGTGGCAACCGG GTGTGCTATGCCTAATCTT 20700

20701 TACAAAATGCAAGAATGCT ATTAGAAAAGTGTGACCTTC AAAATTATGGTGATAGTGA ACATTACCTAAAGGCATAAT GATGAATGTCGCAAAATATA 20800

20801 CTCAACTGTGTCAATATTTA AACACATTAAACATTAGCTGT ACCCTATAATATGAGAGTTA TACATTTTGGTGCTGGTTCT GATAAAGGAGTTGCCACAGG 20900

20901 TACAGCTGTTTTAAGACAGT GGTTCCTACGGGTACGCTG CTGTGCGATCAGATCTTAA TGACTTTGTCTCTGATGCAG ATTCAACTTTGATTGGTGAT 21000

21001 TGTGCAACTGTACATACAGC TAATAAATGGGATCTCATT TTAGTGATATGTACGACCCT AAGACTAAAAATGTTACAAA AGAAAATGACTCTAAAGAGG 21100

21101 GTTTTTTCACTTACATTTGT GGGTTTATACACAAAAGCT AGCTCTTGGAGGTTCCGTGG CTATAAAGATAACAGAACAT TCTTGGAATGCTGATCTTTA 21200

21201 TAAGTCATGGGACACTTCG CATGGTGGACAGCCTTTGTT ACTAATGTGAATGCGTATC ATCTGAAGCAITTTTAATTG GATGTAATTATCTTGGCAAA 21300

---

21301 CCACGGAACAAATAGATGG TTATGTCATGCATGCAAATT ACATATTTGGAGGAATACA AATCCAATTCAGTTGCTTC CTATCTTTATTTGACATGA 21400

21401 GTAAATTTCCCTTAAATTA AGGGGTACTGCTGTATGTC TTTAAAGAAGGTCAAATCA ATGATATGATTTTATCTCTT CTAGACTTGGTAGACTTAT 21500

21501 AATTAGAGAAAACAACAGAG TTGTTATTTCTAGTGATGTT CTGTGTAACAACATAACGAA CAATGTTGTTTTCTTGTT TTAITGCCACTAGTCTCTAG 21600

21601 TCAGTGTGTTAATCTTACAA CCAGAACTCAATTACCAAG TCGGACACTAATCTTTTAC ACGTGGTGTATTATACCCTG ACAAAGTTTCAGATCCTCA 21700

21701 GTTTTACATCAACTCAGGA CTGTCTTTACCTTTCTTTT CCAATGTIACCTTGGTCCAT GCTATACATGCTCTGGGAC CAATGGTACTAAGAGGTTG 21800

21801 ATAACCTGTCTACCATTT AATGATGGTGTTTATTTTGC TTCCACTGAGAAGTCTAACA TAATAAGAGGCTGGATTTT GGTACTACTTTAGATTCGAA 21900

21901 GACCCAGTCCCTACTTATTG TTAATAACGCTACTAATGTT GTTATAAAGTCTGTGAATT TCAATTTGTAATGATCCAT TTTGGGTTTATTACCAC 22000

22001 AAAACAACAAAAGTTGGAT GGAAAGTGAGTTCAGAGTTT ATTCTAGTGCGAATAATTGC ACTTTGAATAIGTCTCTCA GCCTTTTCTTATGGACCTG 22100

22101 AAGGAAAACAGGGCAATTTT AAAATCTTAGGGAATTTGT GTTAAAGAAATGATGTTT ATTTTAAATATATTCTAAG CACACGCCTATTAATTTAGT 22200

22201 CGGTGATCTCCCTCAGGGT TTTGGCTTTAGAACCAATTG GTAGATTTGCCAATAGGTAT TAACATCACTAGGTTTCAAA CTTTACTTGCTTTACATAGA 22300

22301 AGTTATTTGACTCTCGTGA TTCTTCTCAGGTGGACAG CTGGTGTGCGAGCTTATTAT GTGGGTATCTTCAACCTAG GACTTTTCTATTAATAATA 22400

22401 ATGAAAATGGAACCATTACA GATGCTGTAGACTGTGCACT TGACCTCTCTCAGAAACAA AGTGACGTTGAAATCCTTC ACTGTAGAAAAAGGAATCTA 22500

22501 TCAAACTTTAACTTTAGAG TCCAACCAACAGAAATCTATT GTTAGATTTCCTAATATTAC AAATTTGTGCCCTTTGGTG AAGTTTTAACGCCACCAGA 22600

22601 TTTGCATCTGTTTATGCTTG GAACAGGAAGAGAATCAGCA ACTGTGTGCTGATTATTCT GTCCTATATAATCCGCATC ATTTTCCACTTTTAAGTGT 22700

22701 ATGGAGTGTCTCTACTAAA TTAATGATCTCTGCTTTAC TAATGTCTATGCAGATTAT TTGTAATTAGAGGTGATGAA GTCAGACAAATCGCTCCAGG 22800

22801 GCAAACCTGGAAGATTGCTG ATTATAATTATAAATTACCA GATGATTTTACAGGCTGCGT TATAGCTTGAATCTAACA ATCTTGATTCTAAGGTGGT 22900

22901 GGTAATTATAATTACCTGTA TAGATTGTTTAGGAAGTCTA ATCTCAAACCTTTTGAGAGA GATATTCAACTGAAATCTA TCAGGCCGGTAGACACCTT 23000

23001 GTAATGGTGTGAAGGTTTT AATTGTTACTTTTCTTTACA ATCATATGGTTTCCAACCCA CTAATGGTGTGGTTACCAA CCATACAGAGTAGTAGTACT 23100

23101 TTTCTTTGAACCTTCTACATG CACCAGCAACTGTTTGGA CCTAAAAAGTCTACTAATT GGTAAAAAACAATGTGTCA ATTTCAACTTCAATGGTTA 23200

23201 ACAGGCACAGGTGTTCTTAC TGAGTCTAACAAAAGTTTC TGCCTTTCCAACAATTTGGC AGAGACATGCTGACACTAT CGATGCTGTCCGTGATCCAC 23300

23301 AGACACTTGAGATTCTTGAC ATTACACCATGTTCTTTTGG TGTGTGCTAGTTATAACAC CAGGAACAAATACTTCTAAC CAGGTTGCTGTTCTTTATCA 23400

23401 GGATGTTAACTGCACAGAAG TCCCTGTGCTATTATGCA GATCAACTTACTCTACTTG GCGTGTATTATCTACAGGTT CTAATGTTTTTCAACACGT 23500

23501 GCAGGCTGTTAATAGGGGC TGAACATGTCAACAATCAT ATGAGTGTGCATACCCATT GGTGCAGGTATATGCGCTAG TTATCAGACCCAGACTAATT 23600

23601 CTCTCTGGCGGGCAGTAGT GTAGTAGTCAATCCATCAT TGCCTCACTATGTCACCTG GTGCAGAAAATTCAGTTGCT TACTCTAATAACTTATTGC 23700

23701 CATACCCAAAATTTTACTA TTAGTGTACCACAGAAATT CTACAGTGTCTATGACCAA GACATCAGTAGATTGTACAA TGTACATTTGTGGTATTCA 23800

23801 ACTGAATGCAGCAATCTTT GTTGAATATGGCAGTTTTT GTACACAATTAACCCGTGCT TTAAGTGAATAGCTGTTGA ACAAGACAAAAACCCCAAG 23900

23901 AAGTTTTTGCAAGTCAAA CAAATTTACAAAAACCACC AATTAAGATTTTGGTGGTT TTAATTTTCACAAATATTA CCAGATCCATCAAAACCAAG 24000

24001 CAAGAGGTCATTTATTGAAG ATCTACTTTTCAACAAAGTG ACACTTGCAGATGTGGCTT CATCAACAATATGGTGATT GCCTTGGTGATATTGCTGCT 24100

24101 AGAGACCTCATTTGTGCACA AAAGTTTAAACGGCTTACTG TTTTGCCACCTTTGCTCACA GATGAATGATTGCTCAATA CACTTCTGCATCTTAGCGG 24200

24201 GTACAATCACTTCTGGTTGG ACCTTTGGTGCAGGTGCTGC ATTACAAATACCATTGCTA TGCAATGGCTTATAGGTTT AATGGTATTGGAGTTACACA 24300

24301 GAAATGTTCTATGAGAAC AAAAATTGATTGCCAACCAA TTTAATAGTGCTATTGGCAA AATTCAAGACTCACTTTCTT CCACAGCAAGTGCACCTGGA 24400

24401 AAACCTTCAAGATGTGTCAA CCAAAATGCACAAGCTTTAA ACAGCTTGTGTAACAACCTT AGCTCCAATTTTGGTGCAAT TTCAAGTGTTTTAAATGATA 24500

24501 TCCTTTACGTTCTGACAAA GTTAGGCTGAAGTGCAAAAT TGATAGTTGATCACAGGCA GACTTCAAAGTTTGCAGACA TATGTGACTCAACAATTAAT 24600

24601 TAGAGCTGCAGAAATCAGAG CTTCTGCTAATCTTGCTGCT ACTAAAATGTCAGAGTGTGT ACTTGGACAATCAAAAAGAG TTGATTTTGTGGAAAGGGC 24700

24701 TATCATCTTATGCTCTTCCC TCAGTCAGCACCTCATGGTG TAGTCTTCTGCAATGTGACT TATGTCCTGCACAAGAAAA GAACCTCACAACTGCTCCTG 24800

24801 CCATTTGTCTATGATGAAAA GCACACTTTCCTCTGTAAGG TGCTTTGTGTTCAAATGGCA CACACTGGTTGTGAACAAA AGGAATTTTATGAACCACA 24900

24901 AATCATTACTACAGACAACA CATTTGTGCTGGTAACTGT GATGTGTAATAGGAATTTG CAACAACAGATTTATGATC CTTTGCAACCTGAATTAGAC 25000

25001 TCATTCAAGGAGGAGTAGA TAAATATTTTAAGAATCATA CATCACCAGATGTTGATTTA GGTGACATCTTGGCATTAA TGCTTCAGTTGTAAACATT 25100

25101 AAAAAGAAATTGACCGCTC AATGAGGTGCGCAAGAATTT AAATGAATCTCTATCGATC TCCAAGAACTGGAAAGTAT GAGCAGTATATAAAATGGCC 25200

25201 ATGGTACATTTGGCTAGGTT TTATAGCTGGCTTGATTGCC ATAGTAATGGTGACAATTAT GCCTTGCTGTATGACCAGTT GCTGTAGTTGTCTCAAGGGC 25300

25301 TGTGTGTTCTGTGGATCCTG CTGCAAAATTGATGAAGACG ACTCTAGCCAGTGCTCAA GGAGTCAAATTACATTACAC ATAAACGAACTTATGGATT 25400

25401 GTTTATGAGAATCTTACAAA TTGGAACGTGAACTTGAAG CAAGGTGAATCAAGGATGC TACTCTTCTCAGATTTTGTTC GCGTACTGCAACGATACCG 25500

25501 ATACAAGCTCACTCCCTTT CGGATGGCTTATTGTTGGCG TTGCACTTCTGCTGTTTTT CAGAGCGCTTCCAAATCAT AACCTCAAAAAGAGATGGC 25600

25601 AACTAGCACTCTCAAAGGT GTTCACTTTGTTGCAACTT GCTGTGTTGTTTGTAAACAG TTAAGTCAACCTTTTGTCT GGTGCTGCTGGCTTGAAGC 25700

25701 CCCTTTTCTCTATCTTATG CTTTAGTCTACTTCTGCGAG AGTATAAATTTGTAAGAA AATAATGAGGCTTTGGCTTT GCTGGAATGCGCTTCCAAA 25800

25801 AACCCATTACTTTATGATGC CAACTATTTTCTTGCTGGC ATACTAATGTTACGACTAT TGTATACCTTACAATAGTGT AACTTCTCAATTGTCATTA 25900

25901 CTTCAGGTGATGGCACAACA AGTCTATTTCTGAACATGA CTACAGATTTGGTGGTTATA CTGAAAAATGGAATCTGGA GTAAAAAGACTGTGTTGATT 26000

26001 ACACAGTTACTTCACTTCAG ACTATTACCAGCTGTACTCA ACTCAATTGAGTACAGACAC TGGTGTGAACATGTTACCT TCTTCTATCAATAAAATT 26100

26101 GTTGATGAGCCTGAAGAACA TGTCCAAATTCACACAATCG ACGGTTATCTCCGAGTTGTT AATCCAGTAATGGAACCAAT TTATGATGAACCGACGACGA 26200

26201 CTACTAGCGTGCTTTGTAA GCACAAGCTGATGAGTACGA ACTTATGACTCATTCGTTT CGGAAGAGACAGGTACGTTA ATAGTTAATAGCTACTTCT 26300

26301 TTTTCTGTCTTCTGTTGAT TCTTGCTAGTTACACTAGCC ATCTTACTGCGCTTCGATT GTGTGCTGACTGCTGCAATA TTGTTAACGTGAGTCTTGTA 26400

26401 AAACCTCTTTTTACGTTTA CTCTCGTGTAAAAATCTGA ATTCTTCTAGAGTTTCTGAT CTCTGCTTAAACGAACTA AATATTATATTAGTTTTTCT 26500

26501 GTTTGGAACTTAATTTTAG CCATGGCAGATTCCAACGGT ACTATTACCGTGAAGAGCT TAAAAAGCTCCTTGAACAAT GGAACCTAGTAATAGTTTC 26600

26601 CTATTCCTTACATGGATTG TCTTCTACAATTTGCCTATG CCAACAGGAATAGGTTTTTG TATATAATTAAGTTAATTTT CCTCTGGCTGTTATGGCCAG 26700



26701 TAACTTTAGCTTGTITTTGTG CTTGCTGCTGTTTACAGAAT AAATGGATCACCGGTGGAA TTGCTATCGCAATGGCTTGT CTTGTAGGCTTGATGTGGCT 26800

26801 CAGCTACTTCATTGCTTCTT TCAGACTGTTTGGCGGTACG CGTTCATGTGGTCATTCAA TCCAGAACTAACATTCTTC TCAACGTGCCACTCCATGGC 26900

26901 ACTATTCTGACCAGACCGCT TCTAGAAAGTGAAGCTGTAA TCGGAGCTGTGATCCTTCGT GGACATCTTCGTATTGCTGG ACACCATCTAGGACGCTGTG 27000

27001 ACATCAAGGACCTGCCTAAA GAAATCACTGTGCTACATC ACGAACGCTTTCTTATTACA AATTGGGAGCTTCGCAGCGT GTAGCAGGTGACTCAGGTTT 27100

27101 TGCTGCATACAGTCGCTACA GGATTGGCAACTATAAATTA AACACAGACCATTCAGTAG CAGTGACAATATTGCTTTGC TTGTACAGTAAGTGACAACA 27200

27201 GATGTTTTCATCTCGTTGACT TTCAGGTTACTATAGCAGAG ATATTACTAATTATTATGAG GACTTTTAAAGTTTCATTT GGAATCTTGATTACATCATA 27300

27301 AACCTCATAATTAAAAATTT ATCTAAGTCACTAACTGAGA ATAAATATTCTCAATTAGAT GAAGAGCAACCAATGGAGAT TGATTAAACGAACATGAAAA 27400

27401 TTAITCTTTTCTTGGCACTG ATAACACTCGCTACTTGTGA GCTTTATCACTACCAAGAGT GTGTTAGAGGTACAACAGTA CTTTTAAAGAACCTTGCTC 27500

27501 TTCTGGAACATACGAGGGCA ATTCACCATTTTCACTCTTA GCTGATAACAAATTTGCACT GACTTGCTTTAGCACTCAAT TTGCTTTTGCTTGCTCGAC 27600

27601 GGCCTAAACACGTTCTATCA GTTACGTGCCAGATCATTT CACCTAACTGTTCATCAGA CAAGAGGAAGTCAAGAACT TTACTCTCCAATTTTCTTA 27700

27701 TTGTTGCGGCAATAGTGTTT ATAACACTTTGCTTCACACT CAAAAGAAAGACAGAATGAT TGAACTTTCATTAATTGACT TCTATTGTGCTTTTITAGCC 27800

27801 TTTCTGCTATTCTTGTTTT AATTATGCTTATTATCTTTT GGTTCCTCACTTGAAGTCAA GATCATAATGAACTTGTC ACGCTAAACGAACATGAAAT 27900

27901 TTCTTGTTTCTTAGGAATC ATCACAACGTAGCTGCATT TCACCAAGAATGTAGTTTAC AGTCATGTACTCAACATCAA CCATATGTAGTTGATGACCC 28000

28001 GTGTCTTATCACTTCTATT CTAATGTGTATATTAGAGTA GGAGCTAGAAAATCAGCACC TTAATTGAATTGTGCGTGG ATGAGGCTGGTCTCAAATCA 28100

28101 CCCATTCTAGTACATCGATAT CGGTAATTATACAGTTTCTT GTTACCTTTTACAATTAAT TGCCAGGAACCTAAATGGG TAGTCTGTAGTGCCTGTT 28200

28201 CGTCTATGAAGACTTTTTA GAGTATCATGACGTTCTGTC TTGTAGATCTGTCTCTAAA CGAACAACCTAAATGCTG ATAATGGACCCCAAAATCAG 28300

28301 CGAAATGCACCCCGCATAC GTTTGGTGGACCCCTCAGATT CAACTGGCAGTAACCAAGAT GGAGAACGCAGTGGGGCGCG ATCAAAACAACGTCGGCCCC 28400

28401 AAGGTTTACCAATAATACT CGCTTCTGGTTACCCGCTCT CACTCAACATGCGAAGGAAG ACCTTAAATCCCTCGAGGA CAAGGCGTTCCAATTAACAC 28500

28501 CAATAGCAGTCCAGATGACC AAATTGGTACTACCGAAGA GCTACCAGACGAATTCGTGG TGGTGACGGTAAATGAAAG ATCTCAGTCCAAGATGGTAT 28600

28601 TTCTACTACTAGGAAGTGG GCCAGAAGCTGGACTTCCCT ATGGTGTAACAAAGACGCG ATCATATGGGTTGCAACTGA GGGAGCCTTGAATACACCA 28700

28701 AAGATCACATTGGCACCCGC AATCTGTCTAACATGTGCG AATCGTGCTACAATCTCTC AAGGAACAACATTGCCAAAA GGCTTCTACGCAGAAGGAG 28800

28801 CAGAGGCGGCAGTCAAGCCT CTTCTGTTCTCTATCAGT AGTCGCAACAGTTCAAGAAA TTCACTCCAGGCAGCAGTA GGGGAAGTCTCTGCTAGA 28900

28901 ATGGCTGGCAATGGCGGTGA TGCTGCTCTGCTTTGCTCG TGCTTGACAGATTGAACCAG CTTGAGAGCAAAATGTCTGG TAAAGGCCAACACAACAAG 29000

29001 GCCAAACTGTCACTAAGAAA TCTGCTGCTGAGGCTTCTAA GAAGCCTCGGCAAAAACGTA CTGCCACTAAAGCATACAAT GTAACACAAGCTTTCGGCAG 29100

29101 ACGTGGTCCAGAACAAACCC AAGGAAATTTGGGGACCAG GAACTAATCAGACAAGGAAC TGATTACAACATTGGTTCG AAATTGCACAATTTGCCCCC 29200

29201 AGCGCTTCAGCGTTCTCGG AATGTCGCGCATTTGGCATG AAGTCACACCTTCGGGAACG TGGTTGACCTACACAGGTGC CATCAATTGGATGACAAAG 29300

29301 ATCCAAATTTCAAGATCAA GTCATTTTGTCTAATAAGCA TATTGACGCATACAAAACAT TCCCACCAACAGAGCCTAAA AAGGACAAAAGAAGAAGGC 29400

29401 TGATGAAACTCAAGCCTTAC CGCAGAGACAGAAAGAACAG CAAACTGTGACTCTTCTTCC TGCTGCAGATTGGATGATT TCTCCAAACAATTGCAACAA 29500

29501 TCCATGAGCAGTGCTGACTC AACTCAGGCCTAAACTCATG CGACCGCTTGGCCTCCGACT TGCTATATAAACGTTTTTCG TTTCCGTTTACGATATATA 29600

29601 GTCTACTCTTGTGCAGAATG AATTCTCGTAACTACATAGC ACAAGTAGATGTAGTTAAT TTAATCTACATAGCAATCT TTAATCAGTGTGTAACATTA 29700

29701 GGGAGGACTTGAAAGACCA CCAAGTCGGATCGTAGCCAT GTCGTAGTAGCATCGAGTGT ACAGTGAAACAATGCTAGGA GAGTCGCATATGGAAGAG 29800

29801 CCCTAATGTGTAAATAAT TTAGTAGTGCTATCCCCAT GTGATTTTAATAGCTTCTTA GGAGAATGACAAAAAAAAA AAAAAAAAAA 29891

### 1.9. SRR12596175 Assembled Contig Spike Protein Sequence

1 MFLLTTRTMFVLVLLPLV SSQCVNLTRTQLPPAYTNS FTRGVYYPDKVFRSVLHST QDLFLPFFSNVTWFHAIHVS GTNGTKRFDNPVLPFNDGVY 100

101 FASTEKSNIIRGWIFGTTLD SKTQSLIIVNNATNVIVKVC EFQFCNDPFLGVYYHKNNKS WMESEFRVYSSANNCTFEYV SQPFLMDLEGKQGNFKNLRE 200

201 FVFKNIDGYFKIYSKHTPIN LVRLDPQGFSALEPLVDLPI GINITRFQTLALHRSYLTP GDSSSGWTAGAAAYVGYLQ PRFLFKYNENGTTTDAVDC 300

301 ALDPLSETCKTLKSFTVEKG IYQTSNFRVQPTESIVRFPN ITNLCPFGEVFNATREASVY AWRNRKRISNCVADYSVLNS ASFSTFKCYGVSPTKLNDLC 400

401 FTNVYADSFVIRGDEVQRQA PGQTGKIADYNYKLPDDFTG CVIAWNSNNLDSKVGGNYN YLYRLFRKSNLKPFERDISTE IYQAGSTPCNGVEGFNCYFP 500

501 LQSYGFQPTNGVGYQPYRVV VLSFELLHAPATVCGPKKST NLVKNKCVNFNFNGLTGTGV LTESNKKFLPFQQFGRDIAD TTDAVRDPQTLEILDITPCS 600

601 FGGVSVITPGTNTSNQVAVL YQGVNCTEVPVAIHADQLTP TWRVYSTGSNVFQTRAGCLI GAHVNNNSYECDIPIGAGIC ASYQTQTNSPRRARSVASQS 700

701 IIAYMSLGAENSVAYSNNS IAIPTNFTISVTTEILPVSM TKTSVDCTMYICGDSSTECN LLLQYGSFCTQLNRALTGIA VEQDKNTQEVFAQVKQIYKT 800

801 PPIKDFGGFNFSQILPDPSK PSKRSHEDLLFNKVTLADA GFIKQYGDCLGDIAARDLIC AQKFNGLTVLPPLTDEMIA QYTSALLAGTTTSGWTFGAG 900

901 AALQIPFAMQAYRFNGIGV TQNVLYENQKLIANQFNSAI GKIQDSLSTASALGKLQDV VNQNAQALNTLVKQLSSNFG AISSVLNDILSRDKVEAEV 1000

1001 QIDRLITGRQLSQTYVTYQG LIRAAEIRASANLAATKMSE CVLGQSKRVDFCGKGYHLMS FPQSAPHGVVFLHVTYVPAQ EKNFTTAPAICHGKAHFPR 1100

1101 EGVFVSNTHGWFTVQRNFYE PQIITDNTFVSGNCDVVIG IVNNTVYDLPQPELDSFKEE LDKYFKNHTSPVDLGDISG INASVVNIQKEIDRLNEVAK 1200

1201 NLNESLIDLQELGKYEQYIK WPWYIWLGFIAGLIAIVMT IMLCCMTSCCCLKGCCSCG SCCKFDEDDSEPVLKGVKLH YT 1282

### 1.10. SRR12596175 Discovered Strain 1 Possible Spike Protein Sequence

1 MFLLTTRTMFVLVLLPLV SSQCVNLKSRTQLPPAYTNS FTRGVYYPGKVFRRSVLHST QDLFLPFFSNVTWFHAIHVS GTIGTKRFDNPVLPFNDGVY 100

101 FASTEKSIIIRGWIFGTTLD SKTQSLIIVNNSTNVIVKVC EFQFCNDPFLGVYYHKNNKS WMESEFRVYSSANNCTFE-V SQPFLMDLEGKQGNFKNLRE 200

201 FVFKNIDGYFKIYSKHTPIN LVRLDPQGFSALEPLVDLPI GINITRFQIILSLHRSYLTP GDSSSGWTAGAAAYVGYLQ PRSFLFKYNENGTTTDAVDC 300

---

```
301 ALDPLSGTKCTLKSFTVEKG IYQTSNFRVQPTESIVRFPN IKYLCPFGEVFNATRFASVY AWRNKRISNCVADYSVLYNS VPSTFKCYGVSPTKLNDLC 400
401 FTNVYADSFVIRGDEVRLQA PGQTGKIADYNYKLPDDFTG CVIAWNSNNLDSKVGGNYN YLYRFRKSNLKPFEERDISTE IYQAGSTPCNGVEGFNCYFL 500
501 LQLYGFQPTNGVGYPYRVV VLSFELLHAPATVCASKKST NLVKNKCVNFNFNGLTGTGV LTESNKSFCLENNLAETLLT LLMLSEVHRHLRFLTLHHVL 600
601 LVVSVL-RQEQILLTRLLFF IRVSTAQKSLLLFMQINLLL LGVFILQVLKFLKHVQAV- GLNMSTTHMSVTPYPLVQVYA LVIRLSLILGGHVV-LVNP 700
701 SLHSLCHLVQKIQLLTLTL LPYPQILLVLVLPQKYQCL- PRHQ-IVQCTFGMIQLNAAI YCCNMAVVFHN-TVL-LE-L LNKTKTPKKFVHKSNNKFTKH 800
801 HQLKILVVLIFHK-FQIHQN QARGHLLKIYFSTK-HLQLL ASSNNMVIALVILLLEPSFV HKSLTALLFCHLCSQIR-LL NTLLHC-RVLSLVGGLVQV 900
901 LHYYKHYVLCKWIGLGMVLEL HRMPMSRMTKN-LPTNLIVLL AKFKTHFLPQQANLENFKMW STKMHL-TRLLNNLAPILV QFQVF-MISFHVLTCLRKCC 1000
1001 KLIG-SQADFNVCRRH-LNN -LELQKSELLILLLLNCQS VYLDNQKELIFVERAIIICP SLSQHLMV-FSCM-LMSLHK KRTSQLLLLPFVMMME-HTFLV 1100
1101 KVSFLQMAHTGL-HKGIFMN HKSLLQTTHLCIVTVML-E VSTTQFMILCNLN-THSRRS -INILRIIHHQMLI-VTSLA LMLQL-TYKKKLTASMLQ- 1200
1201 F-MNLSSISKNLSESSI-M AMVHLARFYSWLDCHSNGDN YALLYDQLL-LSQGLLFLGI LLQI-RRL-ASAQRSQITL HI 1282
```

### 1.11. Difference of SRR11092062 Discovered Strain 1 Spike Protein Sequence and SARS-CoV-2 Spike Protein Sequence

The format of EMBOSS Needle is that each three lines followed an empty line, the first in the three lines is 50 amino acid bases of SARS-CoV-2 original strain spike protein, the second line is the matching status, and the third line is 50 amino acid bases of discovered strain 1. | means the two bases at the position in the first protein sequence and the second protein sequence are the same, other signs mean the two bases are different. The figure is located at [1](#) and [1](#).

### 1.12. SRR12596175 Discovered Strain 2 Possible Spike Protein Sequence

```
1 MFLTTKRTMFVFLVLLPLD SSQCVNLTRTQLPPAYTNS FTRGVYYPDKVFRSSVLHST QDLFLPFSNVTWFHAIHVS GTNGTKRFDNPVLPFNDGVY 100
101 FASTEKSNIRGWFPGTTLD SKTQSLILVNATNVIVKVC EFQFCNDPFLGVYHHKNNKS WMESEFRVYSSANNCTFEYV SQPFLMDLEGKQGNFKNLR 200
201 VFVKNDIDGYFKIYKHTPIN LVRLDLPQGSFALEPLVDLPM GINTRFQTLALHRSYLTG GDSSSGWTAGAAAYVGYLQ PRTFLKYNENGTTTDAVDC 300
301 ALDPLSETKCTLKSFTVEKG IYQTSNFRVQPTESIVRFPN ITNLCPFGEVFNATRFASVY AWRNKRISNCVADYSVLYNS ASFSTFKCYGVSPTKLNDLC 400
401 FTNVYADSFVIRGDEVRLQA PGQTGKIADYNYKLPDDFTG CVIAWNSNNLDSKVGGNYN YLYRFRKSNLKPFEERDISTE IYQAGSTPCNGVEGFNCYFP 500
501 LQSYGFQPTNGVGYPYRVV VLSFELLHAPATVCGPKKST NLVKNKCVNFNFNGLTGTGV LTESNKKFLPQQFGRDIAD TTDVAVRDPQTLEILDITPCS 600
601 FGGVSVITPGTNSNQAVL YQGVNCTEVPVAIHADQLTP TWRVYSTGSNVQTRAGCLI GAHVNNNSYECIDIPIGAGIC ASYQTQTNSPRRARSVASQS 700
701 IIAYTMSLGAENSVAYSNNS IAIPNTFTISVTTEILPVSM TKTSVDCTMYICGDSCECSN LLLQYGSFCTQLNRALTGIA VEQDKNTQEVFAQVKQIYKT 800
801 PPIKDFGFGNFSQILPDPK PSKRSFIEDLLFNKVTLADA GFIKQYGDCLGDIAARDLIC AQKFENGLTVLPPLTDEMIA QYTSALLAGTTTSGWTFGAG 900
901 AALQIPFAMQAYRNGVIG TQNVLYENQKLIANQFNSAI GKIQDSLSTASALGKLQDV VNQNAQALNTLVKQLSSNFG AISSVLNDILSRDKVEAEV 1000
1001 QIDRLITGRLQSLQTYVTQQ LIRAAEIRASANLAATKMSE CVLGQSKRVDPCGKGHYHLS FPQSAPHGVVFLHVTYVPAQ EKNFTTAPAICHDGKAHFPR 1100
1101 EGVFVSNGTWFWFTQRNFYE PQIHTDNTFVSGNCDVVG IVNNTVYDPLQPELDSFKEE LDKYFKNHTSPDVLGDISG INASVNIQKEIDRLNEVAK 1200
1201 NLNESLIDLQELGKYEQYIK WPWYIWLGIAGLIAIVMVT IMLCCMTSCCCLKGCCSCG SCCKFDEDDSEPVKGVKLH YT 1282
```

#### 1.12.1. Difference of Discovered Strain 2 Spike Protein Sequence and SARS-CoV-2 Spike Protein Sequence

The format of EMBOSS Needle is that each three lines followed an empty line, the first in the three lines is 50 amino acid bases of SARS-CoV-2 original strain spike protein, the second line is the matching status, and the third line is 50 amino acid bases of discovered strain 2. | means the two bases at the position in the first protein sequence and the second protein sequence are the same, other signs mean the two bases are different. The figure is located at [2](#) and [2](#).

### 1.13. SRR12596175 Assembled Contig Nucleotide Sequence

```
1 GTGTCATCCCCATGTGATT TTTTGTGTCATTCTCTAA GAAGCATATAAAATCACATG GGGATAGCACTACTAAAATT AATTTTACACATTAGGGCTC 100
101 TTCCATATAGGCAGCTCTCC CTAGCATTTGTCACGTGACA CTCGATCGTACTCCGCGTGG CCTCGTGAAAATGTGGTGG CTCCTTCAAGTCCTCCCTAA 200
201 TGTATACACTGATTAAGA TGTGATGTGAGATTAAGT TAACTACATCTACTGTGCT ATGTAGTTACGAGAATTCAT TCTGCACAAGAGTAGACTAT 300
301 ATATCGTAAACGGAAAAGCG AAAACGTTTATATAGCCCAT CTGCGTGTGTGGTCTGCAT GAGTTTAGGCCTGAGTTGAG TCAGCACTGCTCATGGATTG 400
401 TTGCAATTGTTGGAGAAAT CATCCAAATCTGCAGCAGGA AGAAGAGTACAGTTTGCTG TTTCTTCTGTCTCTGCGGTA AGGCTTGAGTTTCATCAGCC 500
501 TTTCTTTTGTGCTCTTTT AGGCTCTGTGGTGGGAATG TTTGTATGCGTCAATATGC TTATTCAGCAAATGACTTG ATCTTTGAAATTTGGATCTT 600
601 GTGTCACCAATTGTATGGCA CCTGTGTAGGTCAACCACGT TCCCGAAGGTGTGACTTCCA TGCCAATGCGCGACATCCG AAGAAGCTGAAGCGCTGGG 700
701 GGCAAATGTGCAATTGCG GCCAATGTTGTAATCAGTT CTTGTCTGATAGTCTCTG GTCCCCAAAATTCCTTGGG TTGTCTTGAGACCAGCTCTG 800
801 CCGAAAGCTGTGTACATT GTATGCTTAGTGCGAGTAC GTTTTGCCGAGGCTTCTTA GAAGCCTCAGCAGCAGATT CTTAGTGACAGTTTGGCCTT 900
901 GTTGTGTGTGGCCTTTACCA GACATTTTGCTCTCAAGCTG GTTCAATCTGTCAAGCAGCA GCAAAGCAAGAGCAGCATCA CCGCCATTGCCAGCCATTCT 1000
1001 AGCAGGAGAAGTCCCTTAC TGCTGCCTGGAGTTGAATTT CTTGAATCTGTGCGACTACG TGATGAGGAACGAGAAGAGG CTTGACTGCCGCCTCTGCTC 1100
1101 CCTTCTGCGTAGAAGCCTTT TGGCAATGTTGTTCTTGAG GAAGTTGTAGCAGCATTGCA GCATTGTAGCAGCATTGCG GGTGCCAATGTGATCTTTTG 1200
1201 GTGTATTCAAGGCTCCCTCA GTTGCAACCATATGATGCC GTCTTTGTAGCACCATAGG GAAGTCCAGCTTCTGGCCCA GTTCTAGGTAGTAGAAATA 1300
```

1301 CCATCTTGGACTGAGATCTT TCATTTTACCGTCACCACCA CGAATTCGTCTGGTAGCTCT TCGGTAGTAGCCAATTTGGT CATCTGGACTGCTATTGGTG 1400

1401 TTAATTGGAACGCCTTGTCC TCGAGGGAATTTAAGGTCTT CCTTGCCATTGTGAGTGAGA GCGGTGAACCAAGACGCAGT ATTATTGGGTAAACCTTGGG 1500

1501 GCCGACGTTGTTTGATCGC GCCCCACTGCGTTCCTCATT CTGGTTACTGCCAGTTGAAT CTGAGGGTCCACCAAACGTA ATGCGGGGTGCATTTCGCTG 1600

1601 ATTTTGGGGTCCATTATCAG ACATTTTAGTTTGTTCGTTT AGATGAAATCTAAAAACA CGAACGTCATGATACTCTAA AAAGTCTTCATAGAACGAAC 1700

1701 AACGCACTACAAGACTACCC AATTAGGTTCTTGGAATT AATTGTAAGGTAAACAGG AAAGTGTATAATTACCGATA TCGATGTACTGAATGGGTGA 1800

1801 TTAGAACCAACCTCATCCA CGCACAATTCAATTAAGGT GCTGATTTTCTAGCTCCTAC TCTAATATACCATTAGAAT AGAAGTGAATAGGACACGGG 1900

1901 TCATCAACTACATATGGTTG ATGTTGAGTACATGACTGTA AACTACATTCTTGGTGAAAT GCAGTACAGTTGTGATGAT TCCTAAGAAAAAAGAAATT 2000

2001 TCATGTTCGTTTAGGCGTGA CAAGTTTCATTATGATCTG CAGTTCAGTGAGAACCCAA AGATAATAAGCATAATTAACAAAGGAATAGCAGAAAGGC 2100

2101 TAAAAAGCACAAATAGAAAGT CAATTATGAAAGTTCAATC ATTCTGTCTTCTTTTGAAGT GTGAAGCAAAGTGTATTAAC CACTATTGCCGCAACAATAA 2200

2201 GAAAAATTGGAGAGTAAAGT TCTTGAACCTCTCTTGTCT GATGAACAGTTTAGGTGAAA CTGATCTGGCAGCTAACTGA TAGACGTGTTTTACGCCGTC 2300

2301 AGGACAAGCAAAAGCAAATT GAGTGTAAAGCAAGTCAGT GCAAAATTGTTATCAGCTAG AGGATGAAATGGTGAAATGC CCTCGTATGTTCCAGAAGAG 2400

2401 CAAGGTTCTTTTAAAGTAC TGTGTACCTCTAACACACT CTTGCTAGTGATAAAGTCA CAAGTAGCGAGTGTATCAG TGCCAAGAAAAGAATAATT 2500

2501 TCATGTTCGTTTAAATCAAT TCCATTGGTTGCTCTTCATC TAATTGAGAATATTTATCT CAGTTAGTGAAGTATAGATAA TTTTAAATATGAGGTTTAT 2600

2601 GATGTAATCAAGATTCCAAA TGGAAACTTTAAAGTCCTC ATAATAATTAGTAATATCTC TGCTATAGTAACCTGAAAGT CAACGAGATGAAACATCTGT 2700

2701 TGTCACTTACTGTACAAGCA AAGCAATATTGTCACTGCTA CTGGAATGGTCTGTGTTAA TTTATAGTTGCCAATCCTGT AGCGACTGTATGCAGCAAAA 2800

2801 CCTGAGTCACCTGTACACG CTGCGAAGCTCCCAATTTGT AATAAGAAAGCGTTCGTGAT GTAGCAACAGTGATTCTTT AGGCAGGTCCTTGATGTCAC 2900

2901 AGCGTCCTAGATGGTGCCA GCAATACGAAGATGCCAGG AAGGATCACAGCTCCGATTA CGAGTTCACTTTCTAGAAGC GGTCTGGTCAGAATAGTGCC 3000

3001 ATGGAGTGGCAGCTTGAGAA GAATGTTAGTTTCTGGATTG AATGACCACATGGAACCGGT ACGCGCAACAGCTGTAAGG AAGCAATGAAGTAGCTGAGC 3100

3101 CACATCAAGCTACAAGACA AGCCATTGCGATAGCAATTC CACCGGTGATCCAATTTATT CTGTAACAGCAGCAAGCAC AAAACAAGCTAAAGTTACTG 3200

3201 GCCATAACAGCCAGAGGAAA ATTAACTTAATTATATACAA AAACCTATTCTGTTGGCAT AGGCAAAATGTAGAAGACAA ATCCATGTAAGGAATAGGAA 3300

3301 ACCTATTACTAGTTCCATT GTTCAAGGAGCTTTTAAAGC TCTTCAACGTAATAGTACC GTTGAATCTGCCATGCTA AAATTAAGTTCCAACAGA 3400

3401 AAAACTAATATAATTTAG TTCGTTTAGACCAGAAGATC AGGAACTCTAGAAGAATTCA GATTTTAAACAGAGAGTAA ACGTAAAAAGAAGGTTTAC 3500

3501 AAGACTCAGTTAACAATAT TGCAGCAGTACGCACACAAT CGAAGCGCAGTAAGGATGGC TAGTGTAAGTACGAAGAATA CCACGAAAGCAAGAAAAAGA 3600

3601 AGTAGCTATTAAGTATTAAGTACCTGTCTCTCCGAAA CGAATGAGTACATAAGTTCG TACTCATCAGCTTGTGCTTA CAAAGGCACGCTAGTAGTCG 3700

3701 TCGTCGGTTATCATAAATT GGTTCATTACTGGATTAAC AACTCCGGATGAACCGTCGA TTGTGTGAATTTGGACATGT TCTCAGGCTCATCAACAAT 3800

3801 TTTATTGTAGTGAAGAAGG TAACATGTTCAACACCAAGT TCTGTACTCAATTGAGTTGA GTACAGCTGGTAATAGTCTG AAGTGAAGTAACTGTGTAAT 3900

3901 ACAACACAGTCTTTTACTCC AGATTCCCAATTTTTCAGTAT AACCACCAATCTGGTAGTCA TGTTCAGAAATAGGACTTGT TGTGCCATCACCTGAAGTAA 4000

4001 TGACAATTGAAGAAGTTACA CTATTGTAAGGTATACAATA GTCGTAACAATTAGTATGCC AGCAAGAAAAATAGTTGGCA TCATAAGTAATGGGTTTTT 4100

4101 GGAACGCGATTTCAGCAAA GCCAAAGCCTCATTATTATT CTTACAAAGTTTACTCTG CAAGAAGTAGACTAAAGCAT AAAGATAGAGAAAAGGGCT 4200

4201 TCAAGGCGCAGCAACGAG CAAAAGGTGTGAGTAAAGTCTTACAACAACAACAGCAAG TTGCAAAACAAAGTGAACACC CTTGAGAGTGCTAGTTGCC 4300

4301 ATCTCTTTTGAAGGTTATG ATTTTGGAAGCGCTATGAAA AACAGCAAGAAGTGCAACGC CAACAATAAGCCATCCGAAA GGGAGTGAGGCTTGATCGG 4400

4401 TATCTGTGAGTAGCGCGAA CAAAATCTGAAGGAGTAGCA TCCTTGATTTCACCTTGCTT CAAAGTTACAGTTCCAATTG TGAAGATTCTCATAAACAAA 4500

4501 TCCATAAGTTTCGTTATGTG TAAATGTAATTGACTCCTTT GAGCACTGGCTCAGATCGT CTTTCATCAAATTTGCAGCAG GATCCACAAGAACACAGCC 4600

4601 CTTGAGACAACTACAGCAAC TGGTCATACAGCAAAAGCATA ATTGTCACCATTACTATGGC AATCAAGCCAGCTATAAAAC CTAGCCAAATGTACCATGGC 4700

4701 CATTTTATATACTGCTCATA CTTTCCAAGTTCTTGAGAT CGATGAGAGATTCAATTAAA TTCTTGGAACCTCATTGAG GCGGTCAATTTCTTTTTGAA 4800

4801 TGTTTACAACCTGAAGCATT AATGCCAGAGATGTCACCTAA ATCAACATCTGGTGATGAT GATTCTTAAATATTATCT AACTCTCCTTGAATGATC 4900

4901 TAATTGAGTTGCAAGGAT CATAAATCTGTGTTGACA ATTCTATTACAACATCACA GTTACCAGACACAATGTGT TGCTGTAGTAATGATTGT 5000

5001 GGTTTCATAAAATTCCTTG TGTTACAACACAGTGTGTGC CATTGAAACAAGACACCT TCACGAGGAAAGTGTGCTTT TCCATCATGACAAATGGCAG 5100

5101 GAGCAGTTGTGAAGTCTTT TCTTGTGACGGACATAAGT CACATGCAAGAAGACTACAC CATGAGGTGCTGACTGAGGG AAGGACATAAGATGATAGCC 5200

5201 CTTTCCACAAAATCAACTC TTTTGTATGTCCAAGTACA CACTCTGACATTTTAGTAGC AGCAAGATTAGCAGAAGCTC TGATTTCTGCAGCTCTAAT 5300

5301 AATTGTGAGTCACATATGT CTGCAAACTTTGAAGTCTGC CTGTGATCAACCTATCAATT TGCATTACGCTCAACTTT GTCAAGACGTGAAAGGATAT 5400

5401 CATTTAAACACTTGAAATT GCACAAAATTTGGAGCTAAG TTGTTTAAACAGCGTGTTA AAGCTTGTGATTTTGGTIG ACCACATCTGAAGTTTCC 5500

5501 AAGTGCACTGTCTGTGAAG AAAGTGAGTCTTGAATTTTG CCAATAGCACTATTAAATTG GTTGCCAATCAATTTTGGT TCTCATAGAGAACATTCTGT 5600

5601 GTAACCTCAATACCATTAAC CTTAAGCCATTGTCATAG CAAATGGTATTGTGAATGCA GCACCTGCACCAAGGTCCA ACCAGAAGTGATTGTACCCG 5700

5701 CTAACAGTGCAGAAGTGTAT TGAGCAATCATTTCTCTGT GAGCAAAAGGTGCAAAACAG TAAGGCCGTAAAACCTTTGT GCACAAATGAGGTCTCTAGC 5800

5801 AGCAATATCACCAAGGCAAT CACCATATTGTTTGATGAAG CCAGCATCTGCAAGTGTAC TTTGTTGAAAAGTAGATCTT CAATAATGACCTCTTGCTT 5900

5901 GGTTTGATGGATCTGGTAA TATTGTGAAAAATTAAC CACCAAAATCTTTAATGGT GGTGTTTGTAAAATTTGTTT GACTGTGCAAAAACCTCTT 6000

6001 GGGTGTTTTGTCTGTGTCA ACAGCTATTCCAGTTAAAGC ACGGTTTAATTGTGTACAAA AACTGCCATATTGCAACAAA AGATTGCTGCATTCAAGTTGA 6100

6101 ATCACCACAATGTACATTG TACAATCTACTGATGCTTG GTCATAGACACTGGTAGAAT TTCTGTGTAACACTAATAG TAAAATTTGTTGGTATGGCA 6200

6201 ATAGAGTTATTAGAGTAAGC AACTGAATTTTCTGCACCAA GTGACATAGTGTAGGCAATG ATGGATTGACTAGCTACACT ACGTCCCGCCGAGGAGAAT 6300

6301 TAGTCTGAGTCTGATACTA GCGCATATACCTGCACCAAT GGTGATGTACACTCATATG AGTTGTTGACATGTTACGCC CCTATTAAACAGCCTGCACG 6400

6401 TGTTTGAACAAATAGAAC CTGTAGAATAAACACGCCAA GTAGGAGTAAGTTGATCTGC ATGAATAGCAACAGGACTT CTGTGAGTTAACACCCTGA 6500

6501 TAAAGAACAGCAACCTGGTT AGAAGTATTGTTCCTGGTG TTATAACACTGACACCACCA AAAGAACATGGTGTAATGTC AAGAATCTCAAGTGTCTGTG 6600

6601 GATCACGGACAGCATCAGTA GTGTCAGCAATGTCTCTGCC AAATTGTGGAAGGCAGAA ACTTTTGTAGACTCAGTA AGAACACCTGTGCTGTAA 6700

6701 ACCATTGAAGTTGAAATTGA CACATTGTTTTTAACCAA TTAGTAGACTTTTTAGGTCC ACAACAGTTGCTGGTGCAT GTAGAAGTTCAAAAGAAAGT 6800

6801 ACTACTACTCTGTATGGTTG GTAACCAACACCATTAGTGG GTTGGAAACCATATGATTGT AAAGGAAAGTAACAATTAAA ACCTTCAACACCATTACAAG 6900

6901 GTGTGCTACCGGCTGATAG ATTTCAAGTTGAAATATCTCT CTCAAAAGGTTTGAGATTAG ACTTCCTAAACAATCTATAC AGGTAATTATAATTACCACC 7000

7001 AACCTTAGAATCAAGATTGT TAGAATTCCAAGCTATAACG CAGCGTGTAAAATCATCTGG TAATTTATAATTATAATCAG CAATCTTCCAGTTGCCCT 7100

7101 GGAGCGATTGTCTGACTTC ATCACCTCTAATTACAAATG AATCTGCATAGACATTAGTA AAGCAGAGATCATTAAATTT AGTAGGAGACACTCCATAAC 7200

7201 ACTTAAAGTGGAATATGAT GCGGAATTATATAGGACAGA ATAATCAGCAACACAGTTGC TGATTCTCTTCTGTTCCAA GCATAAACAGATGCAAACT 7300

7301 GGTGGCGTAAAAAAGTTTCA CAAAAGGGCACAAGTTTGTG ATATTAGGAAATCTAACAAT AGATTCTGTGTGGTGGACTC TAAAGTTAGAAGTTGATAG 7400

7401 ATTCCTTTTCTACAGTGAA GGATTTCAACGTACACTTTG TTTCTGAGAGAGGGTCAAGT GCACAGTCTACAGCATCTGT AATGGTTCCATTTTCATTAT 7500

7501 ATTTTAATAGAAAAGTCCTA GGTGTGAAGATAACCCACATA ATAAGCTGCAGCACCAGCTG TCCAACCTGAAGAAGAATCA CCAGGAGTCAAAACTTCT 7600

7601 ATGTAAAGCAAGTAAAGTTT GAAACCTAGTGATGTTAATA CCTATTGGCAAATCTACCAA TGGTCTAAAGCCGAAAAAC CCTGAGGGAGATCAGCACT 7700

7701 AAATTAATAGGCGTGTGCTT AGAATATATTTTAAATAAC CATCAATATTTCTTAAACACA AATTCCTTAAGATTTTGTAA ATTACCTGTTTTCTCTCAA 7800

7801 GGTCCATAAGAAAAGGCTGA GAGACATATTCAAAGTGCA ATTATTGCGACTAGATAAAA CTCTGAACCTCACTTTCCATC CAATCTTGTGTTTTGTG 7900

7901 GTAATAAACCCCAAAATGAT CATTACAAAATTGAAAT TCACAGACTTTAATAACAAC ATTAGTAGCGTTATTAAACA TAAGTAGGGACTGGGTCTC 8000

8001 GAATCTAAAGTAGTACCAAA AATCCAGCCTCTTATTATGT TAGACTTCTCAGTGAAGCA AAATAAACACCATCATIAAA TGGTAGGACAGGGTATCAA 8100

8101 ACCTCTTAGTACCATTTGGTC CCAGAGACATGTATAGCATG GAACCAAGTAACATTGGAAA AGAAAGGTAAGAACAAGTCC TGAGTTGAATGAAAACTGA 8200

8201 GGATCTGAAAACCTTTGTCAG GGTAATAAACACCACGTGTG AAGAATTAGTGTATGCAGG GGGTAATTGAGTTCTGGTTG TAAGATTAAACACTGACTA 8300

8301 GAGACTAGTGGCAATAAAAC AAGAAAAACAACATTGTTC GTTAGTTGTIAACAAGAAC ATCACTAGAAAATAACAAC TCATTGTTTTCTCTAATTATA 8400

8401 AGTCTACCTTTACTAAGAAG AGATAAAATCATATCAATTG TTAGCTCTCTTTTAAAGAC ATAACAGCAGTACCCCTTAA TTAAAGGGAAATTTACTCA 8500

8501 TGTCAAATAAAGAATAGGAA GACAACTGAATTGGATTGT ATCTCTCAAAATATGTAAT TTGCATGCATGACATAACCA TCTATTTGTCGCGTGGTT 8600

8601 GCCAAGATAATTACATCCAA TTAATAATGCTTCAGATGAT GACGCTTACATTAGTAAC AAAGGCTGTCCACCATGCCA AGTGCCCATGAGCTTATAA 8700

8701 AGATCAGCATTTCAAGAATG TTTCTGTATCTTTATAGCCA CGGAACCTCCAAGAGTAGC TTTGTGTATAAACCCACA AATGTAAGTAAAAAACCT 8800

8801 CTTTAGAGTCAATTTCTTTT GTAACATTTTAGTCTTAGG GTCGTACATACACTAATAA TGAGATCCCATTTATTAGCT GTATGTACAGTTGCACAATC 8900

8901 ACCAATCAAAGTTGAATCTG CATCAGAGACAAAGTCATTA AGATCTGAATCGACAAGCAG CGTACCCGTAGGCAACCACT GTCTTAAACAGCTGTACCT 9000

9001 GGTGCAACTCCTTTATCAGA ACCAGCACCAAAATGTATAA CTCTCATATTATAGGTACA GCTAATGTTAATGTGTTAA ATATTGACACAGTTGAGTAT 9100

9101 ATTTTGCAGACTTCATCAAT ATGCTTTAGGTAATGTTCG ACTATCACCATAATTTTGAA GGTACACTTTTCTAATAGC ATTCTTGCATTTTGTAAAG 9200

9201 ATTAGCATAGCAACACCCG GTTGCCACGCTTGACTAGAT TGTAATTTGGGTAATATGT TTCTACATGCCATCTTAC ACCAAAGCATAAATGAAATT 9300

9301 TCTGTATAGTCAATAGTCAC TTTGACAACCTTAGAACTA CAGATAAATCTTGGGATTTT ATTATTCAACAAATCATC AAGTAATAAATCAATAACAG 9400

9401 AACACACACACTIAGATGAA CCTGTTTGCATCTGTTAT GAAATAGTTTTTAACTGTAC TGCCATAGGAATAAAATCT TCTAATTCAAAAGGTGATTC 9500

9501 CTTAAACAGTTIAGCTAGTC CAATCAGTAGATGTAAACCA CTAACCTGACTATGACTAAA ATCTCCATAAACGATAATGTT CGAAGGCATAGCCTTCTAAT 9600

9601 TTATACCGTCAATGAATTC ATCCATAGCTAATTCTAAGA AATCAATTTCCATTGTACTC CTGGGTTTAAATCTGTAA ATTCTACTCTGAGTAAAGT 9700

9701 AAGTTTCAGGTAATTGTGG ACAACACCATCAACTTTCTT ATAATAATTGAAGTGTGTT TTACGGCTTCTCCAATTAAT GTGACTCCATTAGACTAGC 9800

9801 TTGTTTGGGACCTACAGATG GTTGTAACCTTTAACACTA CCTTCTGTAATAAGAACACC ATTACGGCATTTTCTAATA AGTCTACTTGACCATCAACT 9900

9901 CTACCATCAAAAAGACAGT GAGTGGTGCAAAATCGTTT CAGTTGGTTTCTTGGCTATG TCAGTCATAGAACAAACACC AATAGTAGATATATGTGCTG 10000

10001 GAGCATCTCTTTGTAGTCC CAGATCAGATTTAGCAGC AATGTCCACACCCAAATTA TTAGATTTTCACTCTGGT ACTGGTTTAATGTTGCGCTT 10100

10101 AGCCCAAGCTCAATGCTA CATTAACAGGTAATGTGTT TTAATTTCAACAATTTAC ATCAACACCATCAACTTTTG TGTAACAGTGTATTAAATG 10200

10201 ATAGAACTGGTACTTCACC CTGTGTGCCATCAAGTGTC CCTATTTACAACATTAATAA GCCATTTTCTAAACTCTG AAGTCTGTAAAGTGTTC 10300

10301 AGAGGTATATAAGTATCAAT TGTGTGTAACCCACAAGCT AAAGCCAGCTGAGATCATCA TGTATAAGCATCGAGATAC AATCTGTACTATTAGCATG 10400

10401 ATGTCTACAGACAGACCAC CTAATTGCAACGTGTATA CAGCTAGCAGACTTTAGTGG TACATAATCTATATCTGACA CTACTGTTTCCATGAGAC 10500

10501 TCACATGGACTGTCAGAGTA ATAGAAAAATGGTAATTGTT TAAATTAACAAAAGCACTT TTATCAAAAGCTGGTGTGTG GAATGCATGTTTATTACAT 10600

10601 ACAAACTGCCACCATCAAA CCAGGCAAGTTAAGGTAGA TAGCACTCTAGTGCAAAATC TACAACAATGAATTAGCA GGATATCTATCGACATTGCA 10700

10701 ATTCAAAATAGGCATACAC CATCTGTGAATTGTGAGAA TGTGTGCATAAGAATAGAA TAATCTTCTATTTTATAAG CTTTGTACTACAAGGCTGT 10800

10801 GCATCATAGAACTTCCATT TACATCAGCTTGAGGTACAC ACTTAATAGCTTTAGGGTTA CCAATGTCGTGAAGAACTGG GAATTTGTCTGCTAATAATG 10900

10901 CAGCTTTAACAACCATGTGT TGAACCTTCTACAAGCCGC ATTAATCTTCAGTTATCATC CAATTATAGGATATTCAATA GTCCAGTCAACACGCTTAAC 11000

11001 AAAGCACTCGTGGACAGCTA GACACCTAGTCATGATTGCA TCACAACCTAGCTACATGTC ATTACCATGGACTTGACAA ACAGATCATGGTTGCTTTGT 11100

11101 AGGTACCTGTAAACCCCA TTGTGTAACATCAATCAATA ACGGATTATAGACGTAATCA AATCCAATAGAATGATGCCA ACAGGCATAAGTGTCTGAAG 11200

11201 CAGTGGAAAAGCATGTGGCA CGTCTATCATATAGACAACA GGTGCGCTCAGTCTCTATT TCACAAAATACTTCATAGAT GTCAACTCAAGCCATGTGC 11300

11301 CCATAAGACAATAACGACTC TGTGAGAGAGATTTTAAAGT GTGTCACTTAACATTTGTAC AATCTTTATACGCACTACAT TCCAAGGAAGTCTTTGTAC 11400

11401 ATAAGTGGTATGAGGTGTT AAATGTATCTCCAGCGGTG GTTAGCACTAACTCTGGAA AAATCTGTATTATTAGGTGT ATCAACATAACCTGTAGGTA 11500

11501 CAGCAACTAGGTTAACACCT GTAGAAAAACCTAGCTGTA AGGTAAATTGTTACCAACAG CTCTCTAGTAGCATGACAC CCCTCGACATCGAAGCCAAT 11600

11601 CCATGCAGTCATGTCTTA TAGTCTTCTCGCGGTGATA AACATGTAGGGTAACCAAT AACTGATAATTCATTTTAA AACCCATCATAGAGATGAGT 11700

11701 CTCTATAGGTCATGTCCTT AGGTATGCCAGGTATGTCAA CACATAAACCTTCAGTTTG AATTTAGTGTCACACTGAG GTGTGAGGTGCCTGTGTAG 11800

11801 GATGTAACCCAGTGATTACC TTAATAAATCTTTAAAGAG TCCTGTACATTTTACAGCT GTAAAGTTGCCACATCTCTA CGTGAATTTCAAGACTTGT 11900

11901 AAATGCAACTTGTCTATAA GGTCTCTATCAGACATTATG CAAAGTATGCCTACTTTTGC TCTGGTAATAGCAACATTA ATCTGTTTACATTACAAGAG 12000

12001 TGAGCTGTTTCAAGTGGTTG AGTGAATATGACATAGTCAT ATTCTGAGCCCTGTGATGAA TCAACAGTTTGTGTTGTAG TCCCAAAATCTTTGAGGCTA 12100

12101 CAGCATTCTGTGAATTATAA GGTGAAATAAAGACAGCTTT TCTCCAAGCAGGGTTACGTG TAAGGAATTCTCTTACCACG CCTATTTGTGGCCTGTAAAT 12200

12201 TGCAGATGAAACATCATGCG TGATAACACCCCTTATAAAAC ATTTTAAAGCATTGAGCTGA TTGTCTTTTATGTGCTTTAA GCTTATTATCATAAACCAAA 12300

12301 GCACCTACAGTGTCAACAAT TTCAGCAGGACAACGCCGAC AAGTTCGAGGAACATGTCT GGACCTATAGTTTTTATAAG TCTACACACTGAATTGAAAT 12400

12401 ATTCTGTTCTAGTGTGCC TTAGTTAGCAATGTGCGTGG TGCAGGTAATTGAGCAGGGT CGCCAATGTACACATAGTGC TTAGCACGTAATCTGGCATT 12500

12501 GACAACTCAAAATCATAAT TTGTGGCCATTGAAATTCA TCAAAGACAATAATCTGC TGTGCTCTCAGGCAATGCAT TTACAGTACAAAAGACATAC 12600

12601 TGTCTAATGTGAATTCAC TTGAATTTATCAAAACACT CTACACGAGCAGTGCAGGT ATAATTCTACTACATTATC TATAGGCAAATATTTTAATG 12700

12701 CCTTCTCACATAGTCATCA ACAGCGGCATGAGAGCAAGC TGTATACACTATGCGAGCAG AAGGGTAGTAGAGAGCTAGG CCAATAGCAAAATGACTCTT 12800

12801 ACCAGTACCAGGTGTCCTT GGAGTGTAGAATACTTTTGC ATACCAACCTTTTGATAAAT TGCAACATTGCTAGAAAAT CATCTGAGATATTGAGTGTT 12900

12901 GGGTATAAGCCAGTAATTCT AACATAGTGCTCTTGTGGCA CTAGTGTAGGTGCACCTAAT GGCATTACTGTATGTGATGT CAGCACAAAATAATCACCAG 13000

13001 CATTTAATTGTGAAGTTGTT GTACCTCGGTAACAACAGC ATCACCATAGTCACCTTTT CAAAGGTGTACTCTCTAAT TGTACTTTACTGTTTTAGT 13100

13101 TACACGATAACCAGTAAAGA CATAATTTCCGTTAAGTGGT GGTCTAGGTTTACCAACTTC CCATGAAAGATGTAATTCTC TGTACAGACGCACTTCACGT 13200

13201 ACAGTAGCAATACCATAAGA CAGTTTAAATGTCTCTCAG TAGCTTTGAGCGTTTCTGCT GCAAAAAGCTTGAGTCTTC AGTACAGGTGTAGCTAAAA 13300

13301 TGTAAATCACCAGATTGTGC CAGTCACATGTGCAATTGC ATTAAAGTCAGTAACATTAT CGCTACCAACACATGTATTT TTATATAAACCAAAAACTTG 13400

13401 TCCATTAGCACACAATGGAA AACTAATGGGTGTTTATGT GATTTACAATAATAGTCTAT ACCTCTAAGTAAAGTTGAG TCACATCTGTGACATCAAA 13500

13501 CCTGGAGCATTGCAACATA CGGATTACAGACAAGACTA ATTTATGTGATGTGTATATG ACATGGTCGTAACAGCATTT ACAACATAAGAATGCTCTAC 13600

13601 GTATGCAAGCACCACATCTT AATGAAGTCTGTGAATTGCA AAGAACACAAGCCCCAACAG CCTGTAAGACTGTATGCGGT GTGTACATAGCCTCATAAAA 13700

13701 CTCAGGTTCCTAATACCTTG AAGTGTATCATTAGTAAGC ATAACAGAATACATGTCTAA CATGTGCTCTGTTAACTCAT CATGTAGCTTTCTTATGTAT 13800

13801 TGTAAGTACAAATGAAGAC ATCAGCATACTCTGATTAG GATGTTTAGTAAGTGGGTAA GCATCTATAGCTAAAGACAC GAACCGTTCAATCATAAGTG 13900

13901 TACCATCTGTTTTTACGATA TCATCTACAAAACAGCCGC CCCTAGGATTTCTGATGGAT CTGGGTAAGGAAGGTACACA TAATCATCACCTGTTTAACT 14000

14001 TAGCATTGTATGTGAGAGC AAAATTCTAGAGTCCCTTA GTAAGGTCAGTCTCAGTCCA ACATTTTGCTTCAGACATAA AAACATTGTTTGATAATAA 14100

14101 AGAACTGACTTAAAGTTCTT TATGCTAGCCACTAGACCTT GAGATGCATAAGTCTAATTG AAACACACAACAGCATCGTC AGAGAGTATCATCTTGTAGA 14200

14201 AATGTTTACGCAATATGCG TAAAACTATTACAAAAGTC TGTGTCAACATCTCTATTTT TATAGAGACACTCATAAAGT CTGTGTGTAAATTGCGGAC 14300

14301 ATACTTATCGCAATTTTGT TACCATCAGTAGATAAAAGT GCATTAACATTGCCGTGAC AGCTTGACAAATGTIAAAAA CACTATTAGCATAAGCAGTT 14400

14401 GTGGCATCTCTGATGAGGT TCCACCTGGTTTAAACATATA GTGAACCGCCACACATGACC ATTTCACTCAATACTTGAGC ACACTCATTAGCTAATCTAT 14500

14501 AGAAACGGTGTGACAAGCTA CAACACGTTGTATGTTTGGC AGCAAGAACAAGTGAGGCCA TAATTCTAAGCATGTTAGGC ATGGCTCTATCATCTTAGG 14600

14601 ATAATCCCAACCCATAAGGT GAGGGTTTCTACATCACTA TAAACAGTTTAAACATGTT GTGCCAACCCATAGAAATT TGCTGTGTCCAATTACTACA 14700

14701 GTAGTCTCTCTAGTGGCGC TATTGATTTCATAAATTTT TATGAAACATGTCTATTGGTC ATAGTACTACAGATAGAGAC ACCAGCTACGGTCCGAGCTC 14800

14801 TATTCTTTGCACTAATGGCA TACTTAAAGATTCATTGAGT TATAGTAGGGATGACATTAAC GTTTTGTATATGCGAAAAGT GCATCTGTACTCTCATAACT 14900

14901 CATTGAATCATAATAAAGTC TAGCCTTACCCATTATTATA AATGGAACCAACAGCTGATT GTCTAGGTGTGTGACGATGA CTGCGTTAGCATTAATACAG 15000

15001 CCACCATCGTAAACATCAA GTACTTATCAACAACCTCAA CTACAAATAGTAGTTGCTG ATATCACACATTGTTGGTAG ATTATAACGATAGTAGTCAT 15100

15101 AATCGCTGATAGCAGCATT CCATCCTGAGCAAAGAAGAA GTGTTTAAATTCACAGAAC TTCCTTCCTTAAAGAAACCC TTAGACACAGCAAAGTCATA 15200

15201 GAAGTCTTTGTAAATTAC CGGGTTTGACAGTTTGAAGA GCAACATTGTTAGTAAGTGC AGCTACTGAAAAGCACGTAG TCGGTTTATCTAGTAATAGA 15300

15301 TTACCAGAAGCAGCGTGAT AGCAGGGTCAGCAGCATACA CAAGTAATTCCTTAAAACTA AGTCTAGAGCTATGTAAGTT TACATCCTGATTATGTACAA 15400

15401 CACCTAGCTCTCTGAAGTGG TATCCAGTTGAAACTACAAA TGGAACACCATCAACAAATA TTTTCTCACTAGTGGTCCA AAACCTGTAAGTGGGAACAC 15500

15501 TGTAGAGAATAAAACATTAA AGTTTGCAACAATGCAGAATG CATCTGTATCCAAACAGTT AACACAATTTGGGTGGTATG TCTGATCCCAATATTTAAAA 15600

15601 TAACGGTCAAAGAGTTTAA CCTCTCTCCGTGAAGTCAT ATTTTAAACAATCCCACTTA ATGTAAGGCTTGTGTAAGTC AGTGTCACATGTGACTCTG 15700

15701 CAGTTAAAGCCCTGTGTAAG GTTAATATAGGCATTAACAA TGAATAATAAGAATCTACAA CAGGAATCCACTACCTGGC GTGGTTTGTATGAAATCACC 15800

15801 GAAATCATACCAGTTACCAT TGAGATCTTGATTATCTAAT GTCAGTACCAACAATACC AGCATTTCGATGGCATCAC AGAATTGTAAGTGTTTTAACT 15900

15901 AAAGCTTGGCGTACAGCTTC ACCTAAGTTGGCGTATACGC GTAATATATCTGGGTTTCTT ACAAATCATACCAGTCCTT TTTATTGAAATAATCATCAT 16000

16001 CACAACAATTGTATGTGACA AGTATTTCTTTTAAATGTGC ACAATTACCTTCATCAAAAT GCCTTAAAGCATAGACGAGG TCTGCCATTGTGATTAGT 16100

16101 AAGACGTTGACGTGATATAT GTGGTACCATGTACCCGTCT ATTCTAAACTTAAAGAAGTC ATGTTTAGCAACAGCTGGAC AATCCTTAAGTAAATTATAA 16200

16201 ATTGTTTCTTCTATGTGGTA GTTAGAGAAAGTGTGCTCT TAACACAAAGTAAGAATCA ATTAATTTGTATCTTCTGTC CTTTCTTGGAAAGCGACAAC 16300

16301 AATTAGTTTTTAGGAATTTA GCAAAACCGCTACTTTATC ATTGTAGATGTCAAAGCCC TGTATACGACATCAGTACTA GTGCCTGTGCCGACGGTGT 16400

16401 AAGACGGGCTGCACTTACAC CGCAAACCGTTTAAAAACG ATTGTGCATCAGCTGACTGA AGCATGGGTTCGGGAGTTG ATCACAACACAGCCATAAC 16500

16501 CTTTCCACATACCGCAGACG GTACAGACTGTGTTTTTAAG TGTAAAACCCACAGGGTCAT TAGCACAAAGTTGAGGTATT TGTACATACTTACCTTTTAA 16600

16601 GTCACAAAATCCTTTAGGAT TTGGATGATCATGTGGCAA CGGCAGTACAGACAACACGA TGCACCACCAAGGATTCTT GATCCATATTGGCTTCCGGT 16700

16701 GTAAGTGTATTGCTGACCTG ACCAGTACGTGTGTACACA ACATCTTAACACAATTAGTG ATTGGTTGTCCTTACTAGC TAGATAATCTTTGTAAGCTT 16800

16801 TAGCAGCATCTACAGCAAAA GCACAGAAAGATAATACAGT TGAATTGGCAGGCACCTCTG TTGCATTACAGCTGTGAGA CGTACTGTGGCAGCTAAACT 16900

16901 ACCAAGTACCATACCTCTAT TTAGGTGTGTTAATCCTTTA ATAAAGTATAATACTTCAC TTTAGGACCTTAGGTGTGT CTGTAAACAACTACAAGGT 17000

17001 GGTTCAGTTCTGTATAGAT AGTACCAGTTCATCACTCT TAGGGAATCTAGCCATTTC AAATCCTGTAAATCGGATAA CAGTGCAAGTACAAACCTAC 17100

17101 CTCCCTTTGTGTGTGTAG TAAGTAAACGCAATGTGCATC AGTGCAAGCAGTTGTGTAG TACCGGCAGCACAAAGACATC TGTGTAAGTGAACAGGACT 17200

17201 AAGCTCATTATTCTGTAATT TGACAGCAGAATTGGCCCTT AAAGCTGTACAATAAGAGG CCATGCTAAATTAGGTGAAT TGTCCATACTAATTTACTA 17300

17301 AGTTGAACAATTTTACTATC TGCACTACAACCTGTGGA TTTCCACAATGCTGATGCA TAAGTAAATGTGTACCATC ACAGTATTTTATATGTGT 17400

17401 TATAGTCTGGTATGACAACC ATTAGTTTGGCTGCTGTGT AAGAGGTATTATGTTCAAGG GAACACAACCATCTCTTGCA TTGTTGATAATGTTGTGAG 17500

17501 TGCATCATTATCCAACCTTC TAAGCATAGTGAAAAGCATT GTCTGCATAGCACTAGTAAC TTTTGCCCTCTTGCTCCTCAG ATCTAGCCTGTTTATACATT 17600

17601 TGGGTCATAGCTTGATCAGC CATCTTTTCCAACCTACGTT GCATGGCTGCATCACGGTCA AATTGAGATTAGCCACATT CAAAGACTTCTTCAACCTTT 17700

17701 TAAGAACAACCTCAGAATCA CCATTAGCAACAGCCTGCTC ATAAGCTTCTTGAGCAGTAG CAAAAGCTGCATATGATGGA AGGGAACATAAACTCTGAGGC 17800

17801 TATAGCTTGTAAGGTTGCC TGTTGTCCAGCATTCTTCA CAAAGCTTGTTTATGCTAC AGCACCTGCATGGAAGCA AAACAGAAAGTAGTGA AAC 17900

17901 ATTTTTTCAAAGGCTTCAGT AGTATCTTtagctaagagaa TGTCATGTGTAAGTGGACA CATTGAGCCCACAATTIAGA TAATGATTCTACTCTGAGTT 18000

18001 GTTGCAAACTGAGAGTAAG ACTACTGATGTGCACTTTAC ATCTGACATTITAGACTGTA CAGTGGCTACTTTGATACAA GGTITGCCACCAACACCAA 18100

18101 CAATTAAATGTGAGTTTGA AGGCATCTATGCTATTCTTG GGTGGGAGTAGTCCCTGTGA ATTCATATATCTAACTCCT GTGTAGAACTAAGTAATCA 18200

18201 TAAACACCAAGAGTCAGTCT AAAGTAGCGGTGAGTAAAC AAAAGAGGCCAAAGTAACAA GTACAAAATAGCCTAAGAA ACAATAAACTAGCATTATAC 18300

18301 ACTGAAGTGATTACCAGTT ATGAAGAAAATAGGGCAATA CTCACACACATAAAAAACAA TACCTCTGGCCAAAAACATG ACAGTTGTAAGTACACCTGA 18400

18401 GTAGTTAGAAGTAACAGAGA TTATAAGAGCCCATGCGAA ATGGCTTGATCTAAAGCATT ACCATAATAAACTTTATAAA CGAGTGTCAAGACATTGATA 18500

18501 AGTGTCACACTCTCTAGC ACCATCATCATACACAGTTC TTGCTGTCTAAGGATTAGT AACACTACAGCTGATGCATA CATAACACAGTCTTTAGCT 18600

18601 TAAACACAGACAACTAGTA TCAACCATATCCAACCATGT CATAATACGCATCACCAAC TAGCAGGCATATAGACCATA TTAAATAAGTACAGTGGC 18700

18701 AAGAGAAGGTAAACAAAACA AACAGAGAAATGCATGCTTA TGTTTGACAAACATCATTGC AAAAGCAGACATAGCAATAA TACCCATAGCAAAAGGTAA 18800

18801 AAGGCATTTTTCATACAAAAA AAGAACAAGACCATGAGT TACTCTGGACTAAAACTAAA AGTGAAGTCAAAATTGTGAG TAACAACCAAGTGGTGTGAC 18900

18901 CCTTGATTGTTCTTTTCACT GCATCTTGGAAGTAACACC TGAGCATTGTCTAACACAT CAAAAGGTGTAAATTCATCT TCTAATAAAGCACTACCCAA 19000

19001 TATGGTACGTCCATTCATAC CATTTTGAGTAATCTTTT AATGAAGCACATATCTAA AACGGCAATCCAGTTTGAG CAGAAAGAGGTCTAGTATG 19100

19101 TCAACATGGTCTTGTTAGT AGGTTCAATAATGTACTTCA TAGCCACAAGGTAAAGTCA TTAAGAGTTGTGGTAAATCG ATTGAGAAACCACTGTCTC 19200

19201 CATTTATAACAGCAGCTAC AACCAAGCTAAAACATTAACTGTAATAGTTGTGTCCGTAC CAGCTGCTTGTGCTGTTTGC CTGTACAAAAAGGTCCATA 19300

19301 AAAGTTACCTTCTAAGCTGT GCCAGCATGAAGTCCAGTT GGTAAATCCATATGGTGCAT GTAACAAAAGAGACACAGT CATAATCTATGTTAAACCA 19400

19401 AACTACCACATGAACCAATT AAGGAATGAACCTTAATAG TGAATTTGGGCTCATAGCA CATTGGTAAACACAGATGG TGAACCAATTGTAACAAGCTA 19500

19501 AACTGAAAAAGCTGTCTCT GGTGAATGCGAACAACCTT ATACTAGGTGTCTTAGGAT TGGCTGTATCAACCTTAAGC TTAAGTACACAATTTGCTAT 19600

19601 AGAATGTCAATAACCTGTA GTTGAACATTACAGCTGT ACCAAGAAATATGATTAGA CTTACGAATGAGTAAATCTT CATAATTAGGTAAAGCATG 19700

19701 TCTTCAGAGGTGCAGATCAC ATGCTTGGACAGTAACTA CGTCATCAAGCCAAAGACCG TTAAGTGTAGTTGTACCACA AGTTACTTGTACCATACAAC 19800

19801 CCTCAACTTTACCAGATGGG AATGCCATTTTCTAAACCC ACTCTGCAAAACAGCTGAGG TGATAGAGGTTTGTGGTGGT TGGTAAAGAACATCAGAACC 19900

19901 TGAGTTACTGAAGTCATTGA GAGCCTTTGCGAGATGACAA CAAGCAGCTTCTCTGAGCT AGTTGTATCCATTGCTCCAC TAAATACTTGTACTTATTA 20000

20001 TAAAGAGCTAAGTATCTATT ATATTGCGTAAGAGGTAATA GCACATCACTACGCAACTTT AGATACATTTCTTTATTTAA CAAAAGGTGCACAGCGCAG 20100

20101 CTTCTTCAAAGTACTAAAG GAAACACCATTAAGACTAC ACGTCTCTTAGGTAATTAC TAAAGAACCAATAGAAATGC TTTGTGGAATACAAATGAT 20200

20201 ATAAGCAATTGTATCCAGA AAGGTACTAAAGGTGTGAAC ATAACCATCCACTGAATATG TGCTAAAAAGAAACATCAT TAGTAAGATAAAATGTCAAG 20300

20301 TACAAGTAAATAACAGAATA AACACCAGTAAGAATGAGT AAAGTGGTGTAAACAGAGT ACAGTGAATGACATAAGGAA TAGTAAAGTATTAAGGCAA 20400

20401 CTACATGACTGTATTCACCA AAAGCTCTCTAAACCTCAT AAAATAGTAGGCAAGGCATG TTACTACGATAGCTACAATA CCACCAGTACTATAGATGC 20500

20501 TGATATGTCCAAGACCAAA TAGGTTGAATTAGTGGTGA AACATATTAGTAAGTAAAT TACAGCATCTACACCACAGA AAATCCTGTGTAAGATCTG 20600

20601 TAATAATCATTGTTAAGTAC CCATCTACCACTAGTAGATA CACAAACACCAAGCTTCTGAT CTTTCAAGTCCGCTGCTC ACAGTACTCAGAATCAAAAG 20700

20701 TTGTTACCACTCTAACAGAA CTTCAAGGTAGGTGTAGG AAATGAATAATAGAGCCAT CCATGAGCACATAACGTGTG TCAGGGCGTAAACTTTCATA 20800

20801 AGCAACAGAACCTTCTAGTA CATTGGTATCATAACAATAT GGTACTGGCTTACCAGAAGC ATCTTTAAAAATTGTACATT CAGCAGCCAAAACACAAGCT 20900

20901 GATGTTCAGAAAGTCAGTGA CTCTATAAGTTTGTAGGTG TGTAACAGATGTTACCAACT GCACTAAAACTCTAGGTAA GAAATGCAAAAGTCACCAT 21000

21001 TAGTTGTGCGTAATATCGTG CCAGGCAAAACAGGCACGAC AAAACCACTTCTCTGTGTA TGACTGCAGCAATCAATGGG CAAGCTTTGTCATTAGTATA 21100

21101 ACTACCACCAAGCTGGCTAA ACCATGTGTCAAAATCAGCA TGTTGTGTAGCAAAACAAGT ATCTGTAGATGCTATGTCAC GAGTGACACCACCATCAATA 21200

21201 GCCTTGTATCCTATGATTTC ACTTGAAAAGTCAGTATGTT TAGACATGACATGAACAGGT GTTATTAATAGAAAATAGC AGCAACAAAAGGAACACAA 21300

21301 GTGTAACCTTAATTAAGTCG TTCAACCAATTATTAACAAT TTTACCACCTTAAGTGCTA TCTTTGTGTACAAACATTA ACAACTTGTCTAGTAGTTGC 21400

21401 ACATGTCAACTTAAAGGTA AGTATCTTTTtagcagca CTACGTATTGTTTTCGTAG TTGTTGACACAATGACATGA AATCTTTAAGTTCATATC 21500

21501 AAAGCAATGTGTGACTTTT TGCTACCTGCGCATTAATAT GACGCGCACTACAGTCAATA CAAGCACAAGGTCACGGGG TGTATGTTTCAACTTTGT 21600

21601 TATAGGTGAGCATATAGTTA TTAACTATCGCCAGTAAC TTCTATGTCAGATTGATGTG ACAATTTAAGCAITCAACA ACATCTTTAGTTTCTACATC 21700

21701 TGAATCAACAAACCTTGCC GAGCTGCTGAAATAAAAGTA GATAAGACATGTCTAAGGA CACATTTTGCAGTTCAG CTTCTGCAGTTGCAACTAGT 21800

21801 GTTTTGAGTTTTTCCATTGG TACGTTAAAAGTTGATGAAA ACGTATTAACGTAAGCATCA AACATTTAACTGCACTTC CGCACTATCACAACATCAG 21900

21901 ACACATAAGCCTGATCTAGT AACAGTATAGGTTGACACAT AAGCTGACTGTAGTAAACAG ACGCTGATTTGTCAGATGAT TCTTCACATTTGATTIACC 22000

22001 ATCAAAAACATAACATTA TAGGCAATGAACCTTTAGTG TTATTAGCTCTCAGGTTGTC TAAGTTAACAAAATGAGAGA GAGAATGTCTTTCATAAGTC 22100

22101 TTTTGACAGCTTTATCAAA GTAAAGATGGATGAACCAT TCTTCACTGTAACACTATCA ACGATGAAGAAGACTGGTC AGTAGGATTATTGGTCTTT 22200

22201 TAAACTGTAGTGACAAGTCT CTCGCAACTTCATCACTAAT AAATGTACTACCAGCACAGA ATGTATCACAATTAACACAA TTCAAATTGTGAGTTTGCA 22300

22301 AAAGCCTTTACCTCCATTAG CATAGACATAAAAGGACCTT CTAACACCATTAACAATAGT TGTACATTCGACTCTTGTG CTCTATTACGTTTGAACAC 22400

22401 ATCATACAAGTTGATGAATT ACAACCGTCTACAACATGCA CATAACTTTTCCATACATAA TAAATGATGCAAAAGAAGAT GTACATTCTAACCATAGCTG 22500

22501 AAATCGGGGCCATTGTACA AGATTAATTATTAACCATAT AAGCCAAGAATTACTAATAA AATGACTGCAAAATAGCTG AAAAAACAATTGCATGATTG 22600

22601 AGCCAATCAAGTACATAGA AAAACCTAGTGAAAAGAATA TATGCCAAAACCACTCTGC AACTAAGCCAAAAGCAGTTA AATCCCATTTAAAGATGAA 22700

22701 ATGGTAATTGTATAGTTTC TAAAGAAGGATAGGTGTCTA AAGATCTAAACCACTAAGA CAAACACTACAAGGTATAGA ACCAGTACAGTAGGTTGCAA 22800

22801 TAGTGACATTAGTAGAGTTC AAATAGCCTTCTCTGTAACC AGTACAGTAAGAAGCATGC CTAAATTAGACATTTAAACA CCTAAAGCAGCGTTGAGTA 22900

22901 GATTAAAGAACCTAGGCAAA CACTTAATAGTAAAAACCAA ATTATAATATTTACAGTTT AGAAAAATTAGGTGACTTCA AATAATTAAATGAAGCCTCT 23000

23001 AGACAAAATTACCGACACT CTTAACAGTATTCTTGCTA TAGTAGTCGGCATAGATGCT TTAATCTAGAATTTGTACT TCTAGTAAAAGTACACAATT 23100

23101 GTAGCAATAAAGTAAAGAAA TAAGGCATATAATTAGTACA AACACGGTTTAAACACCGTG TAACTATGTTAGTAGTTGTA CTAACAACCTTTGTAAGAAA 23200

23201 AGGCTTAGCATAATTAGCTA TAGTATCCCAAGGGACACTA TTAACAGCAGCTAAACCATG AGTAGCAAGGGTTTCAAAC CTAATACTCTAGATAATTCA 23300

23301 TTAGGTTTCTTAATAGTAAG ACTAGAATTGTCTACATAAG CAGCCATTAGATCTGTGTGG CCAACCTCTCTGTAATTTT TAAACTATTATTGTCTGGTT 23400

23401 TAAGTATAATGTCTCTACA ACTTCGGTAGTTTTCACATT ACACTCAAGAACGCTTTTCT GTATGGTAGGATTTTCCACT ACTTCTTCAGAGACTGGTTT 23500

23501 TAGATCTTCGAGGCAAGAT TATCCATTCCCTGCGCGTCC TCTGACTTCAGTACATCAAA CGAATTTAGTGTTCAACTG GTTTTGTGCTCCAAGACAA 23600

23601 CGTATACACCAGGTATTGG TTTATACGTGGCTTTATTAG TTGCATTGTTAACATGCCAA ACAATAGGTTTATGTAACAA TTAGCTCCTTTCCTTAAAG 23700

23701 AGGGTGTGTAGTGTTTATA TCAATAGCCACCACATCACC ATTTAAGTCAGGAAAAAATG TAACTTTAAGCTCTCTTGAA GCAGGTTTCTTATAACCAGT 23800

23801 TAACTGGTTTAAATCATCAG CAAATTTGATATTATACAT ACAACTTAAATATATCGAA GCTTGC GTTTGGATATGGTT GGTTTGGTACAAGATCAATT 23900

23901 GGTGTGCTGTGAAATAAGA ATTGCTTTCTTATAATAAT TGCCAACTTAGGGTCAATT TCTGTACAAACAACCAATC CAATTTATAAGTAACCTGGT 24000

24001 TTATGGTTGTGTGTAAC TG TTTTCTTTGTAGAAAACATC CGTAATAGGACCTTTGTATT CTGAGGACTTTGTAAGTAAA GCACCGTCTATGCAATACAA 24100

24101 AGTTTCTTTAGAAGTTATAT GTTTATAGTGACCACACTGG TAATTACCAGTGTACTCACT AGCACAAGTAAATGTACCAT GCTTAAGTTCATACTGAGCA 24200

24201 GGTGGTGTGACATCATAAC AAAAGGTGACTCTGTGTGA CTAGATATTTGTAGCTTGT TTACCACAGTACAAGGTAT CTGAACACCTTTCTTAAATT 24300

24301 GTTCATAAAGAAAGTGTGCC ATGTACATAACAGCTTCTAC ACCCTTAAGGGTGTCTGTCT GTTGCCACAAGTTTACAC ACCACGTTCAAGACTCTTTT 24400

24401 GCAAGAATCTAAATGGCAT GTTGAACAAGTAACCTAATT GTTTCTCTAACATCACCTAA CTCACCTACTGCTTATTAC AGTAGGCTAAGATAAGTGCA 24500

24501 CAAAAGTTAGCAGCTTACC AGCCCTTGCTCTGTAATAAG CATCTGTAGAGCAGGTGGA TTAACCTCAACTCTATTG TTGGAGTGTTAACAATGCAG 24600

24601 TGGCAAGATAACAGTTGTTA TCTGCCCATTTAATAGAAGT TAAACCATAACTGTGGGT ATTTCCACTTTTTAGTGTA TTAATAGTGACATGTACCT 24700

24701 ACCCAGAAAAGTAGGATCAG TTGTGTGGTAGTACTCAAAA GCCTCAACACGTAGAGTGTG ATCATTAGGTAAAACATAAA ATGTTTACCTTCATGTGAA 24800

24801 TTATGAGGTTTATTTTAGT AACATCAGCTCCATCCAAT AAGTTGGACCAAACTGTTGT CCATATGTCATTGACATGTC CACAACCTGCGTGTGGAGGT 24900

24901 TAATGTTGTCTACTGTGTGA AACACCTTAATAGTCTCTAC TTCTCTCAAGAAAGAAGTG TCTTAAGATTGTCAAAGGTG ATAACCTCACCATCTAGGTG 25000

25001 GAATGTGGTAGGATTACTAG TGTAATATACACTTTTATCA CCTCTCTTAAGAAATCTAT ACCTAGTTGTGTAGATTGTC CAGAATAGGACCAATCTTTA 25100

25101 TAGGAACCAGCAAGTGAGAT GGTTCATAAAAATGTTCTT CAGGTGTTTGTAGAAGAAGAA GTAAGATAACCAATTATACGC TGTAACAGCATCAGGTGAAG 25200

25201 AAACAGAAAAGTAGTGGC ACTTTGAGAGATCTCATATA CCGAGCAGCTTCTTCCAAAT TTAAGCCATGTGTTACATAG CCAAGTGGCATTGTAACAAG 25300

25301 AGTTTCATTAGATCGTTAA GTGTGTGTGATAAGTGACGCT ACAGTTGTTTACTGGTGTA AAAGTAAAATAGCAACCAT AATCAACCACACCTCTTGT 25400

25401 ATTTAATACCCCTTATATTT ACGCTGTATAGTGAAACTA TGGCTTAGTTTCCACACAG ACAGGCATTAATTTGCGTGT TTCTCTGCATGTGCAAGCA 25500

25501 TTCTCGCAAATTCCAAGAA ACAGTTCCAAGAATTCTTG CTCTCTCATTAGAGATAATAG ATGGTAGAATGTAAAAGGCA CTTTACACTTTTAAAGCAC 25600

25601 TGTCTTTGCTCTCTACAG TGTAACCAATTTAAACCTGA CCCGGTAAGTGGTTATATA ATTGTCTGTGGCACTTTT TCAAAGCTTTGCTAGCATT 25700

25701 TCAGTAGTGCCACGACCTT TTAGTAGGTATAACACAG CAGTTAAACACCCCTCTGA ACAACATCACCCACTATATA TGGAGCATCTTCTTTAAGA 25800

25801 AAGTGATGCAATGTCTACTA ACAAGAGTGGCAGAACTGG ATGAAGATTGCCATTAATGT CAATATAAAGTAACAAGTTT TCTGTGAGGAACTAGTTTC 25900

25901 TTCCAGAGTTGTGTAACTT CTTCACACAAGCTTTGATT TTCTATCATCTGTGTTTCT CTGTCAACTGAAGGTTTAC TTTAGTTATAAATGGCTTA 26000

26001 ACTTCTCTTTAGGAATCTC AGCGATCTTTGTTCACATT GCTTTTCACTCTTCAATTCC AAAAAAGCTTGAAACAAGTT GTCATAGAGATTTTATCAA 26100

26101 AGACAGCTAAGTAGACATTT GTGCGAACAGTATCTACACA AACTCTTAAAGATGTATAG GTTCAGCACCAAAAATACCA GCTGATAATAATGGTCAAG 26200

26201 TAGAACTTCGTGCTGATTAA AATTTTCATAAGCACTCTTA AGAAGTTGAATGTCTTACC TTTGTAAACATTTGGGCCGA CAACATGAAGACAGTGTTA 26300

26301 GCAAGATTGTGTCGCTTAA AACACAACCTACCACCACTT TAAGTGTGCCATTAGTAGCT ATGTAATCATCAGATTCAAC TTGCATGGCAATTGTTAGTAG 26400

26401 CCTTATTAAAGGCTCTGCA ACACCTCTCCATGTTAAG GTAAACATTGGCTGCATTAA CAACCACTGTGTTTTACC TTTTAGCTTCTTCCACAAT 26500

26501 GTCTGATTTTAAATGATA CATGTGTCAGTAAGTTTAAA TAACCACTAAACATTTTAC TTCAATAGTCTGAACAAC TGTAAGTTCCATCTCTAAT 26600

26601 TGAGGTTGAACCTCAACAAT TGTTGAATAGTAGTTGTCT GATTGTCTCTACTGCTGTCT TGTGACCAACAGTTTGTG ACTATCATCATCTAACCAAT 26700

26701 CTCTCTCTGTCTCTTCTCA GGTGAAGAGCAGCAGAAGT GGCACCAAAATCCAAAGGTT TACCTTGGTAATCATCTTCA GTACCATACTCATATTGAGT 26800

26801 TGATGGCTCAAACTTCTCT CTTCACAATCACCCTTCTCT TCATCTCATCTGGAGGGTA AAAAGAACAAATACATATGT AAGCAAATTTAACTACCA 26900

26901 GACTCATCAATAAGTAGTA TGTAGCCATACTCCACTCAT CTAATCAATGCCAGTGGT GTAAGTAATTCAGATACTGG TTGCAAAGTTTTTATGACAG 27000

27001 CATCTGCCACAACACAGGCG AACTCAATTACTTCTGTACC GAGTCAACTGTATAGGCAG AGCACTTCTCATTAAGTACT TTATCAATCCTTTCATCAAG 27100

27101 TTCAAAAGTGATATTCACAC TCTGTAACTTGCACTTCT ATCACAGTGTATCACCAAA AGTAACCTTGTGGTGCAC CGCCTTTGAGTGTGAAGGTA 27200

27201 TTGTTTGTACCATCATATT AGGTGCAAGGGCACAGTACT TTTCTGTGCTTTGATTTCG AGCAACATAAGCCGTTAAT ACAAAGTGGTGACCAACCA 27300

27301 ATGGAGCTTCAACAGCTTCA CTAGTAGGTGTCTAATG TGTAATCACCAGTTTCA AGACAACCTCTCTGTAAAC ACTTCTGTGGGAAGTGTTC 27400

27401 TCCCTCTAAGAAGATAATTT CTTTGGGGCTTTAGAGGC ATGAGTAGGCCAGTTTCTTC TCTGGATTAAACACACTTTC TGTACAATCCCTTTGAGTGC 27500

27501 GTGACAAATGTTTACCTAA ATTCAAGGCTTTAAGTTTAT CTCCACCAATAATGATAGAG TCAGCACACAAGCCAAAAA TTTATTACAAGCTTAAAGA 27600

27601 ATGTCTGAACACTCTCTCTA ATTTCTTTGACAGGTGAC AATTGTCCACCGACAATT CACAAGCACAGGTGTAGATA AATTAAACAATTTCCCAACC 27700

27701 GTCTCTAAGAACTCTACAC CTTCCTTAAACTTCTCTTCA AGCCAATCAAGGACGGGTT GAGTTTTTCATAACAGTGC CAAAGATGTTAGTTAGCCAC 27800

27801 TGCGAAGTCAACTGAACAAC ACCACCTGTAATGTAGGCCA TTACAAGTAGATTGTTAGTA GCCAAATCAGATGTGAACAT CATAGCATCAATGAGTCTCA 27900

27901 GTGAATAGTGTAAATTTCA TCTAGTATTGTATAGCGGC CTCTGTGTAACACGCACAG AATTTGAGCAGTTTCAAGA GTGCGGGAGAAAATTGATCG 28000

28001 TACAACACGAGCAGCCTCTG ATGCAAATGCATAAAGAGGA CTCAGTATTGATTCTGTTC ACCAATATTCCAGGCACCTT TTTAGCTTTTCTCTTTGTA 28100

28101 ACTTTAAATTAACACAGGA TTCAACAATTTGTTGAATG CTTTATAATCCAAACCTTTA ACAGTTTCCACAAAAGCACT TGTGGAAGCAGAAAAAGATG 28200

28201 CCAAAATAATGGCATCTCT TCATTAAGTTTAAAGTCACC AACAAATATGATGTGACTT TCTCTTTTGGAGTATTICA AGAAGGTTGTCATTAAAGACC 28300

---

28301 TTCGGAACCTTCTCCAACAA CACCTGTATGGTTACAACCT ATGTTAGCGCTAGCACGTGG AACCCAATAGGCACACTTGT TATGGCAACCAACATAAGAG 28400

28401 AACACACAGCCTCCAAGGC AATAGTGCACCACCTTAC GAAGAATGGTTTTCAAGCCA GATTCAATTAGGTATTCGGC AAGACTATGCTCAGGTCCTA 28500

28501 CTTCTGAATTGTAACATGCT GGACAATAAATTTTAACAAC AGCATTTTGGGGTAAGTAAC CACAAGTAGTGGACCTTCT TTAGTCAAATTCAGTGCC 28600

28601 ACAAAATTCGCAAGTGGCTT TAACAAAATGCCCGTCTGC CATGAAGTTTCACCACAATG ATCACACTTCATGAGAGTTG AAAGGCACATTGGTTGCAT 28700

28701 TCATTGGGTACGCAACTGG ATAGACAGATCGAATTCAC CCATAAGCCATCAAGCTTT TTCTTTTCAACCCTTGGTTG AATAGCTTGATTATGGAAT 28800

28801 TTAAGGGAATACAAAATTT GGACATTCCCATTTGAAGAT GTCAAATTTCTTGCCAATT TAATTTCAAAAGGTGTCTGC AATTCATAGCTCTTTTACA 28900

28901 ACGTCCGTGTACCAAGCAA TTTCATGCTCATGTTACGG CAGCAGTATACACCCCTCTT AGTGTCATAAAAGTCCAGTT GTTCGGACAAAGTGCATGAA 29000

29001 GCTTTACCAGCACGTGCTAG AAGGTCTTTAATGCACTCAA GAGGGTAGCCATCAGGGCCA CAGAAGTTGTTATCGACATA GCGAGTGTATGCCCTCCGT 29100

29101 TAAGCTCACGTCATGAGTTCA CGGTAACACCACTGCTATG TTAGTTGTTCCAGTTTTCTT GAAAATCTTCATAAGGATCA GTGCCAAGCTCGTCGCCTAA 29200

29201 GTCAAATGACTTTAGATCGG CGCCGTAACATATGGCCACCA GCTCCTTTATTACCGTTCTT ACGAAGAAGAACCTTGCGGT AAGCCACTGGTATTTGCCC 29300

29301 ACATGAGGGACAAGGACACC AAGTGTCTCACCACTACGAC CGTACTGAATGCTTCGAGT TCTGCTACCAGCTCAACCAT AACATGACCATGAGGTGCAG 29400

29401 TTCGAGCATCCGAACGTTTG ATGAACACATAGGGCTGTTC AAGTTGAGGCAAAACGCCCTT TTCAACTTCTACTAAGCCA CAAGTGCCATCTTTAAGATG 29500

29501 TTGACGTGCCTCTGATAAGA CCTCTCCACGGAGTCTCCA AAGCCACGTACGAGCAGCTC GCGAACCTGTAAACAGGCA AACTGAGTTGGACGTGTGTT 29600

29601 TTCTCGTTGAACACAGGAC AAGGCTCTCCATCTTACCTT TCGGTACACCCCGACAAAA CCTAGATGTGCTGATGATCG GCTGCAACACGGACGAAACC 29700

29701 GTAAGCAGCTGCAGAAGAT AGACGAGTTACTCGTGCTCT GTCAACGACAGTAATTAGTT ATTAATTATACTGCGTGAGT GCACTAAGCATGCAGCCGAG 29800

29801 TGACAGCCACACAGATTTTA AAGTTCGTTTAGAAGACAGA TCTACAAGAGATCGAAAGTT GGTGTTTATACCTTCCCA GGTAAACAAACCAACCACTT 29900

29901 TCGATCTCTGTAGATCTGT TCTCT 29925

### 1.14. SRR12596175 Discovered Strain 1 Nucleotide Sequence

1 AGAAGACAGATCTACAAGAG ATCGAAAGTTGGTTGGTTTG TTACCTGGGAAGGTATAAAC CAACCAACTTTCGATCTCTT GTAGATCTGTTCTTAAACG 100

101 AACTTTAAAATCTGTGTGGC TGTCACTCGCTGCATGCTT AGTGCACTACGCAGTATAA TTAATACTAATTACTGTCG TTGACAGGACACGAGTAACT 200

201 CGTCTATCTTCTGCAGCGTG CTTACGGTTTCGTCCGTGTT GCACGGCATCATGCACAT CTAGGTTTTGTCCGGTGTG ACCGAAAGTTAAGATGGAGA 300

301 GCCTTGTCCCTGGTTTCAAC GAGAAAACACACGTCCAAC T CAGTTGCTGTTTACAGG TTCGCGACGTGCTGTACGT GGCTTTGAGACTCCGTGGA 400

401 GGAGGTCTTATCAGAGGCAC GTCAACATCTTAAAGATGGC ACTTGCGCTTAGTAGAAGT TGAAAAAGGCGTTTGCCTC AACTTGAACAGCCCTATGTG 500

501 TTCATCAACGTTTCGGATGC TCGAACTGCACCTCATGCTC ATGTTAGTTGTTAGCTGGTA GCAGAACTCGAAGGCAITCA GTACGGTCGTAGTGGTGAGA 600

601 CACTTGGTGTCTTGTCCCT CATGTGGGCGAAATACCAGT GGCTTACCGCAAGGTCTTC TTCGTAAGAACGGTAATAAA GGAGCTGGTGGCCATAGTTA 700

701 CGGCGCCGATCTAAAGTCAT TTGACTTAGGCGACGAGCTT GGCCTGATCCTTATGAAGA TTTTCAAGAAAACCTGGAACA CTAACATAGCAGTGGTGT 800

801 ACCCGTGAACCTATGCGTGA GCTTAACGGAGGGGCATACA CTCGCTATGTCGATAACAAC TTCTGTGGCCCTGATGGCTA CCCTCTTGAGTGCATTAAAG 900

901 ACCTTCTAGCAGTGTCTGGT AAAGCTTATGCACTTTGTC CGAACAACCTGGACTTTATTG ACTATAAGAGGGGTGTATAC TGCTGCCGTGAACATGAGCA 1000

1001 TGAAATTGCTTGGTACAGG AACGTTCTGAAAAGAGCTAT GAATTGCAGACACCTTTTGA AATTAATTTGGCAAAGAAAT TTGACATCTTCAATGGGGAA 1100

1101 TGTCAAAATTTGTATTTCCT CTTAAATTCATAATCAAGA CTATTCAACCAAGGGTTGAA AAGAAAAAGCTTGATGGCTT TATGGGTAGAATTGATCTG 1200

1201 TCTATCCAGTTGCGTCACCA AATGAATGCAACCAATGTG CCTTCAACTCTCATGAAGT GTGATCATTGTGGTGAACT TCATGGCAGACGGGCGATTT 1300

1301 TGTTAAAGCCACTTGCGAAT TTTGTGGCACTGAGAATTG ACTAAAGAAGGTGCCACTAC TTGTGGTTACTTACCCCAA ATGCTGTTGTTAAATTTAT 1400

1401 TGTCACGATGTCACAATTC AGAAGTAGGACCTGAGCATA GTCTTGCCGAATACCATAAT GAATCTGGCTTGAAAACCAT TCTTCGTAAGGGTGGTCGCA 1500

1501 CTATTGCCTTTGGAGGCTGT GTGTCTCTTATGTGGTTG CCATAACAAGTGTGCCTATT GGGTTCACGTGTAGCGCT AACATAGGTTGTAACCATAC 1600

1601 AGGTGTGTGTTGAGAAGGTT CCGAAGGTCTTAATGACAAC CTCTTGAAATACTCCAACA AGAGAAAGTCAACATCAATA TTGTTGGTGACTTTAAACTT 1700

1701 AATGAAGAGATCGCCATTAT TTTGGCATCTTTTCTGCTT CCACAAGTGCTTTGTGGAA ACTGTGAAAGGTTTGATTAA TAAAGCATTCAAACAAATTG 1800

1801 TTGAATCCTGTGGTAATTTT AAAGTTACAAAAGGAAAGC TAAAAAAGGTGCTCGGAATA TTGGTGAACAGAAATCAATA CTGAGTCTCTTTATGCATT 1900

1901 TGCATCAGAGGCTGCTCGTG TTGACAGTCATTTTCTCC CGCACTCTTGAAACTGTCTCA AAATTCGTGCGTGTTTAC AGAAGGCCGTATAACAATA 2000

2001 CTAGATGGAATTCACAGTA TTCACTGAGACTCAATTGATG CTATGATGTCACATCTGAT TTGGTACTAACAATCTAGT TGTAATGGCCTACATTACAG 2100

2101 GTGGTGTGTTTCAGTTGACT TCGCAGTGCGTAACTAACAT CTTTGGCACTGTTTATGAAA AACTCAAAACCGTCTTGAT TGGCTTGAAGAGAAGTTAA 2200

2201 GGAAGGTGTAGAGTTCTTA GAGACGGTTGGGAAATTGTT AAATTTATCTCAACCTGTGC TTGTGAAATTTGCGTGGAC AAATGTCACTGTGCAAAAG 2300

2301 GAAATTAAGGAGAGTGTTC A GACATTTTAAAGCTGTAA ATAAATTTTGGCTTTGTGT GCTGACTCTATCATTATTGG TGGAGCTAAACTTAAAGCCT 2400

2401 TGAATTTAGGTGAACATTT GTACAGCACTCAAAGGATT GTACAGAAAGTGTGTTAAAT CCAGAGAAGAACTGGCCTA CTCATGCCTCTAAAAGCCCC 2500

2501 AAAAGAAATATCTTCTTAG AGGGAGAAACACTTCCACA GAAGTGTTAACAGAGGAAGT TGTCTTGAAAACCTGGTGATT TACAACCATTAGAACAACCT 2600

2601 ACTAGTGAAGCTGTGAAGC TCCATTGGTTGGTACACCAG TTTGTATTAACGGGCTTATG TTGCTCGAAATCAAGACAC AGAAAAGTACTGTGCCCTTG 2700

2701 CACCTAATATGATGTTAACA AACAATACCTTCACACTCAA AGGCGGTGCACCAACAAAGG TTACTTTTGGTGATGACACT GTGATAGAAGTGAAGGTTA 2800

2801 CAAGAGTGTGAATACACTT TTGAACCTGATGAAAGGATT GATAAGTACTTAATAGAGAA GTGCTCTGCCTATACAGTTG AACTCGGTACAGAAGTAAAT 2900

2901 GAGTTCGCCCTGTGTTGGC AGATGCTGTCAATAAAAGTT TGCAACCAATATCTGAATTA CTTACACCACTGGGCATTGA TTTAGATGAGTGGAGTATGG 3000

3001 CTACATACTACTTATTGAT GAGTCTGGTGAGTTAAAT GGCTTCACATATGTATTGTT CTTTTACCTCCAGATGAG GATGAAGAAGAAGGTGATTG 3100

3101 TGAAGAAGAAGAGTTTGAGC CATCAACTAATATGATAT GGTACTGAAGATGATTACCA AGGTAAACCTTTGGAATTTG GTGCCACTTCTGCTCTCTT 3200

3201 CAACCTGAAGAAGACGAAGA AGAAGATTGGTTAGATGATG ATAGTCAACAACTGTTGGT CAACAAGACGGCAGTGAGGA CAATCAGACAACTACTATT 3300

3301 AAACAATTGTTGAGGTTCAA CCTCAATTAGAGATGGAAC TACACCAGTTGTTCAGACTA TTGAAGTGAATAGTTTATG TGGTATTTAAACTTACTGA 3400



---

3401 CAATGTATACATTAATAAATG CAGACATTGTGGAAGAAGCT AAAAAGGTAACCAACAGT GGTGTTAATGCAGCCAATG TTTACCTTAAACATGGAGGA 3500

3501 GGTGTTGCAGGAGCCTTAAA TAAGGCTACTAACAATGCCA TGCAAGTTGAATCTGATGAT TACATAGCTACTAATGGACC ACTTAAAGTGGGTGGTAGTT 3600

3601 GTGTTTTAAGCGGACACAAT CTTGCTAAACACTGTCTCA TGTGTGCGGCCAAATGTTA ACAAAGGTGAAGACATTCAA CTCTTAAGAGTGCTTATGA 3700

3701 AAATTTTAAATCAGCAGGAAG TTCTACTTGCACCATTTATA TCAGCTGGTATTTTGGTGC TGACCCTATACATTCTTTAA GAGTTTGTGATAGTACTGTT 3800

3801 CGCACAAATGCTACTIAGC TGTCTTTGATAAAAATCTCT ATGACAAACTTGTTCGAAGC TTTTGGAAATGAAGAGTGA AAAGCAAGTGAACAAAAGA 3900

3901 TCGCTGAGATTCTCTAAAGAG GAAGTTAAGCCATTTATAAC TGAAAGTAAACCTTCAGTTG AACAGAGAAAACAAGATGAT AAGAAAATCAAAGCTTGTG 4000

4001 TGAAGAAGTTACACAACCTC TGGAAGAACTAAGTTCCTC ACAGAAAACCTGTACTTTA TATTGACATTAATGGCAATC TTCATCCAGATTCTGCCACT 4100

4101 CTTGTGATGACATTGACAT CACTTTCCTAAAGAAAGATG CTCATATATATGTTGGTGAT GTTGTTCAGAGGGTGTITT AACTGCTGTGGTTATACCTA 4200

4201 CTAAAAAGGCTGTGTGCACT ACTGAAATGCTAGCGAAAGC TTTGAGAAAAGTGCCAAACAG ACAATTATATAACCACTTAC CCGGTGTCAGGGTTTAAATGG 4300

4301 TTACTCTGATAGGAGGCCAA AGACAGTGCTTAAAAAGTGT AAAAGTGCCCTTTTACATTCT ACCATCTATTATCTCTAATG AGAAGCAAGAAATCTTGA 4400

4401 ACTGTTTCTTGGAAATTCGCG AGAAATGCTTGACATGCAG AAGAAACACGCCAAATTAATG CCTGTCTGTGTGGAAACTAA AGCCATAGTTTCAACTATAC 4500

4501 AGCGTAAATATAAGGGTATT AAAATACAAGAGGGTGTGGT TGATTATGGTGCTAGATTTT ACTTTTACACCAAGTAAACA ACTGTAGCGTCACTTATCAA 4600

4601 CACACTTAACGATCTAAATG AAATCTTGTGTACAATGCCA CTGGCTATGTAACACATGG CTAAATTGGAAGAAGCTG CTCGGTATATGAGATCTCTC 4700

4701 AAAGTGCCAGCTACAGTTTC TGTTCTTTCACCTGATGCTG TTACAGCGTATAATGGTTAT CTTACTTCTTCTTCTAAAC ACCTGAAGAACATTTTATTG 4800

4801 AAACCATCTCACTTGTCTGGT TCCTATAAAGATTGGTCCTA TTCTGGACAATCTACACAAC TAGGTATAGAATTTCTTAAG AGAGGTGATAAAAGTGATA 4900

4901 TTACTACTAGTAATCCTACCA CATTCACCTAGATGGTGAA GTTATCACCTTTGACAATCT TAAGACACTTCTTCTTTGA GAGAAGTGAGGACTATTAAG 5000

5001 GTGTTTACAACAGTAGACAA CATTAACTCCACACGCAAG TTGTGGACATGTCAATGACA TATGACAACAGTTTGGTCC AACTATTTGGATGGAGCTG 5100

5101 ATGTTACTAAAAATAAACCT CATAATTCACATGAAGGTAA AACATTTTATGTTTACCTA ATGATGACACTCTACGTGT GAGGCTTTTGAGTACTACCA 5200

5201 CACAACATGATCTAGTTTTC TGGGTAGGTACATGTCAGCA TTAATCACACTAAAAAGTG GAAATACCCACAAGTTAATG GTTTAACTTCTATTAAATGG 5300

5301 CGAGATAACAACCTGTTATCT TGCCACTGCATTGTTAACAC TCCAACAATAGAGTTGAAG TTTAATCCACTGCTCTACA AGATGCTTATTACAGAGCAA 5400

5401 GGGCTGTTGAAGCTGCTAAC TTTGTGCCTTATCTTAGC CTACTGTAATAAGACAGTAG GTGAGTTAGGTGATGTTAGA GAAACAATGAGTTACTTGT 5500

5501 TCAACATGCCAATTAGATT CTTGCAAAGAGCTTGAAC GTGGTGTGTAAAACTTGTGG ACAACAGCAGACAACCTTA AGGGTGTAAGAGCTGTTATG 5600

5601 TACATGGGCATACTTCTTAA TGAACAATTTAAGAAAGGTG TTCAGATACCTTGTACGTGT GGTAAACAAGCTACAAAATA TCTAGTACAACAGGAGTCAC 5700

5701 CTTTGTGTTATGATGCAGCA CCACCTGCTCAGTATGAAGT TAAGCATGGTCAATTIACCT GTGCTAGTGAGTACACTGGT AATTACCAGTGTGGTCACTA 5800

5801 TAAACATATAACTTCTAAG AAATCTTGTATTGCATAGAC GGTGCTTACTTACAAAGTC CTCAGAATCAAAGGTCCTA TTACGGATGTTTTCTACAAA 5900

5901 GAAAACAGTTTACACAACAAC CATAAACCCAGTTACTTATA AATTGGATGGTGTGTTTGT ACAGAAATTGACCCTAAGTT GGACAATTATTATAAGAAAG 6000

6001 ACAATTTCTATTTCACAGAG CAACCAATTGATCTGTGACC AAACCAACCATATCCAAACG CAAGCTTCGATAATTTTAAG TTTGATGTGATAATATCAA 6100

6101 ATTTGCTGATGATTAAACC AGTIAACTGGTTATAAGAAA CTGCTTCAAGAGAGCTTAA AGTTACATTTTCCCTGACT TAAATGGTGATGTGGTGCT 6200

6201 ATTGATTATAAACACTACAC ACCCTCTTTTAAGAAAGGAG CTAATGTGTACATAAACCT ATTGTTGGCATGTTAACAA TGCAACTAATAAAGCCACGT 6300

6301 ATAAACCAATACCTGGTGT ATACGTGTGCTTTGGAGCAC AAAACCAAGTGAACATCAA ATTCGTTTGATGTACTGAAG TCAGAGGACGCGCAGGGAAT 6400

6401 GGATAATCTTGCTGCGAAG ATCTAAACCAAGTCTCTGAA GAAGTAGTGGAAAATCCTAC CATAAGAAAGACGTTCTTG AGTGTATGTGAAAACCTACC 6500

6501 GAAGTTGTAGGAGACATTAT ACTTAAACCAAGCAATAATA GTTTAAAAATTACAGAAGAG GTTGCCACACAGATCTAAT GGCTGCTTATGTAGACAATT 6600

6601 CTAGTCTTACTATTAAAGAAA CCTAATGAATTATCTAGAGT ATTAGGTTTGAAAACCTTG CTACTCATGGTTAGTGTCT GTTAATAGTGTCCCTTGGA 6700

6701 TACTATAGCTAATTATGCTA AGCCTTTTCTTAAACAAAGT TGTAGTACAACACTACTAACA TAGTTACACGGTGTTTAAAC CGTGTGTGACTAATTATAT 6800

6801 GCCTTATTTCTTACTTTAT TGCTACAATAGTGACTTTT ACTAGAAGTACAAATCTAG AATTAAAGCATCTATGCCGA CTACTATAGCAAGAATACT 6900

6901 GTTAAGAGGTGTCGGTAAATT TTGCTAGAGGCTCGATTTA ATTATTGAAGTCACCTAAT TTTCTAAACTGATAAATAT TATAATTGTTGTTTTACTAT 7000

7001 TAAGTGTGTCCTAGGTTCT TTAATCTACTCAACCGCTGC TTAGTAGTTTAAATGTCTA ATTTAGGCATGCCCTTCTAC TGTACTGGTACAGAGAAGG 7100

7101 CTATTTGAACCTACTAATG TCACTATTGCAACTTACTGT ACTGGTCTATACCTTGTAG TGTGTTGCTATGTGGTTAG ATTCTTACAGACTAACACT 7200

7201 TCTTTAGAACTATACAAAT TACCATTCTCATTTTAAAT GGGATTAACTGCTTTTGGC TTAGTTGACAGAGTGGTTTT GGCATATATCTTTTCACTA 7300

7301 GGTTTTTCTATGACTTGA TGGCTGCAATCATGCAATT GTTTTCAGTCTCTTTCAG TACATTTATTAGTAATCT TGGCTTATGTGGTTAATAAT 7400

7401 TAATCTGTGCAAAATGGCCC CGATTTACAGTATGGTTAGA ATGATACATCTTCTTGCATC ATTTTATTATGTATGAAAA GTTATGTGATGTTGTAGAC 7500

7501 GGTGTGTAATCAATCAACTG TATGATGTGTACAAACCGTA ATAGAGCAACAAGAGTCGAA TGTACAACATTTGTTAATGG TGTAGAAGGTCCTTTTATG 7600

7601 TCTATGCTAATGGAGATAA GGCTTTTGCAAACTACACAA TTGGAATTGTGTTAATTGTG ATACATCTGTGCTGGTAGT ACATTTATTAGTATGAAGT 7700

7701 TGCAGAGACTGTGCTACTAC GTTTTAAAGACCAATAAAT CTAAGTACAAGTCTTCTTA CATCGTTGATAGTTACAG TGAAGAATGGTTCCATCCAT 7800

7801 CTTTACTTTGATAAGCTGG TCAAAAGACTTATGAAAGAC ATTCTCTCTCATTTTGTG AACTTAGACAACCTGAGAGC TAATAACACTAAAGGTTCTA 7900

7901 TGCCTTAATGTATTAGTT TTTGATGGTAATCAAAATG TGAAGAATCATCTGCAAAAT CAGCGTCTGTTTACTACAGT CAGCTTATGTGTCAACCTAT 8000

8001 ATAGTTACTAGATCAGGCAT TAGTGCTGTATGTTGGTGAT AGTGCAGGAAGTGCAGTTAA AATGTTGATGCTTACGTTA ATACGTTTTCATCAACTTTT 8100

8101 AACGTACCAATAGAAAACT CAAAACACTAGTTGCAACTG CAGAAGCTGAACCTGCAAG AATGTGCTCTAGACAATGT CTATCTATGTTTATTTTCA 8200

8201 CAGCTCGGCAAGGGTTTGT GATTAGATGTAGAAACTAA AGATGTTGTGTAATGTCTTA AATTGCTACATCAATCTGAC ATAGAAGTACTGGCGATAG 8300

8301 TTGTAATAACTATATGCTCA CCTATAACAAGTTGAAAC ATGACACCCCGTGACCTTGG TGCTGTTTGTGACTGTAGTG CGCGTCATATTATGCGCAG 8400

8401 GTAGCAAAAAGTCACAACAT TGCTTTGATATGGAACGTTA AAGATTTTCAATTCATTGCT GAACAACACGAAAACAAT ACGTAGTGTGCTGCTAAAA 8500

8501 ATAACCTTACCTTTTAAAGTTG ACATGTGCAACTACTAGACA AGTTGTTAATGTGTGAAATA CAAAGATAGCACTTAAGGGT GGTAATAATTGTTAATAATTG 8600

8601 GTTGAAGCAGTTAATAAAG TTACACTGTGTCTTTTTT GTGTGCTGCTATTTTCTATT AATAAATCTGTGTATGTCA TGTCTAAACACTACTGACTT 8700

8701 TCAAGTGAATCATAGGATA CAAGCTATTGATGGTGGTG TCACTCGTGACATAGCATCT ACAGATACTAGTTTGTCTAA CAAACATGCTGATTTTGACA 8800

8801 CATGTTTAGCCAGCGTGGT GGTAGTTATACTAATGACAA AGCTTGCCCATTGATTGCTG CAGTCATAACAAGAGAAGTG GTTTTGTGCTGCCTGGTTT 8900

8901 GCCTGGCAGCATATTACGCA CAACTAATGGTACCTTTTGG CATTCTTACCTAGAGTTT TAGTGCAGTGGTAACATCT GTTACACACCATCAAACTA 9000

9001 TTAGAGTACACTGACTTTGC AACATCAGCTTGTGTTTGG CTGCTGAATGTACAATTTT AAAGATGCTTCTGGTAAGCC AGTACATTATTGTTATGATA 9100

9101 CCAATGTACTAAAAGGTCTT GTTGCTTATGAAAGTTTACG CCCTGACACACGTTATGTGC TCATGGATGGCTCTATTATT CAATTTCTCACTAACTAACCT 9200

9201 TGAAGGTTCTGTAAGAGGCG TAACAACCTTTTGATTCTGAG TACTGTAGGCACGGCACTTG TGAAAGATCAGAAGCTGGTG TTTGTGTATCTACTAGTGGT 9300

9301 AGATGGGTACTTAACAATGA TTATTACAGATCTTTACCGT GAGTTTTCTGTGGTGTAGAT GCTGTAAATTTACTTACTAA TATGTTTACACCACTAATTC 9400

9401 AACCTATTGGTGCTTTGGAC ATATCAGCATTAATAGTAGC TGGTGGTATTGTAGCTATCG TAGTAACATGCCTTGCTTAC TATTTTATGAGGTTTAGAAG 9500

9501 AGCTTTTGGTGAATACAGTC ATGTGCTTGCCTTTAATACT TTACTATTCTTATGTCAIT CACTTCACTCTGTTAAACAC CAGTTTACTCATTCTTACCT 9600

9601 GGTGTTTATTCTGTTAITTA CTGTACTTGACATTTTATC TTACATATGATGTTTCTTT TTAGCACATATTCAGTGGAT GGTTATGTCACACCTTTAG 9700

9701 TACCTTTCTGGATAACAATT GCTTATATCATTTGTATTTC ATCATAGCAITTTCTATTGGT TCTTAGTAATTACCTAAAG AGACGTGTAGCTTTAATGG 9800

9801 TGTTCCTTTAGTACTTTTG AAGAAGCTGCGCTGTGCACC TTTTGTGTAATAAAGAAAGT GTATCTAAAGTTCGCTAGTG ATGTGCTATTACCTCTTACG 9900

9901 CAATATAATAGATACTTAGC TCTTTATAATAAGTACAAGT ATTGTAGTGGAGCAATGGAT ACAACTAGCTACAGAGAAGC TGCTTGTGTCTATCTCGCAA 10000

10001 AGGCTCTCAATGACTTCAGT AACTCAGGTTCTGATGTCTT TTACCAACCACCACAAAACCT CTATCACCTCAGCTGTTTTG CAGAGGTGTTTTAGAAAAAT 10100

10101 GGCATTCCCATCTGGTAAAG TTGAGGGTGTGATGGTACAA GTAACCTGTGGTACAACCTAC ACTTAACGGTCTTTGGCTTG TAGACGTAGTTTACTGTCCA 10200

10201 AGACATGTGATCTGCACCTC TAGAGACATGCTTAACCTTA ATTATGAAGATTTACTCAIT CGTAAGTCTAATCATAATTT CTGGTACAGGCTGGTAATG 10300

10301 TTCAACTCAGGGTTATTGGA CATTCTATGCAAAAATTGTGT ACTTAAGTTTAAAGGTTGATA CAGCCAATCCTAAGACACCT AAGTATAAGTTTGTTCGCAT 10400

10401 TCAACCAGGACAGACTTTTT CAGTGTAGCTTGATACAAT GGTTCACCATCTGGTGTTCA CCAATGTGCTATGAGGCCCA ATTTCACTATTAAGGGTTCA 10500

10501 TTCCTTAATGGTTCGTGGG TAGTGTGTGTTTTAACATAG ATTACTGTGTCTCTTTT TGTACATGCACCATATGGA ATTACCAACTGGAGTTCATG 10600

10601 CTGGCACAGACTTAGAAGGT AACTTTTAGTGACCTTTTGT TGACAGGCAACAGCACAAG CAGCTGGTACGGACACAACCT ATTACGATTAATGTTTTAGC 10700

10701 TTGGTTGTACGCTGCTTCTA TAAATGGAGACAGGTGGTTT CTCAATCGATTIACCACAAC TCTTAATGACTTTAACTTTG TGGCTATGAAGTACAATTAT 10800

10801 GAACCTCTAACACAAGACCA TGTAGCATACTAGGACCTC TTTCTGCTCAAACTGGAATT GCCGTTTAGATATGTGTGC TTCATTAAGAATTACTGC 10900

10901 AAAATGGTATGAATGGACGT ACCAATTTGGGTAGTGCTTT ATTAGAAGATGAATTTACAC CTTTGTGATGTGTAGACAA TGCTCAGGTGTIACCTTCCA 11000

11001 AAGTGCAGTGAAGAAGACAA TCAAGGGTCGACACCACTGG TTGTACTCACAATTTTGAC TTCACTTTTAGTTTGTAGTCC AGAGTACTCAATGGTCTTTG 11100

11101 TTCTTTTTTTTGTATGAAAA TGCCTATATACCTTTTGCTA TGGTAATTATTGTCTATGCT GCTTTTGCAATGATGTTTGT CAAACATAAGCATGCATTC 11200

11201 TCTGTTTGTTTTGTIACCT TCTTATGCCACTGTAGCTTA TTTAATATGGTCTATATGC CTGCTAGTAGGGTGATGCGT ATTATGACATGGTTGGATAT 11300

11301 GGTGTACTAGTTTGTCTG GTTTTAAAGCTAAAAGACTGT GTTATGTATGCATCAGCTGT AGTGTACTAATCCTTATGA CAGCAAGAAGTGTGTATGAT 11400

11401 GATGGTGCTAGGAAGGTGTG GACACTTATGAATGTCTTGA CACTCGTTTATAAAGTTTTA TATGGTAATGCTTATAGTCA AGCCATTTCTCTGTTGGGCTC 11500

11501 TTATAATCTCTGTIACCTCT AACTACTCAGGTGTAGTTAC AACGATCATGTTTTTGCCCA GAGGTATIGTTTTTATGTGT GTTGAGTATTGCCCTATTTT 11600

11601 CTTCATAACTGGTAATACAC TTCATAGTATAATGTAAGTT TATTGTTCCTTAGGCTATTT TTGACTTGTIACCTTTGGCC TCTTTGTIACCTCAACCGC 11700

11701 TATCTTAGACTGACTCTTGG TGTTTATGATTACTTAGTTT CTACACAGGAGTTTAGATAT ATGAATTCACAGGGACTACT CCCACCCAAGAATAGCATAG 11800

11801 ATGCCCTCAAACCTCAACATT AAATGTGTGGGTGTGTGGG AAAACCTTGTATCAAAGTAG CCACTGTACAGTCTAAAATG TCAGATGTAAAGTGCACATC 11900

11901 AGTAGTCTTACTCTCAGTTT TGCAACAACCTCAGAGTAGAA TCATCATCTAAATTGTGGGC TCAATGTGTCCAGTTACACA ATGACATTCTCTIAGCTAAA 12000

12001 GATACTACTGAAGCCTTTGA AAAAATGGTTTCTACTACTTT CTGTCTTGTCTTCCATGCAG GGTGCTGTAGACATAACAA GCTTTGTGAAGAAATGCTGG 12100

12101 ACAACAGGGCAACCTTACAA GCTATAGCCTCAGAGTTTAG TTCCCTTCCATCATATGCAG CTTTGTGCTGTCTCAAGAA GCTTATGAGCAGGCTGTTCG 12200

12201 TAATGGTGATTCTGAAGTTG TTCTTAAATGTGAAGAAG TCTTGAATGTGGCTAAATC TGAATTGACCGTGATGCAG CCATGCAACGTAAGTTGGAA 12300

12301 AAGATGGTACTCAAGCTAT GACCCAATGTATAAACAGG CTAGATCTGAGGACAAGAGG GCAAAGTTTACTAGTGTAT GCAATCAATGCTTTTCACTA 12400

12401 TGCTTAGAAAGTTGGATAAT GATGCACTCAACAACATTAT CAACAATGCAAGAGATGTAT GTGTTCCCTTGAACATAATA CCTTTACAACAGCAGCCAA 12500

12501 ACTAATGGTTGTATACCAG ACTATAACACATATAAAAAAT ACGTGTGATGTCAACACATT TACTTATGCATCAGCAITGT GGGAAATCCAACAGGTGTGA 12600

12601 GATGCAGATAGTAAAAATGT TCAACTTAGGAAATTAGTA TGGACAATTCACTAATTTA GCATGGCCTCTTATTGTAA CAGCTTTAAGGGCCAATTCTG 12700

12701 CTGTCAAATTACAGAAATAG GAGCTTAGCACTGTGCACT ACGACAGATGTCTGTGCTG CCGTACTACACAAACTGCT TGCCTGTATGACAATGCGTT 12800

12801 AGCTTACTACAACACAACAA AGGGAGTTAGGTTTGTACTT GCAGTGTATCCGATTTACA GGATTTGAAATGGCTAGAT TCCCTAAGAGTGATGGACCT 12900

12901 GGTACTATCTATACAGAACT GGAACCACTTTGAGGTTTG TTACAGACACACCTAAAGGT CCTAAGTGAAGTATTATA CTTTATAAAAGGATTAAACA 13000

13001 ACCTAAATAGAGGTATGGTA CTTGGTAGTTTAGCTGCCAC AGTACGTCTACAAGCTGGTA ATGCAACAGAAGTGCTGCT AATTCAACTGTATTATCTTT 13100

13101 CTGTGCTTTTGTCTGTAGATG CTGCTAAAGCTTACAAAGAT TATCTAGCTAGTGGGGACA ACCAATCTACTAATTGTGTTA AACTGTTGTGTACACACACT 13200

13201 GGTACTGGTCAGGCATATAC AGTTACACCGGAAGCCAATA TGGATCAAGAATCCTTTGGT GGTGCATCGTGTGTCTGTA CTGCCGTGCCACATGTATC 13300

13301 ATCCAAATCTAAAGGATTT TGTGACTTAAAAAGGTAAAG ATGTACAATACCTACAACCT TGTGCTAATGACCCTGTGGG TTTTACACTTAAAAACACAG 13400

13401 TCTGTACTGACTGCGGTATG TGGAAAGGTTATGGCTGTAG TTGTGATCAACTCCGCGAAC CCATGCTTCAGTCAGCTGAT GCACAATCGTTTTTAAACGG 13500

13501 GTTGTGCGGTGAAGTGCAGC CTGCTTACACCGTGCGGCA CAGGCAGTACTACTGATGTC GTATACAGGGCTTTTGACAT CTACAATGATAAAATTGCTG 13600

13601 GTTTTGCTAAATTCCTAAAA ACTAATTGTGTGCGCTTCCA AGTAAAGGACGAAGATGACA ATTTAATTGATTCTIACCTT GTAGTTAAGAGACACACTTT 13700

13701 CTCTAACTACCAACATGAAG AAACAATTATAATTACTT AAGTAATGTCCAGCTGTGC TAAACATGACTTCTTTAAGT TTAGAATAGACGGTGACATG 13800

13801 GTACCATACATATCAGTCA ACGTCTTACTAATACACAA TGGCAGACCTCGTCTATGCT TTAAGGCATTTTGATGAAGG TAATTGTGACACATFAAAG 13900

13901 AATTACTGTACATACAAT TGTTGTGATGATGATTATTT CAATAAAAAGGACTGGTATG ATTTGTAGAAAGCCCAGAT ATATTACGGTATACGCCAA 14000

14001 CTAGGTGAACGTGTACGCC AAGCTTTGTGTA AAAACAGTA AATTTCTGTGATGCCATGCA ATATGCTGGTATTGTTGGTA TTCTGACATTAGAATTTCAA 14100

14101 GATCTCAATGGTAACTGGTA TGATTCGGTGATTTTATAC AAACCACGCCAGGTAGTGA GTTCTCTGTTGATGATTCTTA TTACTTTTGTAAATGCCTA 14200

14201 TATTAACCTTGAACCGGGCT TTAAGTGCAGAGTCACATGT TGACACTGACTTAACAAAGC CTTACATTAAGTGGGATTAG TTAAAATATGACTTCACGGA 14300

14301 AGAGAGGTTAAAACCTTTTG ACCGTTATTTTAAATATTGG GATCAGACATACCACCCAAA TTGTTTAACTGTTTGATG ACAGATGCATTCTGCATTGT 14400

14401 GCAAACCTTAAATGTTTTATT CTCTACAGTGTCCCACTTA CAAGTTTTGGACCACTAGTG AGAAAAATATTGTTGATTG CGTTCATTGTAGTTTCAA 14500

14501 CTGGATACCACTTCAGAGAG CTAGGTGTTGTACATAATCA GGATGTAACCTACATAGCT CTAGACTTAGTTTTAGGTAA TTACTTGTGTATGCTGCTGA 14600

14601 CCTGTCTATGCACGCTGCTT CTGGTAATCTATTACTAGAT AAACGCACACTACGTCTTTTC AGTAGCTGCACTTACTAACA GTCTTGCTTTTCAAACGTG 14700

14701 AAACCCGGTAAATTTAACAA AGACTTCTATGACTTTTGCTG TGTCTAAGGGTTTCTTTAAG GAAGGAAGTTCTGTGAATT AAAACACTTCTTCTTTGCTC 14800

14801 AGGATGGTAATGCTGCTATC AGCGATTATGACTATTATCG TTATAATCTACCAACAATGT GTGATATCAGACAACACTA TTTGTAGTTGAAGTTGTTGA 14900

14901 TAAGTTCCTTGATTGTIACG ATGGTGGCTGTATTAATGCT AACCAAGTCATCGTCAACAA CCTAGACAAATCAGCTGGT TTCCATTTAATAAAGTGGT 15000

15001 AAGGCTAGACTTTTATTATGA TTCAATGAGTTATGGGTATC AAGATGCACCTTTTCGCATAT AAAAAACGTAATGTCATCCC TAC-ATAACTCAAATGAATC 15100

15101 TTAAGTATGCCATTTGCGCA AAGAATAGAGCTCGCACCCT AGCTGGTGTCTCTATCTGTA GTTCAATGACCAATAGACAT TATCCTAAAAAATTTTGAA 15200

15201 ATCAATAGCCGCACTAGAG GAGTACTCTAGTAATTGGA ACAAGCAAAATCTATGGTGG TTGGCACAACATGTTAAAAA CTGTTTATAGTGATGTAGAA 15300

15301 AACCCCTACCTTATGGGTTG GGATATTCCAAATGTGATA GAGCCATGCCTAACATGCTT AGAATTATGGCCTCACTTGT TCTTGCTCGAAACATACAA 15400

15401 CGTGTGTAGCTTGTACAG CGTTTCTATAGATTAGCTAA TGATGTGCTCAAGTTTGA GTGAAATGGTTAAGTGTGGC GGTTCACTATATGTTAAACC 15500

15501 AGGTGGAACCTCATCAGGAG ACGACACAAGCTGTTATGCT AATAGTGTTTTTAACATTG TCAAGCTGTCACGGCCAATG TTAATGCACCTTTTATCTACT 15600

15601 GATGGTAACAAAATGGCGA TAAGTATGTCGCCGAATTTAC AACACACATTTTATGAGTGT CTCTATAGAAATAGAGATGT TGACACAGACTTTGTGAATG 15700

15701 AGTTTTACGCATATTGCGT AAACATTTCTCAATGATGAT ACTCTCTGACGATGCTGTG TGTGTTCAATAGCACTTAT GCATCTCAAGGTCTAGGGG 15800

15801 TAGCATAAAGAACTTAAAGT CAGTCTCTTATATCAAAAC AATGTTTTATGCTGAAGC AAAATGTTGGACTGAGACTG ACCTTACTAAAGGACCTCGT 15900

15901 TAATTTTGCTCTCAACATAC AATGCTAGTTAAACAGGGTG ATGATTATGTGTCTTTCT TACCCAGATCCATCAAGAAT CCTAGGGGCCGGCTGTTTTG 16000

16001 TAGATGATATCGTAAAAACA GATGGTACATTAATGATTGA ACGGTTCGTGCTTTAGCTA TAGATGCTTACCCACTTACT AAATCCTCAATCAGGAGTA 16100

16101 TGCTGATGCTTTTCATTGT ACTTACAATACATAAGAAAG CTACATGATGAGTAATCAGG ACACATGTAGACATGATTT CTGTTATGCTTACTAATGAT 16200

16201 AACACTTCAAGGTATTGAGT ACCTGAGTTTTATGAGCTA TGTACACACCGCATACAGTC TTACAGGCTGTGGGGCTTG TGTCTTTGTAATTCACAGA 16300

16301 CTTCAATTAAGATGTGGTGT TGCATACGTAGACCAATCTT ATGTTGTAATGGTTTTACG ACCATGTCATATCAACATCA CATAAATTACTATTGTCTGT 16400

16401 TAATCCGTATGTTGCAATG CTCAGGTGTGTATGTACACA GATGTGACTCAACTTTACTT AGGAGGTATGAGCTATTATT GTAAATCACATAAAACTCCG 16500

16501 ATTAGTTTTCCATTGTGTTC TAATGGACAAGTTTTGGTT TATATAAAAATACATGTGTT GGTAGCGATAATGTTACTGA CTTAATGCAATTTCAACAT 16600

16601 GTGACTGGACAAATGCTGGT GATTACATTTTATGTAACAC CTGTACTGAACGACTCAAGC TTTTTCAGCAGAAACGCTC AAAGCTAC-GAGGAGACTT 16700

16701 TAAACTGTCTTATGGTATTG CTACTGTACGTGAAGTTCAG TCCGACAGAGAATTACATCT TTCATGGGAAGTTGGTAAAC CTAGACCACCACCTTAACCGA 16800

16801 AATTATGCTTTTACTGGTTA TCGTGTAACTAAAAACAGTA AAGTAATATAGGAGAGTAC ACCTTTGAAAAAGGTGACTA TGGTATTCCGTTGTTTACC 16900

16901 GAGGTACAACAACCTTACAAA TTAATGTGGTTGATTATTT TGTGCTGACATCACATACAG TAATGCCATTAAGTGCACCT ACACTAGTGCCACAAGAGCA 17000

17001 CTATGTTAGAAATTCAGGCT TATACCAACACTCAATATC TCAGATGAGTTTCTTAGCAA TGTTCGCAATATCAAAAAGG TGGTTATGCAAAAGTATTCT 17100

17101 ACACTCCAGGACCACCTGG TACTGGTAAGAGTCATTTTG CTAATGGCTAGCTCTCAAC TACCCTTCTGCTCGCATAGT GTATACAGCTTGCTCTCATG 17200

17201 CCGCTGTGATGCACTATGT GAGAAGGCATTAAATATTT GTCAATAGATAAATGTAGTA GAATTATACCTGCACGTGCT CGTGTAGAGTGTTAGATAA 17300

17301 ATTCAATGAGAATTCACAT TAGAACGATATGCTTTTGT ACTGTAATGCATTGCCTGA GACGACAGCAGATAGTTG TCTTTGATGAATTATCAATG 17400

17401 GCCACAAATATGATTGTAG TGTGTCAATGCCAGATTAC GTGCTAAGCACTATGTGTAC ATGGCGACCTGCTCAATT ACCTGCACCACGCACATTGC 17500

17501 TAACTAAGGGCACACTAGAA CCAGAATATTTCAATTCAGT GTGCAGACTTATGAAACTA TAGGTCCAGACATGTTCTCT GGAACCTGTGCGCGTTGTCC 17600

17601 TGCTGAAATGTTGACACTG TGATGTCTTTGTCTATGAT AATAAGCTTAAAGCACATAA AGACAAATCAGCTCAATGCT TAAAAATGTTTTAAAGTGA 17700

17701 TTAATCACCGCATGATGTTT ATCTGCAATTAACAGGCCAC AAATAGGCGTGGTAAGAGAA TTCCTTACACGTAACCCCTGC TTGAGAAAAAGCTGTCTTTA 17800

17801 TTTACCTTATAATTACAG AATTCAAGTACCTCAAGAT TTTGGGACTACCAACTCAAA CTGTGATTATCATCAGGGC TCAGAATATGACTATGACAT 17900

17901 ATTCACTCAAAACCACTGAAA CAGCTCACTCTGTAATGTA AACAGATTAAATGTGCTAT TACCAGAGCAAAAGTAGGCA TACTTTGTACAATGTCTGAT 18000

18001 AGAGACCTTTATGACAAGTT GCAATTTACAAGTCTTGAAA TTCCACGTAGGAATGTGGCA ACTTTACAAGCTGAAAATGT AACAGGACTCTTTAAAGATT 18100

18101 GTAGTAAGGTAATCACTGGG TTACATCTACACAGGCACC TACACCCCTCAGTGTGACA CTAATTCAAAACCTGAAGGT TTAGTGTGACATACCTGG 18200

18201 CATACCTAAGGACATGACCT ATAGAAGACTCATCTCTATG ATGGGTTTTAAATGAATTC TAAAGTTAATGGTTACCCTA ACATGTTTATCACCCGCGAA 18300

18301 GAAGCTATAAGACATGTACG TGCATGGATTGGCTCGATC TTGAGGGGTGTCATGCTACT AGAGAAGCTGTGGTACCAA TTTACCTTTACAGCTAGGTT 18400

18401 TTTCTACAGGTGTTAACCTA GTTGCTGTACCTACAGGTTA TGTGATACACCTGATAATA CAGATTTTCCAGAGTTAGT GCTAAACCACCGCTGGAGA 18500

18501 TCAATTTAAACACCTCATAC CACTTATGTACAAAGGACTT CCTTGGTACGTAGTGCGTAT AAAGATTGTACAAATGTAA GTGACACACTTAAAAATCTC 18600

18601 TCTGACAGAGTCATGTGCT GTTATGGGCACATGGCTTTG AGTTGACATCATGAAGTAT TTTGTGAAAATAGGACCTGA GCGCACCTGTGTCTATGTG 18700

18701 ATAGACGTGCCACATTCCTT TCCACTGCTTCAGACACTTA TGCCTGTGGCATCTTCTA TTGGATTGTATTACGCTCTAT AATCCGTTTATGATTGATGT 18800

18801 TCAAAAAATGGGTTTTACAG GTAACCTACAAGCAACCAT GATCTGTATTGTCAAGTCCA TGGTAATGCACATGTAGCTA GTTGTGATGTAATCATGACT 18900

18901 AGGTGTCTAGCTGTCCACGA GTGCTTTGTGAAGCGTGTG ACTGGACTATTGAATATCTT ATAATTGGAGTTGAAGTCAA GATTAATGCGGCTGTAGAA 19000

19001 AGGTTCAACACATGGTTGTA ATAGCTGCATTATTAGCAGA CAAATTCAGTCTTCTCACG ACATTGGTAACCTTAAAGCT ATTAAGTGTGACCTCAAGC 19100

19101 TGATGTAGAATAGTAGTTCT ATGATGCACAGCCTGTAGT GACAAAGCTTATAAAATAGA AGAATTATTCTATCTTATG CCACACATTCTGACAAATTC 19200

19201 ACAGATGGTGTATGTCAATT TTGGAATGTCAATGTGATA GATATCTGCTAATTCCAAT GTTAGTAGATTGACACTAG AGTGCTATCTAACCTTAACT 19300

19301 TGCCTGGTGTGATGGTGGC AGTTTGTATGTAAATAACA TGCATCCACACACCAGCTT GTAATAAAAGTGCTTTTGT TAAATTTAAACAATTACCAT 19400

19401 TTTCTATTACTCTGACAGTC CATGTAGTCTCATGAAAAA CAAGTAGTGTGAGATAGTA TTATGTACCACTAAGGTCTG CTACGTGTATAACAGTTGC 19500

19501 AATTTAGTGGTGTGCTGTG TAGACATCATGCTAATGAGT ACAGATTGTATCTCGATGCT TATAACATGATGATCTCAGC TGGTTATAGCTGTGGGTTT 19600

19601 ACAACAATTGATACTTAT AACCTCTAGGACACTTTTAC AAGACTTCAGAGTTTAGAAA ATGTGGCTTTAATGTTGTA AATAAGGGACACTTTGATGG 19700

19701 ACAACGGTGTGAAGTACCAG TTTCTATCATTAAACACT GTTTCACAAAAATTAGATGG TGTGTAGTAGAATTGTGTA AAAATAAAACAACAATCCT 19800

19801 GTTAATGTAGCATTGAGCT TTGGGCTAAGCGCAACATTA AACCACTACCAGAGGTGAAA ATACTCAAAAATTTGGGTGT GGACATTGCTGCTAATACTG 19900

19901 TGATCTGGGACTACAAAAGA GATGCTCCAGCACATATATC TACTATTGGTGTAGTTCTA TGACTGACATAGCCAAGAAA CCAACTGAAACGATTGTGC 20000

20001 ACCACTCACTGTTTTTTTTG ATGTAGAGTTGATGGTCAA GTAGACTTATTAGAAATGC CCGTAATGGTGTCTIATTA CAGAAGGTAGTGTTAAAGGT 20100

20101 TTACAACCATCTGTAGGTCC CAAACAAGCTAGTCTTAATG GAGTCAGATTAATTGGAGAA GCCGTAAAAACACAGTTCAA TTATTATAAGAAAGTTGATG 20200

20201 GTGTGTGCCAACAATTACCT GAAACTTACTTTACACTGAG TAGAAATTTACAAGAATTAA AACCCAGGAGTCAAATGGAA ATTGATTTCCTTAGAATTAGC 20300

20301 TATGGATGAATTCATGAAC GATTTAAATTAGAAGGCTAT GCCTTCGAACATATCGTTTA TGGAGATTTTAGTCATAGTC AGTTAGGTGGTTTACATCTA 20400

20401 CTGATTGGACTAGCTAAACG TTTTAAGAATTCACCTTTTG AATTAGAAGATTTTATTCTT ATGGACAGTACAGTTAAAAA CTATTTCATAACAGATCGCA 20500

20501 ACACAGGTTCACTAAGTGT GTGTGTTCTGTATTGATTT ATTACTTGATTAAATTTGTTG AAATAATAAAATCCCAAGAT TTATCTGTAGTTTCTAAGGT 20600

20601 TGTCAAAGTGACTATTGACT ATACGGAATTTTCATTTATG CTTTGGTGTAAGATCGTCA TGTAGAAACATTTIACCCTAA AATTACAATCTAGTCAAGCG 20700

20701 TGGCAACCGGTGTGTGCTAT GCCTAATCTTTACAAAACGA AAAGAATGCTATTAGAAAAA TGTGACCTTCAAAATTATGG TGATAGTGAACATTACCTA 20800

20801 ATGGCATAATGATGAATGTC GCAAAATATACTCAACTGTG TCAATATTTAAACACATTAA CATTAGCTGTACCTTATAAT ATGAGAGTTATACTGTGTGG 20900

20901 TGTCTGGTTCTGATAAAGGAG TTGCACCAGGTACAGCTGTT TTAAGACAGTGGTTGCCCTAC GGGTACGCTGCTTGTCTGTC CAGATCTTAATGACTTTGTC 21000

21001 TCTGATGCAGATTCACTTT GATTGGTGATTGTGCAACTG TACATACAGCTAATAAATGG GATCTCATTATTAGTGATAT GTACAACCTTAAGACTAAAA 21100

21101 ATGTTACAAAAGAAATGAC TCTAAGAGGGTTTTTTCAC TTACATTGTGGGTTTATAA ATCAATAGCTAGCTCTTGA GGTTCGGTGGCTATAAGGAT 21200

21201 AACAGAACATCTTGGAATG CTGATCTTTATAAGCTCATG GGACACTTCGCATGGTGGAC AGCCTTTGTACTAATGTGA ATGCGTTCATCTGAAGCA 21300

21301 TTTTAAATTGGATGTAATTA TCTTGGCAAAACCATGCGAAC AAATAGATGGTTATGTCATG CATGCAAATTACATATTTTG GAGGAATACAAATCCAATT 21400

21401 AGTTGTCTTCCTATTCTTIA TTGCATGAGTAAATTTCC CCTTAAATTAAGGGGTACTG CTTTCATGCTTTTAAAGAA GGTCAAATCAATGATATGAT 21500

21501 TTTATCTCTCTTAGTAAAG GTAGACTTATAATTAGAGAA AACAACAGAGTTGTATCTA TAGTGATGTTCTTGTTAACA ACAATACGAACAATGTTTGT 21600

21601 TTTTCTGTTTTATTGCCAC TAGTCTCTAGTCAGTGTGTT AATCTTAAATCCAGAACTCA ATTACCCCTGCATACACTA ATTCTTTCACAGTGGTGT 21700

21701 TATTACCCAGGCAAGTTTT CAGATCTCAGTTTACATT CAACTCAGGACTTGTCTTIA CCTTCTTTTCCAATGTIAC TTGGTCCATGCTATACATG 21800

21801 TCTCTGGGACAATTGGTACT AAGAGGTTTGATAACCTGTG CCTACCATTAAATGATGGTG TTTATTTTGTCTCCACTGAG AAGTCAATCATAATAAGAGG 21900

21901 CTGGAATTTTGGTACTACTT TAGATTCAAGACCCAGTCC TACTTATTTGTTAATAACTC AACTAATGTTGTTATTAAG TCTGTGAATTTCAATTTGT 22000

22001 AATGATCCATTTTGGGTGT TTATTACCACAAAAACAACA AAAGTTGGATGGAAGTGAG TTCAGAGTTTATTCTAGTGC GAATAATTGCACCTTTGAA 22100

22101 AGGTCTCTCAGCCTTTTCTT ATGGACCTTGAAGGAAAAACA GGGTAATTTCAAAAATCTTA GGGAAATTTGTGTTAAGAAT ATTGATGGTTATTTAAAAAT 22200

22201 ATATTCTAAACACAGCCTTA TTAATTTAGTGCGTGATCTC CCTCAGGTTTTTTCGGCTTT AGAACCATTGGTAGATTTC CAATAGGTATTAAACATCACT 22300

22301 AGGTTTCAAATTATACTTTC ATTACATAGAAGTTATTGA CTCTGGTGATTCTTCTTCA GGTGGACAGCTGGTGTCTGC AGCTTATTATGTGGGTIATC 22400

22401 TTCAACCTAGGTCATTTCTA TTAAATATAATGAAATGG AACCATACAGATGCTGTAG ACTGTGCACTTGACCTCTC TCAGGAACAAAGGTACGTT 22500

22501 GAAATCCTTCACTGTAGAAA AAGGAATCTATCAAACTCTT AACTTTAGAGTCCAACCAAC AGAATCTATTGTTAGATTTC CTAATATTAAATACTTGTGC 22600

22601 CCTTTTGGTGAAGTTTTTAA CGCCACCAGATTTCATCTG TTTATGCTTGGACAGGAAG AGAATCAGCAACTGTGTGC TGATTATTCTGTCTATATA 22700

22701 ATTCCGTACCATTTTCCACT TTTAAGTGTATTGGAGTGTG TCCTACTAAATTAATGATC TCTGCTTACTAATGTCTAT GCAGATTCATTGTAAATTAG 22800

22801 AGGTGATGAAGTCAGACAAA TCGCTCCAGGACAACTGGA AAGATTGCTGATTATAATTA TAAATTACCAGATGATTTTA CAGGCTGCGTTATAGCTTGG 22900

22901 AATTCTAACAATCTTGATTC TAAGGTTGGTGGTAATTATA ATTACCTATATAGATTGTT AGGAAGTCTAATCTCAAACC TTTTGAGAGAGATATTCAA 23000

23001 CTGAAATCTATCAGGCCGTG AGCACACCTTGAATGGTGT TGAAGGTTTAAATGTTACT TCCTTTTACAATTATATGGT TTCCAACCCACTAATGGTGT 23100

23101 TGGTTACCAACCATACAGAG TAGTAGTACTTCTTTTGAA CTTCATCATGCACCAGCAAC TGTGTGTCATCTAAAAAGT CTACTAATTTGGTTAAAAAC 23200

23201 AAATGTGTCAATTTCAACTT CAATGGTTTACAGGCACAG GTGTCTTACTAGTCTAAC -AAAAGTTTCTGCCCTTTCA ACAATTTGGCAGAGACATTG 23300

23301 CTGACACTACTGATGTGTC CGAGGTCCACAGACACTTGA GATTCTTGACATTACACCAT GTTCTTTTGGTGGTGTCAGT GTTATAACCCAGGAACAAA 23400

23401 TACTTCTAACCAAGTTGCTG TTCTTTATCAGGGTTTCAAC TGCACAGAAGTCCCTGTGC TATTCATGCAGATCAACTTA CTCTACTTGGCGTGTIAT 23500

23501 TCTACAGGTTCTTAAGTTTC TAAACACCGTGCAAGCTGTT TAATAGGGGCTGAACATGTC AACAACCTCATATGAGTGTGA CATACCATTGGTGCAGGTA 23600

23601 TATGCGCTAGTTATCAGACT CAGTCTAATTCCTCTCGCG GGCACGTAGTGTAGCTAGTC AATCCATCATTGCATCACT ATGTCACTTGGTGCAGAAAA 23700

23701 TTCAGTTGCTTACTCTAATA ACTCTATTGCCATACCCACA AATTTTACTATTAGTGTTC CACAGAAATCTACCAGTGT CTATGACCAAGACATCAGTA 23800

23801 GATTGTACAAATGTACATTG GGTGATTCAACTGAATGCA GCAATTTATTGTGCAATAT GGCAGTTTTGTACACAATT AAACCGTGTCTTAAGTGA 23900

23901 TAGCTGTGAACAAGACAAA AACACCCAAGAAGTTGTAC ACAAGTCAACAAATTTACA AAACACCACCAATTAAAGAT TTTGGTGGTTTAAATTTTC 24000

24001 ACAATAATTCAGATCCAT CAAAACCAAGCAAGAGTCA TTAATTGAAGATCTACTTTT CAACAAAGTGACACTTGCAG TTGCTGGCTTCATCAAAACA 24100

24101 TATGGTGATTGCTCTGGTGA TATTGCTGTAGAGCCCTCA TTTGTGCACAAAAGTTTAA GGCCTTACTGTTTIGCCACC TTTGCTCAGATAAGATGA 24200

24201 TTGCTCAATCACTTCTGCA CTGTAGCGGGTACTATCAC TTCTGGTTGGACCTTTGGTG CAGGTGCTGCATTACAAATA CCATGTACTATGCAAATGGC 24300

24301 TTATAGGTTTAAATGGTATTG GAGTTACACAGAATGTTCTC TATGAGAACCAAAAATTGAT TGCCAACCAATTTAATAGTG CTATTGGCAAAATCAAGAC 24400

24401 TCACCTTCTTCCACAGCAAG CGAACTTGGAAAACTTCAAG ATGTGGTCAACCAAAATGCA CAAGCTTAAACACGCTTGT TAAACAACCTAGCTCCAATT 24500

24501 TTGTTGCAATTTCAAGTGT TTAATGATATCTTTCACG TCTTGACAAAGTTGAGGCTG AAGTGCAAAATGATAGGTTG ATCAGAGGCAGACTTCAATG 24600

24601 TTGTCAGACATATGACTC AACAATTAATTAGAGCTGCA GAAATCAGAGCTTCTGCTAA TCTTGCTGCTACTAAATGT CAGAGTGTGACTTGGACAA 24700

24701 TCAAAAAGAGTTGATTTTTG TGAAGAGGGCTATCATCTTA TGTCTTCCCTCAGTCAGCA CCTATGGTGTAGTTTCTT GCATGTGACTTATGTCCTG 24800

24801 CACAAGAAAAGAACTTCACA ACTGCTCTGCCATTGTGCA TGATGGAATAGCACACTTTC CTCGTGAAGGTGCTTTGT TCAAATGGCACACACTGGTT 24900

24901 TGTAACACAAAGGAATTTTT ATGAACCACAAATCACTACT ACAGACAACACATTTGTGTC TGGTAACTGTGATGTTGTAA TAGGAAGTCTCAACAACACA 25000

---

25001 GTTTATGATCCTTTGCAACC TGAATTAGACTCATTCAAGG AGGAGTTAGATAAATATTTT AAGAATCATACATCACCAGA TGTTGATTTAGGTGACATCT 25100

25101 CTGGCATTATGCTTCAGTT GTAAACTTACAAAAAGAAAT TGACCGCCTCAATGAGGTG CAATGAATTTAAATGAATCT CTCATCGATCTCCAAGAACT 25200

25201 TGGAAAGTATGAGCAGTATA T-AAATGGCCATGGTACATT TGGCTAGGTTTATAGCTGG CTTGATTGCCATAGTAATGG TGACAATTATGCTTTGCTGT 25300

25301 ATGACCAGTTGCTGTAGTTG TCTCAAGGGCTGTGTCTT GGGTATCCTGCTGCAAAATT GATGAAGACGACTCTGAGCC AGTGCTCAAAGGAGTCAAAT 25400

25401 TACATTACACATAAACGAAC TTATGGATTIGTTTATGAGA ATCTCACAATTGGAACTGT AACTTTGAAGCAAGGTGAAA TCAAGGATGCTACTCCTTCA 25500

25501 GATTTTGTTCGCTCCACTGC AACGATACCGATACAAGCCT CACTCCCTTTCGGATGGCTT ATTGTTGGCGTTCACCTTCT TGCTGTTTTTCATAGCGCTT 25600

25601 ACTAAATCATAACCCTCAA AAGAGATGGCAACTAGCACT CTCCAAGGGTGTTCACCTTG TTTGCAACTTGCTGTGTGTG TTTGTAACAGTTTACTCACA 25700

25701 CCATTIGCTCGTGTGCTGT GCCTTGAAGCCCTTTTTTC TATCTTTATGCTTTAGTCTA CTCTTGCAAGATATAAAT ATGTAAGAATAATAATGAGT 25800

25801 CATTGGCTTTGCTGGAAATG CTGATCCAAAAACCCATTAC TTTATGATGACTACTATTTT CTTTGCTGGCATACTAATTG TTACGACTATTGTATACCTT 25900

25901 ACAATAGTGTAACTTCTTCA ATTGCTATTACTTCAGTTGA TGGCACACAAGTCTTATTT CTGAACATGACTACCAGATT GGTGGTTATACTGAAAAATG 26000

26001 GGAATCTGGAGTAAAAAGACT GTGTGTATTACACAGTTAC TTCAATTCAGACTATTACCA GCTGTACTCAACTCAATTGA GTACAGACACTGGTGTGAA 26100

26101 CATGTTACCTTCTTCATCTA CAATAATATTGTTGATGAGC CTGAAGAACATGTCCAAATT CACACAATCGACGGTTCATC CGGAGTTGTACTGCAGTAG 26200

26201 TAGCAGCAATTATGATGAA CCGACGACGACTACTAGCGC GACTTTGTAAGCACAAGCTG ATGAGTGCTAACTTATGTAC TCATTGTTTCGGAAGAGAC 26300

26301 AGGTACGTTAATAGTAAATA GCGTACTTCCTTTTCTTGCT TCGTGGTATTTTAGCTAGT TACACTAGCCATCCTTACTG CGCTTCGATTGTGTGCGTAC 26400

26401 TGTCTGAATATTGTTAACGA GTGCTTGTGAAACCTTCTT TTAGCTTTACTCTCGTGT AAAAACTCGAATCTCTTAG AGTTCCTGATCTTCTGTCT 26500

26501 AAACGAACTAAATACTATAT TAGTTTTTCTGTTTGGAACT TTAATTTTAGCCATGGCAGA TTCCAACGGTACTATTAGCC TTGAAGAGTAAAAAAGCTC 26600

26601 CGTCAACAATGGAACCTAGT AATAGGTTTCCATTTCCTTA CATGGATTGTCTTCTACAA TTTGCCTATGCCAACAGGAA TGGTTTTTTGTATATAITA 26700

26701 AGTTAATTTTCTCTGGCTG TTATGGCCAGTAACTTTAGC TTGTTTGTGCTGTCTGCTG TTTACAGAATAAATTGGATC AGCCGTGGAATTGCTATCGC 26800

26801 AATGGCTTGTCTGTAGGCT TGATGTGGCTAGCTACTTC ATTGCTTCTTCAGACTGTT TCGCGGTACGTATCCATGT GGTCAITCAATCCAGAAACT 26900

26901 AACATTTCTTCAACGTGCC ACTCCATGGCACTATTCTGA CCAGCCAGCTTCTAGAAAGT GAACTCGTAATCGGAGCTGT GATCCTTCGTGGACATCTTC 27000

27001 GTATTGCTGGACACCATCTA GGACGCTGTGACATCAAGGA CTGCTCTAAAGAAATCACTG TTGCTACATCAGAACGCTT TCTTATTGCAAATTTGGGAGC 27100

27101 TTCGACGCTGTAGCAGGTG ACTCAGGTTTGTGTCATAC AGTGTCTACAGGATTGGCAA CTATAATTAAACACAGACC ATCCTAGTAGCAGTGACAAT 27200

27201 ATTGCTTGTCTGTACAGTA AGTGACAACAGATGTTTCAT CTCGTGACTTTCAGGTTAC TATAGCAGAGATATTACTAA TTATTATGAGGACTTTTAAA 27300

27301 TTATCCATTGGAATCTTGA TTACATCATAAACCTCATAA TTAATAATTTATCTAAGTCA CTAAGTGAATAAATATTC ACAATTAGATGAAGAGCAAC 27400

27401 CAATGGATAATGATAAACG AACATGAAATTTATCTTTT CTGGCACTGATAACTCGC TACTTGTGAGCTTTATCAC TACCAAGAGTGTGTAGAGG 27500

27501 TACAACAGTACTTATTAAG AACCTTGCTCTTCTGGAACA TACGAGGGCAATTCACCAT TATCTCTAGCTGATAACA AATTCGAAGTACTTGTCTT 27600

27601 AGCACTCAATTTGCTTTTGC TTGCTCTACGCGCTAAAC ACGTCTATCAGTTACGTGCC AGATCAGTCTTACCTAACT GTTCATCAGACAAGAGGAAG 27700

27701 TTCAAGAACTTTACTCTCCA ATTTTCTTATGTTGCGGC AATAGTGTTTATAACCTATT GCTTCACACTCAAAGAAAG ACAGAATGATGAACCTTCA 27800

27801 TTAATTGACTTCTATTGTG CTTTITAGCCTTTCGCTAT TCCTGTGTTTAATTACGATT ATTACTTTTGGTTCCTACT TGAAGTGAAGATCATAATT 27900

27901 AAAGTGTACGCGCTAAACG AACATGAAATTTCTGTTTT CTIAGGAATCATCACAAGT TAGCTGCATTTCACCAAGAA TGTAGTTTACAGTTATGTAC 28000

28001 TCAACATCAACCATATAGT TTGATGACCCGTGTCTATT CACTTCTATTCTAAATGGTA TATTAGTAGGAGCTAGAA AATCAGCACCTTTAATTGAA 28100

28101 TGTGCGTGGATGAGGCTGG TTCTAAATACCCATTCACT ACATCGATATCGGTAATTAT ACAGTTTCTGTTTACCTTT TACAATTAATTGCCAGGAAC 28200

28201 CTAATTTGGGTAGTCTTGTA GTGCGTGTGCTGTTCTATGA AGACTTTTITAGAGTATCAT GACGTTCTGTGTGTTTAGA TTTCACTAAACGAACAAAC 28300

28301 TAAATGTCTGATAATGCAC TCCAAAATCAGCGAAATGCA CCCCATTACGTTTGTGGT ACCCTCAGATTCACTGGCA GTAACAGAAAGCGGAACGC 28400

28401 AGTGGGGCGCGATCAAAACA ACGTCGGCCCCAAGGTTTAC CCAATAACTGCGTCTTGG TTCACCGCTCTCACTCAACA TGGCAAGGAAGACCTTAAAT 28500

28501 TCTCTCGAGGACAAGCGTT CCAATTAACACCAATAGCAG TCCAGATGACCAAATTTGGCT ACTACCGAAGAGCTACCAGA CGAATTCGTGGTGGTGACGG 28600

28601 TAAATGAATGAAGTCACTC CAAGATGGTATTTCTACTAC CTAGGAAGTGGCCAGAAGC TGGACTTCCCTATGTGTCTA ACAAGACGGCATCATATGG 28700

28701 GTTGCAACTGAGGGAGCCTT GACTATACCAAAAGATCACA TTGGCACCCGCAATCTGCT AACAATGCTGCAATCGTGCA ACTACTTCTCAAGGAACAA 28800

28801 CATTGCCAAAAGGCTACTAC GCAGAAGGGAGCAGAGCGG CAGTCAAGCCTTCTCTGTT CCTCATCAGTAGTCGCAAC AGTTCAAGAAATCAACTCT 28900

28901 AGGCAGCAGTAGGGAACTT CTCCTGTAGAAATGGCTGGC AATGGCGGTGATGTCTCT TGCTTTGTCTGCTGTTAACT GATTGAACCAAGCTTGAGAGC 29000

29001 AAAATGTCTGGTAAAGGCCA ACAACAACAATGCCAAAGT TCACTAAGAAATCTGTGCT GAGGCTTCTAAGAAGCCTCG GCAAAAAACGTAAGTCCACT 29100

29101 AAAGCATACAATGTACACA AGCTTTCGCGAGAGCTGGTC CAGAACAAACCAAGGAAAT GTTGTGGACCAGGAACTAAT CAGACAAGGAAGTATTACA 29200

29201 ATCATAGGCCGCAAAATGCA CAATTGCCCCAGCGCTTC AGCGTTCTTCGGAATGTCGC GCATTGGCATGGAAGTACA CCTTCGGGAACGTGGTTGAC 29300

29301 CTAGACTCTGAGATCAAAA TGGTTGACAAAGATCCAAAA TTCTACGATTAAGTCAATTT GCTGAATAAACATTTTGACG CATACAAACATTCCACCA 29400

29401 ACAGAGCCTAAAAAGGACAA AAGAAGAAGGCTGATGAAA CTCAAGCCTTACCCGACAGA CGGAAAAACAGCAAAGTGT GACTCTTCTTCTGCTGCAG 29500

29501 AITTTGGATGATTCTTCCAAA CAATTGTCTACAATCCATGAG CAGTGTCTGACTCAACTCAGG CCTAAACTCATGCAGACCAC ACAAGGAGATGGGTATAT 29600

29601 AAACGTTTTTCGCTTTCCGT TTACGATATATAGTCTACTC TTGTGCGAATGAATCTCG TAACTACATAGCACAAGTAG ATGTAGTTAACTTTAATCTC 29700

29701 ACATAGCAATATTGTATCAG TGTGTAACATTAGGAGGAC TTGAAGAGGCCACCACATTT TCAGCGACGCCACGCGGAGT ACGATCGAGTGTACAGTGAA 29800

29801 CAATGCTAGGAGAGCTGCC TATAAGGATGAGCCCTAATG TGTAAATTAATTTTAGTAG TGCTATCCCCATGTGATTTT AATAGCTTCTTAGGAGAATG 29900

29901 ACAAAAAAAATACATGCG GGATAGCAC 29929

---

### 1.15. SRR12596175 Discovered Strain 2 Nucleotide Sequence

1 AGAGAACAGATCTACAAGAG ATCGAAAGTIGGTTGGTTTG TIACCTGGGAAGGTATAAAC CAACCAACTTTCGATCTCTT GTAGATCTGTCTCTAAACG 100

101 AACTTTAAATCTGTGTGGC TGCTACTCGCTGCATGCTT AGTGCACTACGCAGTATAA TTAATACTAATTACTGTCG TTGACAGGACACGAGTAACT 200

201 CGTCTATCTTCTGCAGGCTG CTTACGGTTTCGTCCGTGTT GCAGCCGATCATCAGCACAT CTAGGTTTTGTCCGGGTGTG ACCGAAAGGTAAGATGGAGA 300

301 GCCTTGTCCCTGGTTTCAAC GAGAAAACACACGTCCAACCT CAGTTTGCCTGTTTACAGG TTCGCGACGTGCTCGTACGT GGCTTTGGAGACTCCGTGGA 400

401 GGAGGTCTTATCAGAGGCAC GTCAACATCTTAAAGATGGC ACTTGTGGCTTAGTAGAAGT TGA AAAAGGCGTTTTCGCTC AACTTGAACAGCCCTATGTG 500

501 TTATCAAAACGTTCCGGATGC TCGAACTGCACCTCATGTGC ATGTTATGGTTGAGCTGGTA GCAGAACTCGAAGGCATTCA GTACGGTCGTAGTGGTGAGA 600

601 CACTTGGTGTCTTGTCCCT CATGTGGGCGAAATACCAGT GGCTTACC CGCAAGGTTCTTC TTCGTAAGAACGGTAATAAA GGAGCTGGTGCCATAGTTA 700

701 CGCGGCCGATCTAAAGTCAT TTGACTTAGGCGACGAGCTT GGCACTGATCCTTATGAAGA TTTTCAAGAAAACCTGGAACA CTA AACATAGCAGTGGTGTT 800

801 ACCCGTGAACCTATGCGTGA GCTTAACGGAGGGGCATACA CTCGCTATGTCGATAACAAC TTCTGTGGCCCTGATGGCTA CCCTCTTGAGTGCATTAAAG 900

901 ACCTTCTAGCACGTGCTGGT AAAGCTTATGCACTTTGTTC CGAACAACCTGGACTTIATTG AACTAAGAGGGGTGTATAC TGCTGCCGTGAACATGAGCA 1000

1001 TGA AATGTGTTGGTACACGG AACGTTCTGAAAGAGCTAT GAATGTCAGACACCTTTTGA AATTAAATTGGCAAAGAAAT TTGACATCTTCAATGGGGAA 1100

1101 TGTCCAAATTTTGATTTC CTTAAATTCATAATCAAGA CTATTC AACCAGGGTTGAA AAGAAAAAGCTTGATGGCTT TATGGGTAGAATTCGATCTG 1200

1201 TCTATCCAGTGTGCTACCA AATGAATGCAACCAAAATGTG CCTTCAACTCTCATGAAGT GTGATCAITGTGTGAAACT TCATGGCAGACGGGCGATT 1300

1301 TGTTAAAGCCACTTGCGAAT TTTGTGGCACTGAGAATTG ACTAAGAAGGTGCCACTAC TTGTGGTTACTIACCCCAA ATGCTGTTGTTAAATTAT 1400

1401 TGTCCAGCATGTTACAATTC AGAAGTAGGACCTGAGCATA GTCTTGCCGAATACCATAAT GAATCTGGCTTGA AACCAT TCTTCGTAAGGGTGGTCGA 1500

1501 CTATTGCCTTTGAGGCGTGT GTGTCTCTTATGTGGTGT CCATAACAAGTGTGCTTTT GGGTTCACGTGTAGCGCT AACATAGGTGTGAACCATA 1600

1601 AGGTGTTGTGGAGAAGGTT CCGAAGGTCTAATGACAAC CTCTTGAAATACTCCAAAA AGAGAAAGTCAACATCAATA TTGTTGGTGACTTTAAACTT 1700

1701 AATGAAGAGATCGCATTAT TTTGGCATCTTTTCTGCTT CCACAAGTGCTTTTGTGGAA ACTGTTAAAGGTTTGGAATTA AAGCATTCAACAAATG 1800

1801 TTGAATCTGTGTTAATTTT AAAGTTACAAAGGAAAGC TAAAAAGGTGCCTGGAATA TTGGTGAACGAAATCAATA CTGAGTCTCTTTATGCATT 1900

1901 TGCATCAGAGGCTGCTCGTG TTGACAGTCAATTTTCTCC CGCACTCTTGAAACTGCTCA AAATCTGTGCGTGTTTAC AGAAGCCGCTATAACAATA 2000

2001 CTAGATGGAATTCACAGTA TTA CTAGAGACTAATTGATG CTATGATGTCACATCTGAT TTGGCTACTAACAATCTAGT TGTAATGGCTACATTACAG 2100

2101 GTGGTGTGTCTCAGTTGACT TCGCAGTGGCTAACTAACAT CTTGGCACTGTTTATGAAA AACTCAACCCGTCCTTGAT TGGCTGAAAGAGAAGTTAA 2200

2201 GGAAGGTGTAGAGTTTCTTA GAGACGGTTGGAAATGTT AAATTTATCTCAACCTGTGC TTGTGAAATTGTCGGTGGAC AAATGTACCTGTGCAAAG 2300

2301 GAAATTAAGGAGAGTGTICA GACATTCTTAAAGCTGTAA ATAAATTTTGGCTTGTGT GCTGACTCTATCATTATTGG TGGAGCTAAACTTAAAGCCT 2400

2401 TGAATTTAGGTGAACATTT GTACCGCACTCAAAGGGATT GTACAGAAAGTGTGTTAAAT CCAGAGAAGAACTGGCCTA CTCATGCCTCTAAAAGCCCC 2500

2501 AAAAGAAATATCTTCTTAG AGGGAGAAACACTTCCACCA GAAGTGTTAACAGAGGAAGT TGTCTTGAAAACCTGGTGATT TACAACCATTAGAACAACT 2600

2601 ACTAGTGAAGCTGTGAAGC TCCATTGGTTGGTACACCAG TTTGTATTACGGGCTTATG TTGCTCGAAATCAAAGACAC AGAAAAGTACTGTGCCCTTG 2700

2701 CACCTAATATGATGGTAACA AACAAATACCTTCACACTCAA AGGCGGTGCACCAACAAGG TTACTTTTGGTGATGACACT GTGATAGAAGTGCAAGGTTA 2800

2801 CAAGAGTGTGAATATCACTT TTGAACCTTGATGAAGGATT GATAAGTACTTAATAGAA GTGCTCTGCCTATACAGTTG AACTCGGTACAGAAGTAAAT 2900

2901 GAGTTCCGCTGTGTGTGGC AGATGCTGTCAATAAAACCTT TGCAACCAGTATCTGAATTA CTTACACCACTGGGCATTGA TTAGATGAGTGGAGTATGG 3000

3001 CTACATACTACTATTTGAT GAGTCTGTTGAGTTTAAAT GGCTTCACATATGTATTGTT CTTTTACCTCCAGATGAG GATGAAGAAGAAGTGATTG 3100

3101 TGAAGAAGAAGAGTTTGAGC CATCAACTCAATATGAGTAT GGTACTGAAGATGATTACCA AGGTAAACCTTTGGAATTG GTGCCACTTCTGTGCTCTT 3200

3201 CAACCTGAAGAAGAGCAAGA AGAAGATTGGTIAGATGATG ATAGTCAACAAACTGTGGT CAACAAGACAGCAGTGAGGA CAATCAGACAACCTACTATT 3300

3301 AAACAATTGTGAGGTTCAA CCTCAATTAGAGATGGAACCT TACACCAGTTGTTCAGACTA TTGAAGTGAATAGTTTATG TGGTTATTTAAACTTACTGA 3400

3401 CAATGTATACATTA AAAATG CAGACATTGTGGAAGAAGCT AAAAGGTAAACCAACAGT GGTGTGTAATGACGCCAATG TTTACCTTAAACATGGAGGA 3500

3501 GGTGTGTGAGGAGCCTTAAA TAAGGCTACTAACAATGCCA TGCAAGTGAATCTGATGAT TACATAGCTACTAATGGACC ACTTAAAGTGGGTGGTAGTT 3600

3601 GTGTTTTAAGCGGACACAAT CTTGCTAAACACTGTCTTCA TGTGTGCGGCCAAATGTTA ACAAAGGTGAAGACATTCAA CTTCTTAAGAGTGCTTATGA 3700

3701 AAATTTAATCAGCAGCAAG TTCTACTTGCACCAATTATTA TCAGCTGTTATTTTGGTGC TGACCTATACATTCTTTAA GAGTTTGTGTAGATACTGTT 3800

3801 CGCACAAATGTCTACTTAGC TGTCTTGATAAAAATCTCT ATGACAAACTGTGTTCAAGC TTTTGGAAATGAAGAGTGA AAAGCAAGTTGAACAAAAGA 3900

3901 TCGCTGAGATTCTAAAGAG GAAGTTAAGCCATTIATAAC TGAAAGTAAACCTTCAGTTG AACAGAGAAAACAAGATGAT AAGAAAATCAAAGCTTGTGT 4000

4001 TGAAGAAGTTACAACAACCT TGAAGAATAAGTTCCTC ACAGAAAACCTGTIACTTTA TATTGACATTAATGGCAATC TTCATCCAGATTCTGCCACT 4100

4101 CTTGTTAGTGACATTGACAT CACTTTCTTAAAGAAAGATG CTCCATATATAGTGGGTGAT GTGTTC AAGAGGGTGT TTT AACTGCTGTGGTTATACCTA 4200

4201 CTA AAAAGGCTGGTGGCACT ACTGAAATGTAGCGAAAGC TTTGAGAAAAGTGCCAAACAG ACAATTATATAACCACTTAC CCGGGTCAGGGTTTAAATGG 4300

4301 TTACACTGTAGAGGAGGCAA AGACAGTGCTTAAAAAGTGT AAAAGTGCCCTTTTACATCT ACCATCTATATCTCTAATG AGAAGCAAGAAATCTTGGA 4400

4401 ACTGTTTCTGGAATTTGCG AGAAATGCTTGACATGCAG AAGAAACACGCAAAATTAATG CCTGTCTGTGTGGAACTAA AGCCATAGTTTCAACTATAC 4500

4501 AGCGTAAATATAAGGGTATT AAAATACAAGAGGGTGTGGT TGATTATGGTGCTAGATTTT ACTTTTACACCAGTAAACA ACTGTAGCGTCACTTATCAA 4600

4601 CACACTTAACGATCTAAATG AAACCTTTGTTACAATGCCA CTTGGCTATGTAACACATGG CTTAAATTTGGAAGAAGCTG CTCGGTATATGAGATCTCTC 4700

4701 AAAGTGCCAGCTACAGTTTC TGTTTCTTCACTGATGCTG TTACACGGTATAATGGTAT CTIACCTTCTTCTTAAAC ACCTGAAGAACATTTTATTG 4800

4801 AAACATCTCACTTGCTGGT TCCTATAAAGATTGGTCTTA TTCTGGACAATCTACACAAC TAGGTATAGAATTTCTTAAG AGAGGTGATAAAAGTGATA 4900

4901 TTACACTAGTAATCTACCA CATTCACCTAGATGGTGAA GTTATCACCTTTGACAATCT TAAGACACTTCTTCTTTGA GAGAAGTGAGGACTATTAAG 5000

5001 GTGTTTACAACAGTAGACAA CATTAACTCCACACGCAAG TGTGGACATGTCAATGACA TATGGACAACAGTTTGGTCC AACTTATTGGATGGAGCTG 5100

5101 ATGTTACTAAAATAAAACCT CATAATTCACATGAAGGTAA AACATTTTATGTTTACCTA ATGATGACACTCTACGTGTT GAGGCTTTTGAGTACTACCA 5200

5201 CACAACCTGATCTAGTTTTC TGGGTAGGTACATGTCAGCA TTAATCACACTAAAAAGTG GAAATACCCACAAGTTAATG GTTAACTTCTATTAATGG 5300

5301 GCAGATAACAAC TGTATCT TGGCACTGCATGTGAACAC TCCAACAAATAGAGTTGAAG TTTAATCCACCTGCTCTACA AGATGCTTATTACAGAGCAA 5400

5401 GGGCTGGTGAAGCTGCTAAC TTTTGTGCACTTATCTTAGC CTACTGTAATAAGACAGTAG GTGAGTTAGGTGATGTAGA GAAACAATGAGTTACTTGT 5500

5501 TCAACATGCCAATTAGATT CTTGCAAAAGAGCTTGAAC GTGGTGTGTA AAAACTTGTGG ACAACAGCAGACAACCCTTA AGGGTGTAAGCTGTTGTG 5600

5601 TACATGGGCACACTTCTTA TGAACAATTAAGAAAGGTG TTCAGATACCTGTACGTGT GGTAAACAAGCTACAAAATA TCTAGTACAACAGGAGTCAC 5700

5701 CTTTGTGTATGATGCAGCA CCACCTGCTCAGTATGAAC TAAAGCATGGTACATTACTT GTGCTAGTGAGTACACTGGT AATTACCAGTGTGGTCACTA 5800

5801 TAAACATATAACTTCTAAAG AAACCTTGTATTGCATAGAC GGTGCTTTACTTACAAAGTC CTCAGAATACAAAGTCTTA TTACGGATGTTTTCTACAAA 5900

5901 GAAAACAGTTACACAACAAC CATAAAACCAGTTACTTATA AATTGGATGGTGTGTTTGT ACAGAAATTGACCCTAAGTT GGACAATTATTATAAGAAAG 6000

6001 ACAATTCCTATTTCACAGAG CAACCAATTGATCTGTACC AAACCAACCATATCCAAACG CAAGCTTCGATAATTTTAAG TTTGTATGTGATAATATCAA 6100

6101 ATTTGCTGATGATTTAAACC AGTTAACTGGTTATAAGAAA CTTGCTTCAAGAGAGCTTAA AGTTACATTTTCCCTGACT TAAATGGTGATGTGGTGGCT 6200

6201 ATTGATTATAAACACTACAC ACCCTCTTTTAAGAAAGGAG CTAATTTGTTACATAAACCT ATTGTTGGCATGTTAACAA TGCAACTAATAAAGCCACGT 6300

6301 ATAAACCAAAATACCTGGTGT ATACGTGTCTTTTGAGGAC AAAACCAAGTTGAAACATCAA ATTCGTTTGATGTACTGAAG TCAGAGGACGCGCAGGGAAT 6400

6401 GGATAATCTTGCCTGCGAAG ATCTAAACACAGTCTCTGAA GAAGTAGTGGAATTCCTAC CATAAGAAAGACGTTCTTG AGTGAATGTGAAACTACC 6500

6501 GAAGTTGTAGGAGACATTAT ACTTAAACCAGCAAATAATA GTTTAAAAATTACAGAAGAG GTTGCCACACAGATCTAAT GGCTGCTTATGTAGACAATT 6600

6601 CTAGTCTTACTATTAAGAAA CCTAATGAATTATCTAGAGT ATTAGGTTTGAAACCCCTTG CTACTCATGGTTTACTGCT GTTAATAGTGTCCCTTGGGA 6700

6701 TACTATAGCTAATTATGCTA AGCCTTTTCTTACAAAGTT GTTAGTACAAC TACTAACAT AGTTACACGGTGTAAACC GTGTTGTACTAATTATATG 6800

6801 CCTATTCTTCTTACTTTATT GCTACAATTGTGACTTTTA CTAGAAGTACAAATTCTAGA ATTAAGCATCTAGCCGAC TACTATAGCAAAGAATACTG 6900

6901 TTAAGAGTGTGCGTAAATT TGCTAGAGGCTTCATTAA TTAATTGAAGTCACTAATT TTTCTAACTGATAAATAIT ATAATTTGGTTTTTACTATT 7000

7001 AAGTGTTTGCCTAGGTCTT TAATCTACTCAACCGCTGCT TTAGGTGTTTTATGTCTAA TTAGGCATGCCTTCTTACT GTACTGGTTACAGAGAAGGC 7100

7101 TATTTGAAC TCTACTAATGT CACTATTGCAACCTACTGTA CTGGTTCTATACCTTGTAGT GTTGTCTTAGTGGTTTGA TTCTTAGACACCTATCCTT 7200

7201 CTTTGAAC TACTACAAATT ACCATTTCATCTTTTAAATG GAATTAACTGCTTTTGGCT TAGTTGCAGAGTGGTTTTG GCATATATTCTTTTACTAG 7300

7301 GTTTTCTTACTGACTTGGAT TGGCTGCAATCATGCAATTG TTTTTCAGCTATTGTCAGT ACATTTTATTAGTAATTCTT GGCTTAGTGGTTAATAATT 7400

7401 AATCTGTACAAATGGCCCC GATTTCAGCTATGGTTAGAA TGTACATCTCTTTTGCATCA TTTTATTATGCATGGAAGG TTATGTGATGTGTAGACG 7500

7501 GTTGTAAITCATCAACTTGT ATGATGTGTACAAACGTAA TAGAGCAACAAGAGTGAAT GTACAAC TATGTTAATGGT GTTGAAGGTCCTTTTATGT 7600

7601 CTATGCTAATGGAGGTAAG GCTTTTGCAACTACACAAT TGGAATTGTGTTAATTGTGA TACATTCTGTGCTGGTAGTA CATTATTAGTGATGAAGTT 7700

7701 GCGAGAGACTTGTCACTACA GTTTAAAGACCAATAAATC CTACTGACCAGCTTCTTAC ATCGTTGATAGTGTACAGT GAAGAATGGTTCCATCCATC 7800

7801 TTTACTTTGATAAGCTGGT CAAAAGACTTATGAAGACA TTCTCTCTCTATTTTGTTA ACTTAGACAACCTGAGAGCT AATAACACTAAAGGTTCAIT 7900

7901 GCCTATTAA TGTATTAGTTT TTGATGGTAAATCAAAATG GAAGAATCATCTGCAAAATC AGCGTCTGTTTACTACAGTC AGCTTATGTGTAACCTATA 8000

8001 CTGTACTAGATCAGGCATT AGTGTCTGATGTGGTGATA GTGCGGAAGTTGCAGTTAAA ATGTTTGA TGTCTACGTIAA TACGTTTTCATCAACTTTTA 8100

8101 ACGTACCAATGGA AAAA ACTC AAAACACTAGTTGCAACTGC AGAAGCTGAAC TGC AAAAGA ATGTGCTCTTAGACAATGTC TTATCTACTTTTATTCAGC 8200

8201 AGCTCGGCAAGGTTTGTG ATTGAGATGTAGAACTAAA GATGTTGTGAATGTCTTAA ATTGTACATCAATCTGACA TAGAAGTTACTGGCGATAGT 8300

8301 TGTAATAACTATA TGTCTAC CTATAACAAAGTTGAAAACA TGACACCCCGTGACCTTGGT GCTGTATGACTGTAGTGC GCGTCATAATTAATGCGCAGG 8400

8401 TAGCAAAAAGTCACAACATT GCTTTGATATGGAACGTTAA AGAATTCATGTCTATTGCTG AACAACTACGAAAAACAATA CGTAGTGTGCTAAAAAGAA 8500

8501 TAACTTACCTTTAAGTTGA CATGTGCAACTACTAGACAA GTTGTAATGTGTGAACAAC AAAGATAGCACTTAAGGGTG GTAAAATTGTTAATAATTGG 8600

8601 TTGAAGCAGTTAATTAAGT TACACTTGTGTTCTTTTTG TTGCTGCTATTTCTATTTA ATAACACCTGTTTATGTCAT GTCTAAACATACTGACTTTT 8700

8701 CAAGTGAATCATAGGATAC AAGGCTATTGATGGTGGTGT CACTCGTGACATAGCATCTA CAGATACTGTTTGTGCTAAC AAACATGCTGATTTTGACAC 8800

8801 ATGGTTTAGCCAGCGTGGTG GTAGTTTATACTAATGACAAA GCTTGCCCATGTATTGCTGC AGTCATAACAAGAGAAGTGG GTTTGTGCTGCTGGTTTG 8900

8901 CCTGGCAGCATATTACGCAC AACTAATGGTGACTTTTTGC ATTCTTACCTAGAGTTTTT AGTGACGTTGGTAACATCTG TTACACACCATCAAAACTTA 9000

9001 TAGAGTACACTGACTTTGCA ACATCAGCTTGTGTTTTGGC TGCTGAATGTACAATTTTA AAGATGCTTCTGGTAAGCCA GTACCATATTGTTATGATAC 9100

9101 CAATGTACTAGAAGGTTCTG TTGCTTATGAAAGTTTACGC CCTGACACACGTTATGTGCT CATGGATGGCTCTATTATTC AATTTCCTAACACCTACCTT 9200

9201 GAAGGTTCTGTAGAGTGGT AACAACTTTTGATTTCTGAGT ACTGTAGGCACGGCACTTGT GAAAGATCAGAAGCTGGTGT TTGTGTATCTACTAGTGGTA 9300

9301 GATGGGTACTTAACAATGAT TATTACAGATCTTACCAGG AGTTTCTGTGGTGTAGATG CTGTAAATTI ACTTACTAAT ATGTTTACACCACTAATICA 9400

9401 ACCTATTGGTGCTTTGGACA TATCAGCATCTATAGTAGCT GGTGTATTGTAGCTATCGT AGTAACATGCCTTGCTACT ATTTTATGAGGTTTAGAAGA 9500

9501 GCTTTTGTGTAATACAGTCA TGTAGTTGCTTTAATACTT TACTATTCTTATGTCATTG ACTGTACTCTGTTAACACC AGTTTACTCAITCTTACCTG 9600

9601 GTGTTTATTTCTGTAATTAC TTGACTTGACATTTTATCT TACTAATGATGTTTCTTTT TAGCACATATTCAGTGGATG GTTATGTTACACCTTTAGT 9700

9701 ACCTTTCTGGATAACAATTG CTTATATCAITTTGTAATTC ACAAAAGCAITTTCTAATGGTT CTTAGTAATTACCTAAAGA GACGTGTAGTCTTAAATGGT 9800

9801 GTTTCCTTTAGTACTTTTGA AGAAGCTGCGCTGTGCACCT TTTTGTAAATAAAGAAATG TATCTAAAGTTGCGTAGTGA TGTGCTATTACCTCTTACGC 9900

9901 AATATAATAGATACTTAGCT CTTTATAATAAGTACAAGTA TTTTAGTGAGCAATGGATA CAACTAGCTACAGAGAAGCT GCTTGTGTCATCTCGCAAA 10000

10001 GGCTCTCAATGACTTCAGTA ACTCAGGTCTGATGTTCTT TACCAACCAACCAAAACCTC TATCACCTCAGCTGTTTTGC AGAGTGGTTTTAGAAAAATG 10100

10101 GCATTCCTATCTGTTAAAGT TGAGGGTTGTATGTACAAG TAACTTGGTGTACAAC TTAACGGTCTTTGGCTTGA TGACGTAGTTTACTGTCCAA 10200

10201 GACATGTGATCTGCACCTCT GAAGACATGCTTAACCCCTAA TTATGAAGATTACTCATTC GTAAGTCTAATCATAATTTC TTGGTACAGGCTGGTAATGT 10300

10301 TCAACTCAGGGTTATTGGAC ATTCTATGCAAAATGTGTGA CTAAAGCTTAAGTTGATAC AGCCAATCCTAAGACACCTA AGTATAAGTTTGTTCGCATT 10400

10401 CAACCAAGGACAGACTTTTTC AGTGTAGCTGTGTACAATG GTTACCATCTGGTGTTCAT CAATGTGCTATGAGGCCCAA TTTCACTATTAAAGGTTTAT 10500

10501 TCCTTAATGGTTCAATGGT AGTGTGGTTTTAACATAGA TTATGACTGTGTCTTTTTT GTTACATGCACCATATGGAA TTACCAACTGGAGTTTATGC 10600

10601 TGGCACAGACTTAGAAGGTA ACTTTTATGACCTTTTGT GACAGGCAAAACAGACAAGC AGCTGTACGACACAACTA TTACAGTTAATGTTTATGCT 10700

---

10701 TGGTTGTACGCTGCTGTTAT AAAAGGAGACAGGTGGTTTC TCAATCGATTACCACAACCT CTAAATGACTTTAACCTTGT GGCTATGAAGTACAATTATG 10800

10801 AACCTCTAACACAAGACCATT GTTGACATACTAGGACCTCT TCTGCTCAAACCTGGAATTG CCGTTTGTAGATATGTGTCT TCATTAAAAAGAATTACTGCA 10900

10901 AAATGGTATGAATGGACGTA CCAATATGGGTAGTGCTTTA TTAGAAGATGAATTTACACC TTTTGATGTTGTAGACAAT GCTCAGGTGTTACTTTCCAA 11000

11001 AGTGCAGTGAAGAACAAT CAAGGGTACACACCACCTGGT TGTACTACACAATTTGACT TCACCTTTAGTTTATGTTCA GAGTACTCAATGGTCTTTGT 11100

11101 TCTTTTTTTGTATGAAAAAT GCCTTTTACCTTTTGCTAT GGGTATATGCTATGTCTG CTTTTGCAATGATGTTGTC AAACATAAGCATGCATTCT 11200

11201 CTGTTTGTGTTTGTACCTT CTCTGGCACTGTAGCTTAT TTAAATATGGTCTATATGCC TGCTAGTGGGTGATGCGTA TTATGACATGGTGGATATG 11300

11301 GTTGATACTAGTTGTCTGG TTTTAAAGCTAAAGACTGTG TTATGTATGCATCAGCTGTA GTGTACTAATCCTTATGAC AGCAAGAAGTGTGTATGATG 11400

11401 ATGGTGCTAGGAGAGTGTGG ACACCTATGAATGCTTGTAC ACTCGTTTATAAAGTTTATT ATGGAATGCTTTAGATCAA GCCATTCCATGTGGCTCT 11500

11501 TATAATCTCTGTTACTTCTA ACTACTCAGGTGTAGTTACA ACTGTCATGTTTTTGCCAG AGGTATGTTTTTATGTGTG TTGAGTATTGCCCTATTTTC 11600

11601 TTCATACTGGTAATACACT TCAGTGATAATGCTAGTTT ATTGTTCTTAGGCTATTTT TGTACTTGTACTTTGGCCT CTTTGTGTTACTCAACCGCT 11700

11701 ACTTTAGACTGACTCTGGT GTTTATGATTACTTAGTTTC TACACAGGAGTTTAGATATA TGAATTCACAGGGACTACTC CCACCAAGAATAGCATAGA 11800

11801 TGCCTTCAAACCTAACATTA AATTGTTGGGTGTGGTGGC AAACCTTGATCAAAAGTAGC CACTGTACAGTCTAAAATGT CAGATGTAAGATGCACATCA 11900

11901 GTAGTCTTACTCTCAGTTT GCAACAACCTCAGAGTAGAAT CATTATCTAAATTGTGGGCT CAATGTGTCCAGTTACACAA TGACATTCTCTTAGCTAAAG 12000

12001 ATACTACTGAAGCCTTTGAA AAAATGGTTTCACTACTTTC TGTTTGTCTTCCATGCAGG GTGCTGTAGACATAAACAAG CTTTGTGAAGAATGCTGGA 12100

12101 CAACAGGGCAACCTTACAAG CTATAGCCTCAGAGTTTGT TCCCTTCCATCATATGCAGC TTTTGCTACTGCTCAAGAAG CTATGAGCAGGCTGTGTCT 12200

12201 AATGGTGATTCTGAAGTTGT TCTTAAAAAGTTGAAGAAGT CTTTGAATGTGGCTAAATCT GAATTGACCGTGATGCAGC CATGCAACGTAAGTTGGAAA 12300

12301 AGATGGCTGATCAAGCTATG ACCCAATGTATAAACAGGC TAGATCTGAGGACAAGAGGG CAAAAGTTACTAGTGCTATG CAGACAATGCTTTTCACTAT 12400

12401 GCTTAGAAAGTTGGATAATG ATGCACTCAACAACATTATC AACAAATGCAAGAGATGGTGT TGTTCCTTGAACATAATAC CTCTTACAACAGCAGCCAAA 12500

12501 CTAATGGTTGTATACCAGA CTATAACACATATAAAAATA CGTGATGATGTACAACATTT ACTTATGCATCAGCATTGTG GGAATCCAACAGGTTGTAG 12600

12601 ATGCAGATAGTAAATTTGTT CAACTTAGTGAAATTAGTAT GGACAATTCACCTAATTTAG CATGGCTCTTATTGTAACA GCTTTAAGGGCCAATTCTGC 12700

12701 TGTCAAATTACAGAATAATG AGCTTAGTCTGTTGCACTA CGACAGATGTCTTGTGCTGC CGGTACTACACAACTGCTT GCAGTATGACAATGCGTTA 12800

12801 GCTTACTACAACAACAAAA GGGAGGTAGGTTGTACTTG CACTGTATCCGATTACAG GATTGAAATGGGCTAGATT CCCTAAGAGTGATGGAAGTG 12900

12901 GTACTATCTATACAGAAGTG GAACCACCTGTAGGTTTGT TACAGACACACCTAAAGGTC CTAAGTGAAGTATTATAC TTTATTAAGGATTAAACAA 13000

13001 CCTAAATAGAGGTATGTGAC TTGTAGTTTGTAGTGCACA GTACGCTTACAAGCTGTGTA TGCAACAGAAGTGCCTGCCA ATTCAACTGTATTATCTTTC 13100

13101 TGTGCTTTGTGTAGATGC TGCTAAAGCTTACAAGATT ATCTAGCTAGTGGGGGACAA CCAATCACTAATTGTGTAA GATGTTGTGTACACACTG 13200

13201 GTACTGGTCAGGCAATAACA GTTACACCGGAAGCCAATAT GGATCAAGAATCCTTTGGTG GTGCATCGTGTGTCTGTAC TGCCGTTGCCACATAGATCA 13300

13301 TCCAATCTCTAAAGGATTTT GTGACTTAAAGGTAAGTAT GTACAATACCTACAACCTTG TGCTAATGACCTGTGGTTT TTACACTTAAAAACACAGTC 13400

13401 TGTACCGTCTCGGGTATGTG GAAAGGTTATGGCTGTAGTT GTGATCAACTCCGGAACCC ATGCTTCACTCAGCTGATGC ACAATCGTTTTTAAACGGGT 13500

13501 TTGCGGTGTAAGTGACGCC GTCTTACACCGTGGCGACA GGCCTAGTACTGATGTCGT ATACAGGCTTTTGACATCT ACAATGATAAAGTAGCTGGT 13600

13601 TTTGCTAAATTCCTAAAAAC TAATGTTGTGCTCTTCAAG AAAAGGACGAAGATGACAAT TTAATTGATTCTTACTTTGT AGTTAAGAGACACTTTCT 13700

13701 CTAACCTACCAACATGAAGAA ACAATTATAATTTACTTAA GGAATGTCCAGCTGTGCTA AACATGACTTCTTAAAGTT AGAATAGACGGTGACATGGT 13800

13801 ACCACATATATCAGCTCAAC GTCTTACTAAATACACAATG GCAGACCTCGTCTATGCTTT AAGCATTTTGATGAAGGTA ATTGTACACATTTAAAGAA 13900

13901 ATACTTGTACATACAATTG TTGTATGATGATTATTCTA ATAAAAGGACTGGTATGAT TTTGTAGAAAACCCAGATAT ATTACGGTATACGCCAACT 14000

14001 TAGGTGAACGTGACGCCAA GCTTTGTTAAAAACAGTACA ATTCTGTATGCCATGCGAA ATGCTGTGATTGTTGGTGA CTGACATTAGATAATCAAGA 14100

14101 TCTCAATGGTAACTGGTATG ATTTCCGTGATTTCATACAA ACCACGCCAGGTAGTGGAGT TCCTGTTGTAGATTCTTATT ATTCAATTGTTAATGCCTATA 14200

14201 TTAACCTTGACAGGGGCTTT AACTGCAGAGTCAATGTTG ACAGTCACTTAACAAAGCCT TACATTAAAGTGGGATTGTT AAAATATGACTTCACGGAAG 14300

14301 AGAGGTTAAACCTTTTGAC CGTTATTTAAATATTGGGA TCAGACATACCACCAAATT GTGTTAACTGTTTGGATGAC AGATGCATTCTGCATTGTGC 14400

14401 AAACCTTAATGTTTATCT CTACAGTGTCCCACTTACA AGTTTGGACCACTAGTGAG AAAAATATTGTTGATGGTG TTCCATTGTAGTTTCAACT 14500

14501 GGATACCACTTACAGAGCT AGGTGTTGATACATAATCAGG ATGTAACCTACATAGCTCT AGACTTAGTTTTAAGGAATT ACTTGTGTATGCTGCTGACC 14600

14601 CTGCTATGCACGCTGCTTCT GGTAATCTATTACTAGATAA ACGCACTACGTGCTTTTCTAG TAGCTGCACTTACTAACAAT GTTGCTTTTCAAACCTGCAA 14700

14701 ACCCGGTAATTTTAAACAAG ACTTCTATGACTTTGTCTGT TCTAAGGGTTTCTTAAAGGA AGGAAGTCTGTGAATTAA AACACTTCTCTTTGCTCAG 14800

14801 GATGGAATGCTGCTATCAG CGATTATGACTACTATCGTT ATAATCTACCAACAATGTGT GATATCAGACAACCTACTATT TGTAGTTGAAGTTGTGATA 14900

14901 AGTACTTTGATTGTTACGAT GGTGGCTGTATTATGCTAA CCAAGTCATCGTCAACAACC TAGACAAATCAGCTGGTTT CCATTTAATAAATGGGGTAA 15000

15001 GGCTAGACTTTATTATGATT CAATGAGTTATGAGGATCAA GATGCACTTTTCGCATATAC AAAACGTAATGTCATCCCTA CTATAACTCAAATGAATCAT 15100

15101 AAGTATGCCATTAGTGCAA GAATAGAGCTCGCACCTAG CTGGTGCTCTATCTGTAGT ACTATGACCAATAGACAGTT TCATCAAAAATTATTGAAAT 15200

15201 CAATAGCCGCCACTAGAGGA GCTACTGTAGTAATTGGAAC AAGCAAATCTATGGTGGTT GGCACAACATGTTAAAACT GTTTATAGTGATGTAGAAAA 15300

15301 CCTTCACTTATGGGTGGG ATTATCTAAATGTGATAGA GCCATGCCTTACATGCTTAG AATTATGGCCTCACTGTTC TTGCTCGAAACATACAAACG 15400

15401 TGTGTAGTGTGTACACCGG TTTCTATAGATTAGCTAATG AGTGTGCTCAAGTATTGAGT GAAATGGTCATGTGTGGCGG TTCATATATGTTAAACCAG 15500

15501 GTGGAACCTCATCAGGAGAT GCCACAACCTGCTTATGTAA TAGTGTTTTAACATTGTG AAGTGTACGCGCAATGTT AATGCACCTTTTACTACTGA 15600

15601 TGGTAACAAAATTGCCGATA AGTATGTCCGCAATTACAA CACAGACTTTATGAGTGTCT CTATAGAAATAGAGATGTTG ACACAGACTTTTGAATGAG 15700

15701 TTTTACGCATATTTCGTAA ACATTCTCAATGATGATAC TCTCTGACGATGCTGTTGTG TGTTCATAGCACTTATGC ATCTCAAGTCTAGTGGCTA 15800

15801 GCATAAAGAACTTTAAGTCA GTTCTTTATTAATCAAAACAA TGTTTTATGCTGTAGCAA AATGTTGACTGAGACTGAC CTTACTAAAGGACCTCATGA 15900

15901 ATTTGTCTCTAACATACAA TGCTAGTTAAACAGGGTGAT GATTATGTGTACCTTCCTTA CCCAGATCCATCAAGAATCC TAGGGCCCGGCTGTTTTGTA 16000

16001 GATGATATCGTAAAAACAGA TGTACACTTATGATTGAAC GGTTCGTCTTTAGCTATA GATGCTTACCACTTACTAA ACATCTAATCAGGAGTATG 16100



16101 CTGATGCTCTTCATTGTGAC TTACAATACATAAGAAAGCT ACATGATGAGTTAACAGGAC ACATGTTAGACATGTATTCT GTTATGCTTACTAATGATAA 16200

16201 CACTTCAAGGTATTGGGAAC CTGAGTTTTATGAGGCTATG TACACACCGCATACAGTCTT ACAGGCTGTGGGGCTGTG TTCCTTGCAATTCACAGACT 16300

16301 TCATTAAGATGTGGTGCTTG CATACGTAGACCATCTTAT GTTGAAATGCTGTTACGAC CATGTCATATCAACATCACA TAAATTAGTCTTGCTGTGA 16400

16401 ATCCGTATGTTTGAATGCT CCAGGTTGTGATGTCAGA TGTGACTCAACTTTACTTAG GAGGTATGAGCTATTATTGT AAATCACATAAACCACCCAT 16500

16501 TAGTTTTCCATIGTGTGCTA ATGGACAAGTTTTIGGTTTA TATAAAAATACATGTTGG TAGCGATAATGTIACGACT TTAATGCAATTGCAACATGT 16600

16601 GACTGGACAAATGCTGGTGA TTACATTTTACGTAACACCT GTACTGAAAGACTCAAGCTT TTGACAGCAGAAACGCTCAA AGCTACTGAGGAGACATTTA 16700

16701 AACTGTCTTATGGTATTGCT ACTGTACGTGAAGTGCTGTC TGACAGAGAATTACATCTTT CATGGGAAGTTGGTAAACCT AGACCACCACTTAACCGAAA 16800

16801 TTATGTCTTACTGGTTATC GTGTAATAAAAAAGTAAAT GTACAAATAGGAGAGTACAC CTTGAAAAAGGTGACTATG GTGATGCTGTTGTTTACCGA 16900

16901 GGTACAACTTACAAATT AAATGTTGGTGATTATTTG TGCTGACATCAGATACAGTA ATGCCATTAAGTGCACCTAC ACTAGTCCACAAGAGCACT 17000

17001 ATGTTAGAACTTACTGGCTTA TACCAACACTCAATATCTC AGATGAGTTTTCTAGCAATG TTGCAAAATATCAAAGGTT GGTATGCAAAAGTATTCTAC 17100

17101 ACTCCAGGACCACCTGGTA CTGGTAAGAGTCATTTGCT ATTGGCTAGCTCTCCACTA CCCTTCTGCTCGCATAGTGT ATACAGCTTGCTCTCATGCC 17200

17201 GCTGTGATGCACTATGTGA GAAGGCATTAAAAATTGTC CTATAGATAAATGTAGTAGA ATTATACCTGCACGTGCTCG TGTAGAGTGTGTTGATAAAT 17300

17301 TCAAAGTGAATTCAACATTA GAACAGTATGCTTTTGTC TGTAATGCAATTGCGTGAGA CGACAGCAGATATAGTTGTC TTTGATGAAATTCATGGC 17400

17401 CACAAATTATGATTGAGTG TTGTCATAGCCAGATTACGT GCTAAGCACTATGTGTACAT TGGCGACCTGCTCAATTAC CTACACCAGCACATTGCTA 17500

17501 ACTAAGGCACACTAGAAC AGAATATTCAATTAGTGT GTAGACTTATGAAAACTATA GGTCCAGACATGTTCTCGG AACTGTCTGCGTTGCTCTG 17600

17601 CTGAAATGTTGACACTGTG ATGTCCTTGGTTTATGATAA TAAGCTTAAAGCACATAAAG ACAATCAGCTCAATGCTTT AAAATGTTTATAAGGGTGT 17700

17701 TATCACGATGATGTTTCAT CTGCAATTAACAGGCCACAA ATAGCGCTGGTAAGAGAATT CCTTACACGTAACCTGCTT GGAGAAAAGCTGTCTTTATT 17800

17801 TCACCTTATAATTACAGAA TGCTGTAGCTCAAGATTG TGGGACTACCAACTCAAAC TGTGATTATCACAGGGCTC AGAATATGACTATGTCATAT 17900

17901 TCACCTAAACCATAAGAA GCTCACTCTGTAAATGTAAA CAGATTAAATGTGTCTAATA CCAGAGCAAAAGTAGGCATA CTTTGCATAATGCTGTAGAT 18000

18001 AGACCTTTATGACAAGTGC AATTTACAAGTCTTGAAAT CCACGTAGGAATGTGGCAAC TTTACAAGCTGAAAAATGTA CAGGACTCTTAAAGATTGT 18100

18101 AGTAAGGTAATCACTGGGTT ACATCTACACAGGCACCTA CACACCTCAGTTTGACACT AAATTCAAACTGAAGGTTT ATGTGTGACATACCTGGCA 18200

18201 TACCTAAGGACATGACCTAT AGAAGACTCATCTCTATGAT GGGTTTTAAATGAATTATC AAGTTAATGTTACCTAAC ATGTTTATCACCCGCGAAGA 18300

18301 AGCTATAAGACATGTACGTG CATGGATTGGCTTCGATGTC GAGGGGTGTCATGCTACTAG AGAAGCTGTGGTACCAATT TACCTTACAGCTAGGTTTT 18400

18401 TCTACAGGTGTAACCTAGT TGCTGTACCTACAGGTTATG TTGATACCTAATAATACA GATTTTCCAGAGTTGGTGC TAAACCACCGCTGGAGATC 18500

18501 AATTTAAACACCTCATACCA CTATGATGCAAAAGGACTTCC TTGGAATGTAGTGGTATAA AGATTGTACAAATGTTAAGT GACACACTTAAAAATCTCTC 18600

18601 TGACAGAGTCGTAATTGTCT TATGGGCACATGGCTTGAG TTGACATCTATGAAGTATT TGTGAAAATAGGACCTGAGC GCACCTGTGTCTATGTGAT 18700

18701 AGACGTGCCACATGCTTTTC CACTGCTCAGACACTTATG CCTGTGGCATCATCTATT GGATTGATTACGCTATAA TCCGTTTATGATTGATGTC 18800

18801 AACAAATGGGGTTTACAGGT AACCTACAAGCAACCATGA TCTGTAATTGCAAGTCCATG GTAATGCACATGTAGTAGT TGTGATGCAATCATGACTAG 18900

18901 GTGTCTAGCTGCCACGAGT GCTTTGTTAAGCGTGTGAC TGGACTAATTGAATATCTAT AATGGTGATGAAGTGAAGA TTAATCGGCTTGTAAGAAAG 19000

19001 GTTCAACACATGGTTGTIAA AGTGCATTATTAGCAGACA AATCCCAGTCTTTCACGAC ATTGGTAACCTAAAGCTAT TAAGTGTGACCTCAAGCTG 19100

19101 ATGTAGAATGGAAGTCTAT GATGCACAGCCTTGATGTA CAAAGCTTATAAATAGAAG AATTATTCTATTCTTATGCC ACACATTCTGACAAATTCAC 19200

19201 AGATGGTGTATGCCTATTTT GGAATTGCAATGTCGATAGA TATCCTGCTAATCCATTGT TTGTAGATTGACACTAGAG TGCTATCTAACCTTAACCTT 19300

19301 CCTGGTTGTGATGGTGGCAG TTTGTATGTAAATAACATG CATTCACACACCAGCTTTT GATAAAGTGCTTTTGTTAA TTTAAACAATTACCAATTT 19400

19401 TCTATTACTCTGACAGTCCA TGTGAGTCTCATGAAAAACA AGTAGTGCAGATATAGATT ATGTACCACTAAAGTCTGCT ACGTGATAACAGTTGCAA 19500

19501 TTIAGTGGTGTCTGTCTGTA GACATCATGCTAATGAGTAC AGATTGTATCTCGATGCTTA TAACATGATGATCTCAGCTG CTTTAGCTTGTTGGGTTAC 19600

19601 AAACAATTGATACTTATAA CCTCTGGAACACTTTTACAA GACTTCAGAGTTTAGAAAAAT GTGGCTTTAATGTGTGAAA TAAGGGACACTTTGATGGAC 19700

19701 AACAGGGTGAAGTACCAGTT TCTATCATTAATAACACTGT TTACACAAAAGTTGATGGTG TTGATGTAGAATTGTTTGAA AATAAAACAACATTACCTGT 19800

19801 TAATGTAGCAATTGAGCTTT GGGCTAAGCGCAACATTA AAGTACCAGAGGTGAAAAAT ACTCAATAATTGGGTGTGG ACATTGCTGCTAATACTGTG 19900

19901 ATCTGGGACTACAAAAGAGA TGCTCCAGCAGATATATCTA CTATTGGTGTGTTCTATG ACTGACATAGCCAAGAAACC AACTGAAACGATTGTGCAC 20000

20001 CACTCACTGTCTTTTIGAT GGTAGAGTTGATGGTCAAGT AGACTTATTAGAAATGCCG GTAATGGTGTCTTATTACA GAAGGTAGTGTAAAGGTTT 20100

20101 ACAACCATCTGTAGGTCCCA AACAAGCTAGTCTTAATGGA GTCACATTAATTGGAGAAGC CGTAAAAACACAGTCAATT ATTATAAGAAAGTTGATGGT 20200

20201 GTTGTTCAACAATTACCTGA AACTTACTTTACTCAGAGTA GAAATTTACAAGAATTTAAA CCCAGGAGTCAATGGAAT TGATTTCTTGAATTAGCTA 20300

20301 TGGATGAATTCATTGAACGG TATAAATTAGAAGGCTATGC CTTCGAACATATCGTTTATG GAGATTTAGTCATAGTCAG TTAGTGGTTTACATCTACT 20400

20401 GATTGGACTAGCTAAACGTT TTAAGGAATCACCTTTTGAA TTAGAAGATTTATTCCTAT GGACAGTACAGTTAAAACT ATTTATAACAGATGCGCAA 20500

20501 ACAGGTTTACTAAGTGTGT GTGTTCTGTATTGATTAT TACTTGATGATTTTGTGAA ATAATAAATCCCAAGATT ATCTGTAGTTTCTAAGGTTG 20600

20601 TCAAAGTGACTATTGACTAT ACAGAAATTCATTATGCT TTGGTGTAAGATGGCCATG TAGAAACATTTIACCCAAAA TTACAATCTAGTCAAGCGTG 20700

20701 GCAACCGGGTGTGTATGCT CTAATCTTACAAAATGCAA AGAATGCTATTAGAAAAGTG TGACCTTCAAATATGGTG ATAGTGCAACATTACCTAAA 20800

20801 GGCATAATGATGAATGTCGC AAAATATACTCAACTGTGTC AATATTTAAACACATTAACA TTAGCTGTACCTATAATAT GAGAGTTATACATTTTGGTG 20900

20901 CTGGTCTGTATAAAGGAGTT GCACCAGGTACAGCTGTTT AAGACAGTGGTGCCTACGG GTACGCTGCTGTGCGATTCA GATCTTAATGACTTTGTCTC 21000

21001 TGATGCAGATTCAACTTTGA TTGGTGATTGTGCAACTGTA CATACAGCTAATAAATGGGA TCTCATATTAGTGATATGT ACGACCTTAAGACTAAAAAT 21100

21101 GTTACAAAAGAAATGACTC TAAAGAGGGTTTTTCACTT ACATTGTGGGTTTATACAA CAAAAGCTAGCTCTGGAGG TTCCGTGGCTATAAAGATAA 21200

21201 CAGAACATCTTGGAAATGCT GATCTTTATAAGCTCATGG ACACCTCGCATGGTGGACAG CCTTGTACTAATGTAAAT CGGTATCATCTGAAGCATT 21300

21301 TTTAATTGGATGTAATTATC TTGGCAAACACGCGCAACA ATAGATGGTATTGTATGCA TGCAAATTACATATTTGGA GGAATACAAATCCAATTAG 21400

21401 TTGCTCTCTATCTTTTATT TGACATGAGTAAATTTCCCC TTAAATTAAGGGGTACTGCT GTTATGCTTTTAAAGAAGG TCAAATCAATGATATGATT 21500

21501 TATCTCTTCTTAGTAAAGGT AGACTTATAATTAGAGAAAA CAACAGAGTTGTTATTCTA GTGATGTTCTTGTTAAACAAC TAAACGAACAATGTTGTTT 21600

21601 TTCTTGTTTTATTGCCACTA GACTCTAGTCAGTGTGTAA TCTTACAACCAAGAATCAAT TACCCCTGCATACACTAAT TCTTTCACAGTGGTGTTA 21700

21701 TTACCCTGACAAAGTTTCA GATCCTCAGTTTTACATCA ACTCAGGACTTGTCTTACC TTCTTTTCCAATGTACTT GGTTCATGCTATACATGC 21800

21801 TCTGGGACCAATGGTACTAA GAGGTTTGATAACCCGTCC TACCAITTAATGATGGTGT TATTTGCTTCCACTGAGAA GTCTAACATAATAAGAGGCT 21900

21901 GGATTTTGGTACTACTTGA GATTGAAGACCCAGTCCCT ACTTATTGTTAATAACGCTA CTAATGTTGTTAATAAAGTC TGTGAATTTCAATTTGTAA 22000

22001 TGATCCATTTTGGGTGTTT ATTACACAAAAACAACAAA AGTTGGATGAAAAGTGAGTT CAGAGTTTATTCTAGTGCGA ATAATTGCACTTTGAATAT 22100

22101 GTCTCTCAGCCTTTCTTAT GGACCTTGAAGGAAAACAGG GTAATTTCAAAAATCTTAGG GAATTTGTGTTAAGAATAT TGATGGTTATTTAAAAATAT 22200

22201 ATTCTAAGCACACGCTATT AATTAGTGCGTGATCTCCC TCAGGGTTTTTCGGCTTTAG AACCATTTGGTAGATTGCCA ATGGGTATTAACATCACTAG 22300

22301 GTTTCAAACTTTACTTGCTT TACATAGAAGTTATTGACT CTGGTGATCTTCTTTCAGG TTGGACAGCTGGTGTGCGA CTTATTATGTTGGGTATCTT 22400

22401 CAACCTAGGACTTTTCTATT AAAATATAATGAAAATGGAA CCATTACAGATGCTGTAGAC TGTGCACCTGACCCCTCTCTC AGAAACAAAGTGACGTTGA 22500

22501 AATCTTCACTGTAGAAAAA GGAATCTATCAAACTTCAA CTTAGAGTCCAACCAACAG AATCTATTGTTAGATTCTCT AATATTACAAACTTGTGCCC 22600

22601 TTTTGGTGAAGTTTTAACG CCACAGATTGCAATCTGTT TATGCTTGGAACAGGAAGAG AATCAGCAACTGTGTGCTG ATTATTCTGTCCTATATAAT 22700

22701 TCCGCATCATTTTCCACTTT TAAGTGTATGGAGTGTCTC CTACTAAATTAATGATCTC TGTCTTACTAATGTCTATGC AGATTCAATTGTAATTAGAG 22800

22801 GTGATGAAGTCAGACAAATC GCTCCAGGGCAAACCTGGAAA GATTGCTGATTATAATTATA AATTACCAGATGATTTTACA GGCTGCGTTATAGCTTGGA 22900

22901 TTCTAACAACTTGATTCTA AGGTGGTGGTAATTATAAT TACCTGTATAGATTGTTAG GAAGTCTAATCTCAAACCTT TTGAGAGAGATATTTCACT 23000

23001 GAAATCTATCAGGCCGGTAG CACACCTTGAATGGTGTG AAGGTTTAAATTGTACTTT CCTTACAATCATATGGTTT CCAACCCACTAATGGTGTG 23100

23101 GTTACCAACCATACAGAGTA GTAGTACTTCTTTTGAAC TCTACATGCACCAGCAACTG TTTGTGGACCTAAAAAGTCT ACTAATTTGGTIAAAAAACA 23200

23201 ATGTGTCAATTTCAACTTCA ATGGTTTAACAGGCACAGGT GTTCTTACTGAGTCTAACAA AAAGTTTTCGCTTTCCAAC AATTGGCAGAGACATTGCT 23300

23301 GACACTACTGATGCTGTCCG TGATCCACAGACACTTGAGA TTCTTGACATTACACCATGT TCTTTGGTGGTGTGCTGT TATAACACCAGGAACAAATA 23400

23401 CTTCTAACCAGGTGTCTGTT CTTTATCAGGTTGTTAACTG CACAGAAGTCCCTGTTGCTA TTCATGCAGATCAACTTACT CCTACTTGGCGTGTATTTC 23500

23501 TACAGGTTCTAATGTTTTTC AAACACGTGCAGGCTGTTA ATAGGGGCTGAACATGTCAA CAACTCATATGAGTGTGACA TACCCATTGGTGCAGGTATA 23600

23601 TCGCTAGTTATCAGACTCA GACTAATCTCTCTCGCGGG CACGTAGTGTAGCTAGTCAA TCCATCATTGCCTACACTAT GTCACTTGGTGCAGAAAATT 23700

23701 CAGTTGCTTACTCTAATAAC TCTATTGCCATACCCACAAA TTTTACTATTAGTGTIACCA CAGAAATCTACCAGTGTCT ATGACCAAGACATCAGTAGA 23800

23801 TTGTACAATGTACATTGTG GTGATTCAACTGAATGCAGC AATCTTTGTGTCAATATGG CAGTTTTGTACACAATTA ACCGTGCTTTAACTGGAATA 23900

23901 GCTGTTGAACAAGACAAAAA CACCAAGAAGTTTTGCAC AAGTCAAAACAATTTACAAA ACACCACCAATTAAGATT TGGTGGTTTTAATTTTTCAC 24000

24001 AAATATTACCAGATCCATCA AAACCAAGCAAGAGGTCATT TATTGAAGATCTACTTTTCA ACAAAGTGACACTTGCAGAT GCTGGCTTCATCAACAATA 24100

24101 TGGTGATTGCTTGGTGATA TTGCTGTAGAGACCTCATT TGTGCACAAAAGTTTAAACGG CCTTACTGTTTGGCACCTT TGCTACAGATGAAATGATT 24200

24201 GCTCAATACACTTCTGCACT GTIAGCGGTGACAATCACTT CTGGTGGACCTTTGGTGCA GGTGCTGCATTACAAATACC ATTTGCTATGCAAATGGCTT 24300

24301 ATAGGTTTAAATGGTATGGA GTTACACAGAATGTCTCTA TGAGAACCAAAAATGTATTG CCAACCAATTAATAGTGCT ATTGGCAAAATTCAAGACTC 24400

24401 ACTTCTTCCACAGCAAGTG CACTTGGAAAACCTTCAAGAT GTGGTCAACCAAAAATGCACA AGCTTTAAACACGCTTGTTA AACAACTTAGCTCCAATTTT 24500

24501 GGTGCAATTTCAAGTGTTT AAATGATATCCTTTACGTC TTGACAAAGTTGAGGCTGAA GTGCAAAATTGATAGGTTGAT CACAGGCAGACTTCAAAGTT 24600

24601 TGCAGACATATGACTCAA CAATTAATTAGAGTGCAGA AATCAGAGCTTCTGCTAATC TTGCTGCTACTAAAATGTCA GAGTGTGACTTGGACAATC 24700

24701 AAAAAGAGTTGATTTTGTG GAAAGGGCTATCATCTTATG TCTTCCCTCAGTCAGCACC TCAATGGTTAGTCTTCTGTC ATGTGACTTATGCTCCCTGCA 24800

24801 CAAGAAAAGAACTTCAACAC TGCTCTGCCATTGTCTATG ATGGAAAAGCACACTTTCTCT CGTGAAGGTGCTTTGTTTC AAATGGCACACACTGGTTTG 24900

24901 TAACACAAAGGAATTTTAT GAACCACAAATCAATTACTAC AGACAACACATTTGTGCTG GTAACCTGTGATGTTGTAATA GGAATTGTCAACAACACAGT 25000

25001 TTATGATCCTTTGCAACCTG AATTAGACTCATCAAGGAG GAGTTAGATAAATATTTTAA GAATCATACATCACCAGATG TTGATTAGGTGACATCTCT 25100

25101 GGCATTAAATGCTCAGTTGT AAACATTTCAAAAAGAAATTG ACCGCTCAATGAGGTGGCC AAGAATTTAAATGAATCTCT CATCGATCTCCAAGAACTTG 25200

25201 GAAAGTATGAGCAGTATATA AAATGGCCATGGTACATTG GCTAGGTTTATAGCTGGCT TGATTGCCATAGTAATGGTG ACAATTATGCTTGTCTGAT 25300

25301 GACCAGTTGCTGTAGTTGTC TCAAGGGCTGTTGTCTTGT GGATCTCTGCTCAAATTTGA TGAAGACGACTCTGAGCCAG TGCTCAAAGGAGTCAAATTA 25400

25401 CATTACACATAAACGAACTT ATGGATTGTTTATGAGAAT CTTACAATTGGAACGTGAA CTTTGAAGCAAGGTGAAATC AAGGATGCTACTCCTTCA 25500

25501 TTTTGTTCGGCTACTGCAA CGATACCGATACAAGCCTCA CTCCCTTTCGGATGGCTTAT TGTGCGGTGCACTTCTTG CTGTTTTTATAGCGCTTCC 25600

25601 AAAATCATAACCTTCAAAA GAGATGGCAACTAGCACTCT CCAAGGGTGTCACTTTGTT TGCAACTTGCTGTGTTGTT TGTAACAGTTTACTCACACC 25700

25701 TTTTGCTGTTGCTGCTGGC CTTGAAGCCCTTTTCTCTA TCTTATGCTTTAGTCTACT TCTGCAGAGTATAAACTTT GTAAGAATAATAATGAGGCT 25800

25801 TTGGCTTTGCTGGAATGCC GTTCAAAAACCCATTACTT TATGATGCCAACTATTTCTT TTGCTGGCATACTAATGTT ACGACTATTGTATACCTTAC 25900

25901 AATAGTGAACCTTCTCAAT TGTCAATTACTCAGGTGATG GCACAACAAGTCTTATTCT GAACATGACTACCAGATTGG TGGTTACTGAAAAATGGG 26000

26001 AATCTGGAGTAAAGACTGT GTTGTAATACAGTTTACTT CACTTCAGACTATTACCAGC TGTACTCAACTCAATTGAGT ACAGACACTGGTGTGAACA 26100

26101 TGTACCTTCTTCACTACA ATAAATTTGTGTAGAGCCT GAAGAACATGTCCAAATTA CACAATCGACGGTTCATCCG GAGTTGTTAATCCAGTAATG 26200

26201 GAACCAATTTATGATGAACC GACGACGACTACTAGCTGCG CTTTGAAGCACAAAGTGAT GAGTACGAAGTTATGTACTC ATTCGTTTCGGAAGAGACAG 26300

26301 GTACGTTAATAGTTAATAGC GTACTCTTTTTCTTGCTTT CGTGGTATTCTGCTAGTTA CACTAGCCATCTTACTGCG CTTGATTGTGTGCGTACTG 26400

26401 CTGCAATATTGTTAACGTGA GTCTGTGTAACCTTCTTTT TACGTTTACTCTGCTGTAA AAATCTGAATCTTCTAGAG TTCCTGATCTTCTGGTCTAA 26500

26501 ACGAACTAAATATTATATTA GTTTTCTGTTTGGAACTTT AATTTIAGCCATGGCAGATT CCAACGGTACTATTACCGTT GAAGAGCTTAAAAAGCTCCT 26600

26601 TGAACAATGGAACCTAGTAA TAGGTTTCTTATCTTACATA TGGATTGTCTTCTACAAAT TGCTATGCCAACAGGAATA GGTTTTGTATATAATTAAG 26700

26701 TTAATTTTCTCTGGCTGTT ATGCCAGTAACCTTAGCTT GTTTGTGCTTGTGCTGTTT TACAGAATAAATTGGATCAC CGGTGGAATTGCTATCGCAA 26800

26801 TGGCTTGTCTGTAGGCTTG ATGTGGCTCAGCTACTTCAT TGCTTCTTCAGACTGTTTG CGGTACGCGTTCATGTGG TCATTCAATCCAGAACTAA 26900

---

26901 CATTCTTCTCAACGTGCCAC TCCATGGCACTATTCTGACC AGACCGCTTCTAGAAAGTGA ACTCGTAATCGGAGCTGTGA TCCTTCGTGGACATCTTCGT 27000

27001 ATTGCTGGACACCATCTAGG ACGCTGTGACATCAAGGACC TGCCTAAAGAAATCACTGTT GCTACATCACGAACGCTTTC TTATTACAAATGGGAGCTT 27100

27101 CGCAGCGTGTAGCAGGTGAC TCAGGTTTTGCTGCATACAG TCGCTACAGGATTGGCAACT ATAAATTAAACACAGACCAT TCCAGTAGCAGTGACAATAT 27200

27201 TGCCTTGCTGTACAGTAAG TGACAACAGATGTTTCATCT CGTTGACTTTCAGGTTACTA TAGCAGAGATATTACTAATT ATTATGAGGACTTTTAAAGT 27300

27301 TTCCATTGGGAATCTTGATT ACATCATAAACCTCATAATT AAAAATTTATCTAAGTCACT AACTGAGAATAAATATTCTC AATTAGATGAAGAGCAACCA 27400

27401 ATGGAGATTGATIAAACGAA CATGAAAATTATCTTTTCT TGGCACTGATAACACTCGCT ACTTGTGAGCTTTATCACTA CCAAGAGTGTGTAGAGGTA 27500

27501 CAACAGTACTTTTAAAGAA CCTTGCTCTTCTGGAACATA CGAGGGCAATTCACCATTTT ATCCTCTAGCTGATAACAAA TTGCACTGACTTGCTTTAG 27600

27601 CACTCAATTTGCTTTTGCTT GTCTGACGGCGTAAACAC GTCTATCAGTTACGTGCCAG ATCAGTTTCACCTAACTGT TCATCAGACAAGAGGAAGTT 27700

27701 CAAGAACTTACTCTCCAAT TTTTCTTATTGTTGCGGCAA TAGTGTTTATAACACTTTGC TTCACACTCAAAGAAAAAC AGAATGATTGAACTTTCATT 27800

27801 AATTGACTTCTATTGTGCT TTTAGCCTTTCTGCTATTC CTGTGTTTAATTATGCTTAT TAICTTTTGGTTCTCACTTG AACTGCAAGATCATAATGAA 27900

27901 ACTTGTACGCGCTAAACGAA CATGAAATTTCTTGTTTTCT TAGGAATCATCACAACGTGA GCTGCATTTACCAAGAATG TAGTTTACAGTCATGTACTC 28000

28001 AACATCAACCATATGTAGTT GATGACCCGTGCTCATTCA CTCTATTCTAAATGGTATA TTAGAGTAGGAGCTAGAAAA TCAGCACCTTTAATTGAATT 28100

28101 GTGCGTGGATGAGGTTGGTT CTAATCACCCATTCACTAG ATCGATATCGGTAATTATAC AGTTTCCTGTTTACCTTTTA CAATTAATTGCCAGGAACCT 28200

28201 AAATTGGGTAGTCTTGTAGT GCGTGTGCTGCTTATGAAG ACTTTTATAGATATCATGAC GTTCGTGTTGTTTAGAATT CATCTAAACGAACAACTAA 28300

28301 AATGTCTGATAATGGACCCC AAAATCAGCGAAATGCACCC CGCATTCAGTTTGGTGGACC CTCAGATTCAACTGGCAGTA ACCAGAATGGAGAACGCAGT 28400

28401 GGGGCGCGATCAAAACAACG TCGGCCCAAGGTTTACCCA ATAATACTGCTCTTGTTGTC ACCGCTCTCACTCAACATGG CAAGGAAGACCTTAAATTCC 28500

28501 CTCGAGGACAAGGCGTTCCA ATTAACACCAATAGCAGTCC AGATGACCAAATTTGGTACT ACCGAAGAGCTACCAGACGA ATTCGTGGTGGTGACGGTAA 28600

28601 AATGAAGATCTCAGTCCAA GATGGTATTCTACTACCTA GGAAGTGGGCAGAAAGCTGG ACTTCCTATGGTGCTAACA AAGACGGCATCATATGGGTT 28700

28701 GCAACTGAGGGAGCCTTGAA TACACCAAAAGATCACATTG GCACCCGAATCTGCTAAC AATGCTGAATCGTGCTACA ACTTCCTCAAGGAACAACAT 28800

28801 TGCCAAAAGGCTTCTACGCA GAAGGGAGCAGAGGCGGAG TCAAGCCTCTGCTGCTTCT CATCACGTAGTCGCAACAGT TCAAGAAATCAACTCCAGG 28900

28901 CAGCAGTAGGGAACTTCTC CTGCTAGAATGGCTGGCAAT GCGCGTGATGCTGCTCTTGC TTTGCTGCTGCTTGACAGAT TGAACCACTTGAGAGCAA 29000

29001 ATGCTCTGTTAAAGGCCAACA ACAACAAGGCCAACTGTCA CTAAGAAATCTGCTGCTGAG GCTTCTAAGAAGCCTCGGCA AAAACGTACTGCCACTAAAG 29100

29101 CATACAATGTAACACAAGCT TTCGGCAGACGTGGTCCAGA ACAAAACCAAGGAAATTTTG GGGACCAGGAACTAATCAGA CAAGGAACTGATTACAAACA 29200

29201 TTGGCCGCAAAATGCACAA TTTGCCCCAGCGCTTCAGCG TTCTTCGGAATGTCGCGCAT TGGCATGGAAGTCACACCTT CGGGAACGTGGTTGACCTAC 29300

29301 ACAGGTGCCATCAAATTGGA TGACAAAGATCCAAATTTCA AAGATCAAGTCATTTTGCTG AATAAGCATATTGACGCATA CAAAACATTCCCACCAACAG 29400

29401 AGCCTAAAAAGGACAAAAAG AAGAAGGCTGATGAAACTCA AGCCTTACCGCAGAGACAGA AGAAACAGCAAACCTGTGACT CTTCTTCTGCTGCAGATTT 29500

29501 GGATGATTTCTCAAACAAT TGACAACAATCCATGAGCAGT GCTGACTCAACTCAGGCCTA AACTCATGCAGACCACACAA GGCAGATGGGCTATATAAAC 29600

29601 GTTTTCGCTTTTTCGTTTAC GATATATAGTCTACTCTTGT GCAGAATGAATTTCTGTAAC TACATAGCACAAGTAGAATG AGTTAACTTTAATCTCATAT 29700

29701 AGCAATCTTTAATCAGTGTG TAACATTAGGGAGGACTTGA AAGAGCCACCACATTTTTCAC CGAGGCCACGCGAGTACGA TCGAGTGTACAGTGAACAAT 29800

29801 GCTAGGGAGAGCTGCCTATA TGAAGAGCCCTAATGTGTA AAATTAATTTTAGTAGTGCT ATCCCCATGTGATTTTAATA GCTTCTTAGGAGATGACAA 29900

29901 AAAAAAATCACATGGGGAT AGCAC 29925

|            |     |                                                     |     |
|------------|-----|-----------------------------------------------------|-----|
| EMBOSS_001 | 1   | MFVFLVLLPLVSSQCVNLTTRTQLPPAYTNSFTRGVYYPDKVFRSSVLHS  | 50  |
| EMBOSS_001 | 1   | MFVFLVLLSLVSSQCVNLTTRTQLPPAYTNSFTRGVYYPDKVFRSSVLHS  | 50  |
| EMBOSS_001 | 51  | TQDLFLPFFSNVTWFHAIHVSNGTKRFDNPVLPFNDGVYFASTEKSNI    | 100 |
| EMBOSS_001 | 51  | TQDLFLPFFSNVTWFHAIHVSNGTKRFDNPVLPFNDGVYFASTEKSNI    | 100 |
| EMBOSS_001 | 101 | IRGWIFGTTLDSTQSLIVNNATNVVIKVFCEQFCNDPFLGVYYHKNNK    | 150 |
| EMBOSS_001 | 101 | IRGWIFGTTLDSTQSLIVNNATNVVIKVFCEQFCNDPFLGVYYHKNNK    | 150 |
| EMBOSS_001 | 151 | SWMESEFRVYSSANNCTFEYVSQPFLMDLEGKQGNFKNLREFVFKNIDGY  | 200 |
| EMBOSS_001 | 151 | SWMESEFRVYSSANNCTFEYVSQPFLMDLEGKQGNFKNLREFVFKNIDGY  | 200 |
| EMBOSS_001 | 201 | FKIYSKHTPINLVRDLPQGFSALEPLVDLPIGINITRFQTLALHRSYLT   | 250 |
| EMBOSS_001 | 201 | FKIYSKHTPINLVRDLPQGFSALEPLVDLPIGINITRLQTLALHRSYLT   | 250 |
| EMBOSS_001 | 251 | PGDSSSGWTAGAAAYVGYLQPRTFLLKYNENGTITDAVDCALDPLSETK   | 300 |
| EMBOSS_001 | 251 | PGDSSSGWTAGAAAYVGYLQPRTFLLKYNENGTITDAVDCALDPLSETK   | 300 |
| EMBOSS_001 | 301 | CTLKSFTVEKGIYQTSNFRVQPTESIVRFPNITNLCPFGEVFNATRFASV  | 350 |
| EMBOSS_001 | 301 | CTLKSFTVEKGIYQTSNFRVQPTESIVRFPNITNLCPFGEVFNATRFASV  | 350 |
| EMBOSS_001 | 351 | YAWNRRKISNCVADYSVLVNSASFSTFKCYGVSPTKLNDLCFTNVYADSF  | 400 |
| EMBOSS_001 | 351 | YAWNRRKISNCVADYSVLVNSASFSTFKCYGVSPTKLNDLCFTNVYADSF  | 400 |
| EMBOSS_001 | 401 | VIRGDEVQRQIAPGQTGKIADYNYKLPPDFTGCVIAWNSNNLDSKVGNGYN | 450 |
| EMBOSS_001 | 401 | VIRGDEVQRQIAPGQTGKIADYNYKLPPDFTGCVIAWNSNNLDSKVGNGYN | 450 |
| EMBOSS_001 | 451 | YLYRLFRKSNLKPFERDISTEIQAGSTPCNGVEGFNCYFPLQSYGFQPT   | 500 |
| EMBOSS_001 | 451 | YLYRLFRKSNLKPFERDISTEIQAGSTPCNGVEGFNCYFPLQSYGFQPT   | 500 |
| EMBOSS_001 | 501 | NGVGYQPYRVVLSFELLHAPATVCGPKKSTNLVKNKCVNFNFNGLTGTG   | 550 |
| EMBOSS_001 | 501 | NGVGYQPYRVVLSFELLHAPATVCGPKKSTNLVKNKCVNFNFNGLTGTG   | 550 |
| EMBOSS_001 | 551 | VLTESNKKFLPFQQFGRDIADTTDAVRDPQTLEILDITPCSFGGVSVITP  | 600 |
| EMBOSS_001 | 551 | VLTESNKKFLPFQQFGRDIADTTDAVRDPQTLEILDITPCSFGGVSVITP  | 600 |

**Figure S1.** Difference of discovered strain 1 spike protein sequence and original strain spike protein sequence

|            |      |                                                     |      |
|------------|------|-----------------------------------------------------|------|
| EMBOSS_001 | 601  | GTNTSNQVAVLYQDVNCTEVPVAIHADQLTPTWRVYSTGSNVFQTRAGCL  | 650  |
| EMBOSS_001 | 601  | ..:                                                 | 650  |
| EMBOSS_001 | 601  | EVDTSNQVAVLYQDVNCTEVPVAIHADQLTPTWRVYSTGSNVFQTRAGCL  | 650  |
| EMBOSS_001 | 651  | IGAETHVNSYECDIPIGAGICASYQTQTNSPRRARSVASQSIIAYTMSLG  | 700  |
| EMBOSS_001 | 651  |                                                     | 700  |
| EMBOSS_001 | 651  | IGAETHVNSYECDIPIGAGICASYQTQTNSPRRARSVASQSIIAYTMSLG  | 700  |
| EMBOSS_001 | 701  | AENSVAYSNNISAIPTNFTISVTTEILPVSMKTSTVDCTMYICGDSSTCS  | 750  |
| EMBOSS_001 | 701  |                                                     | 750  |
| EMBOSS_001 | 701  | AENSVAYSNNISAIPTNFTISVTTEILPVSMKTSTVDCTMYICGDSSTCS  | 750  |
| EMBOSS_001 | 751  | NLLLQYGSFCTQLNRALTGIAVEQDKNTQEVFAQVKQIYKTPPIKDFGGF  | 800  |
| EMBOSS_001 | 751  | .                                                   | 800  |
| EMBOSS_001 | 751  | NLLLQYGSFCTQLNRGLTGIAVEQDKNTQEVFAQVKQIYKTPPIKDFGGF  | 800  |
| EMBOSS_001 | 801  | NFSQILPDPSKPSKRSFIEDLLFNKVTLADAGFIKQYGDCLGDIAARDLI  | 850  |
| EMBOSS_001 | 801  | .                                                   | 850  |
| EMBOSS_001 | 801  | NFSQILPDPSKPSKRSFIEDLLFNKVTLADAGFIKQYGDCLGDIAARDHI  | 850  |
| EMBOSS_001 | 851  | CAQKFNGLTVLPPLLTDEMIAQYTSALLAGTITSGWTFGAGAAALQIPFAM | 900  |
| EMBOSS_001 | 851  |                                                     | 900  |
| EMBOSS_001 | 851  | CAQKFNGLTVLPPLLTDEMIAQYTSALLAGTITSGWTFGAGAAALQIPFAM | 900  |
| EMBOSS_001 | 901  | QMAYRFNGIGVTQNVLYENQKLIANQFNSAIGKIQDSLSTASALGKLQD   | 950  |
| EMBOSS_001 | 901  |                                                     | 950  |
| EMBOSS_001 | 901  | QMAYRFNGIGVTQNVLYENQKLIANQFNSAIGKIQDSLSTASALGKLQD   | 950  |
| EMBOSS_001 | 951  | VVNQNAQALNTLVKQLSSNFGAISSVLNDILSRDKVEAEVQIDRLITGR   | 1000 |
| EMBOSS_001 | 951  |                                                     | 1000 |
| EMBOSS_001 | 951  | VVNQNAQALNTLVKQLSSNFGAISSVLNDILSRDKVEAEVQIDRLITGR   | 1000 |
| EMBOSS_001 | 1001 | LQSLQTYVTQQLIRAAEIRASANLAATKMSECVLGQSKRVDFCGKGYHLM  | 1050 |
| EMBOSS_001 | 1001 | .   ..:                                             | 1050 |
| EMBOSS_001 | 1001 | LQSLQTYVTQQLIRAAEIRASANLAATKMSECVLGQSKRVDFCGKGYHLM  | 1050 |
| EMBOSS_001 | 1051 | SFPQSAPHGVVFLHVTYVPAQEKNFTTAPACHDGAHFPREGVFSNGT     | 1100 |
| EMBOSS_001 | 1051 | .   ..:                                             | 1100 |
| EMBOSS_001 | 1051 | SFPQSAPHGVVFLHVTYVPAQEKNFTTAPAKSDDGAHFPREGVFSNGT    | 1100 |
| EMBOSS_001 | 1101 | HWFVTQRNFYEPQIITDNTFVSGNCDVVIGIVNNTVYDPLQPELDSFKE   | 1150 |
| EMBOSS_001 | 1101 |                                                     | 1150 |
| EMBOSS_001 | 1101 | HWFVTQRNFYEPQIITDNTFVSGNCDVVIGIVNNTVYDPLQPELDSFKE   | 1150 |
| EMBOSS_001 | 1151 | ELDKYFKNHTSPDVLGDISGINASVVNIQKEIDRLNEVAKNLNESLIDL   | 1200 |
| EMBOSS_001 | 1151 | .                                                   | 1200 |
| EMBOSS_001 | 1151 | ELDKYFKNHTSADVDLGDISGINASVVNIQKEIDRLNEVAKNLNESLIDL  | 1200 |
| EMBOSS_001 | 1201 | QELGKYEQYIKWPWYIWLGFIAGLIAIVMVTIMLCMTSCCSCCLKGCCSC  | 1250 |
| EMBOSS_001 | 1201 |                                                     | 1250 |
| EMBOSS_001 | 1201 | QELGKYEQYIKWPWYIWLGFIAGLIAIVMVTIMLCMTSCCSCCLKGCCSC  | 1250 |
| EMBOSS_001 | 1251 | GSCCKFDEDDSEPVLGKVKLHYT                             | 1273 |
| EMBOSS_001 | 1251 |                                                     | 1273 |
| EMBOSS_001 | 1251 | GSCCKFDEDDSEPVLGKVKLHYT                             | 1273 |

**Figure S1.** Difference of discovered strain 1 spike protein sequence and original strain spike protein sequence

|            |     |                                                     |     |
|------------|-----|-----------------------------------------------------|-----|
| EMBOSS_001 | 1   | MFVFLVLLPLVSSQCVNLTTRTQLPPAYTNSFTRGVVYYPDKVFRSSVLHS | 50  |
| EMBOSS_001 | 1   | MFVFLVLLPLVSSQCVNLTTRTQLPKSDTNSFTRGVVYYPDKVFRSSVLHS | 50  |
| EMBOSS_001 | 51  | TQDLFLPFFSNVTWFHAIHVSGTNGTKRFDNPVLPFNDGVYFASTSEKSN  | 100 |
| EMBOSS_001 | 51  | TQDLFLPFFSNVTWFHAIHVSGTNGTKRFDNPVLPFNDGVYFASTSEKSN  | 100 |
| EMBOSS_001 | 101 | IRGWIFGTTLDSTQSLIVNNATNVVIVKCEFCNDPFLGVVYHKNNK      | 150 |
| EMBOSS_001 | 101 | IRGWIFGTTLDSTQSLIVNNATNVVIVKCEFCNDPFLGVVYHKNNK      | 150 |
| EMBOSS_001 | 151 | SWMESEFRVYSSANNCTFEYVSQPFMDLEGKQGNFKNLREFVFNIDGY    | 200 |
| EMBOSS_001 | 151 | SWMESEFRVYSSANNCTFEYVSQPFMDLEGKQGNFKNLREFVFNIDGY    | 200 |
| EMBOSS_001 | 201 | FKIYSKHTPINLVRDLPQGFSALEPLVDLPIGINITRFQTLALHRSYLT   | 250 |
| EMBOSS_001 | 201 | FKIYSKHTPINLVRDLPQGFSALEPLVDLPIGINITRFQTLALHRSYLT   | 250 |
| EMBOSS_001 | 251 | PGDSSSGWTAGAAAYVGYLQPRTFLLKYNENGTITDAVDCALDPLSETK   | 300 |
| EMBOSS_001 | 251 | PGDSSSGWTAGAAAYVGYLQPRTFLLKYNENGTITDAVDCALDPLSETK   | 300 |
| EMBOSS_001 | 301 | CTLKSFTVEKGIYQTSNFRVQPTESIVRFPNITNLCPFGEVFNATRFASV  | 350 |
| EMBOSS_001 | 301 | CTLKSFTVEKGIYQTSNFRVQPTESIVRFPNITNLCPFGEVFNATRFASV  | 350 |
| EMBOSS_001 | 351 | YAWNRRKISNCVADYSVLVNSASFSTFKCYGVSPTKLNDLCFTNVYADSF  | 400 |
| EMBOSS_001 | 351 | YAWNRRKISNCVADYSVLVNSASFSTFKCYGVSPTKLNDLCFTNVYADSF  | 400 |
| EMBOSS_001 | 401 | VIRGDEVQRQIAPGQTGKIADYNYKLPDDFTGCVIAWNSNLDLSDKVGNNY | 450 |
| EMBOSS_001 | 401 | VIRGDEVQRQIAPGQTGKIADYNYKLPDDFTGCVIAWNSNLDLSDKVGNNY | 450 |
| EMBOSS_001 | 451 | YLRLFRKSNLKPFERDISTEIQAGSTPCNGVEGFNCYFPLQSYGFQPT    | 500 |
| EMBOSS_001 | 451 | YLRLFRKSNLKPFERDISTEIQAGSTPCNGVEGFNCYFPLQSYGFQPT    | 500 |
| EMBOSS_001 | 501 | NGVGYPYRVVLSFELLHAPATVCGPKKSTNLVKNKCVNFNFNGLTGTG    | 550 |
| EMBOSS_001 | 501 | NGVGYPYRVVLSFELLHAPATVCGPKKSTNLVKNKCVNFNFNGLTGTG    | 550 |
| EMBOSS_001 | 551 | VLTESNKKFLPFQFGRDIADTTDAVRDPQTLEILDITPCSFGGVSVITP   | 600 |
| EMBOSS_001 | 551 | VLTESNKKFLPFQFGRDIADTTDAVRDPQTLEILDITPCSFGGVSVITP   | 600 |
| EMBOSS_001 | 601 | GTNTSNQVAVLYQDVNCTEVPVAIHADQLTPTWRVYSTGSNVFQTRAGCL  | 650 |
| EMBOSS_001 | 601 | GTNTSNQVAVLYQDVNCTEVPVAIHADQLTPTWRVYSTGSNVFQTRAGCL  | 650 |
| EMBOSS_001 | 651 | IGAHEVNNSEYCDIPIGAGICASYQTQTNSPRRARSVASQSIAYTMSLG   | 700 |
| EMBOSS_001 | 651 | IGAHEVNNSEYCDIPIGAGICASYQTQTNSPRRARSVASQSIAYTMSLG   | 700 |

**Figure S2.** Difference of discovered strain 2 spike protein sequence and original strain spike protein sequence

|            |      |                                                     |      |
|------------|------|-----------------------------------------------------|------|
| EMBOSS_001 | 701  | AENSVAYSNNNSIAIPTNFTISVTTEILPVSMTKTSVDCTMYICGDSTEC  | 750  |
| EMBOSS_001 | 701  | AENSVAYSNNNSIAIPTNFTISVTTEILPVSMTKTSVDCTMYICGDSTEC  | 750  |
| EMBOSS_001 | 751  | NLLQYGSFCTQLNRALTGIAVEQDKNTQEVFAQVKQIYKTPPIKDFGGF   | 800  |
| EMBOSS_001 | 751  | NLLQYGSFCTQLNRALTGIAVEQDKNTQEVFAQVKQIYKTPPIKDFGGF   | 800  |
| EMBOSS_001 | 801  | NFSQILPDPSKPSKRSFIEDLLFNKVTADAGFIKQYGDCLGDIARDLI    | 850  |
| EMBOSS_001 | 801  | NFSQILPDPSKPSKRSFIEDLLFNKVTADAGFIKQYGDCLGDIARDLI    | 850  |
| EMBOSS_001 | 851  | CAQKFNGLTVLPPLTDEMIAQYTSALLAGTITSGWTFGAGAALQIPFAM   | 900  |
| EMBOSS_001 | 851  | CAQKFNGLTVLPPLTDEMIAQYTSALLAGTITSGWTFGAGAALQIPFAM   | 900  |
| EMBOSS_001 | 901  | QMAYRFNGIGVTQNVLYENQKLIANQFNSAIGKIQDSLSTASALGKLQD   | 950  |
| EMBOSS_001 | 901  | QMAYRFNGIGVTQNVLYENQKLIANQFNSAIGKIQDSLSTASALGKLQD   | 950  |
| EMBOSS_001 | 951  | VVNQNAQALNTLVKQLSSNFGAISSVLNDILSRDKVEAEVQIDRLITGR   | 1000 |
| EMBOSS_001 | 951  | VVNQNAQALNTLVKQLSSNFGAISSVLNDILSRDKVEAEVQIDRLITGR   | 1000 |
| EMBOSS_001 | 1001 | LQSLQTYVTQQLIRAAEIRASANLAATKMSECVLGQSKRVDFCGKGYHLM  | 1050 |
| EMBOSS_001 | 1001 | LQSLQTYVTQQLIRAAEIRASANLAATKMSECVLGQSKRVDFCGKGYHLM  | 1050 |
| EMBOSS_001 | 1051 | SFPQSAPHGVVFLHVTYVPAQEKNF TTAPAICHDGKAHFPREGVFVSNGT | 1100 |
| EMBOSS_001 | 1051 | SFPQSAPHGVVFLHVTYVPAQEKNF TTAPAICHDGKAHFPREGVFVSNGT | 1100 |
| EMBOSS_001 | 1101 | HWFVTQRNFYEPQIITTDNTFVSGNCDVVIGIVNNTVYDPLQPELDSFKE  | 1150 |
| EMBOSS_001 | 1101 | HWFVTQRNFYEPQIITTDNTFVSGNCDVVIGIVNNTVYDPLQPELDSFKE  | 1150 |
| EMBOSS_001 | 1151 | ELDKYFKNHTSPDVLGDISGINASVVNIQKEIDRLNEVAKNLNESLIDL   | 1200 |
| EMBOSS_001 | 1151 | ELDKYFKNHTSPDVLGDISGINASVVNIQKEIDRLNEVAKNLNESLIDL   | 1200 |
| EMBOSS_001 | 1201 | QELGKYEQYIKWPWYIWLGF IAGLIAIVMVTIMLCMTSCCCLKGCCSC   | 1250 |
| EMBOSS_001 | 1201 | QELGKYEQYIKWPWYIWLGF IAGLIAIVMVTIMLCMTSCCCLKGCCSC   | 1250 |
| EMBOSS_001 | 1251 | GSCCKFDEDDSEPVLKGVKLHYT                             | 1273 |
| EMBOSS_001 | 1251 | GSCCKFDEDDSEPVLKGVKLHYT                             | 1273 |

**Figure S2.** Difference of discovered strain 2 spike protein sequence and original strain spike protein sequence

|            |     |                                                     |     |
|------------|-----|-----------------------------------------------------|-----|
| EMBOSS_001 | 1   | MFLTTKRTMFVFLVLLPLVSSQCVNLTRTQLPPAYTNSFTRGVVYPDK    | 50  |
| EMBOSS_001 | 1   | MFLTTIIRTMFVFLVLLPLVSSQCVNLKSRQLPPAYTNSFTRGVVYPGK   | 50  |
| EMBOSS_001 | 51  | VFRSSVLHSTQDLFLPFFSNVTWFHAIHVSQNGTKRFDNPVLPFNDGVY   | 100 |
| EMBOSS_001 | 51  | VFRSSVLHSTQDLFLPFFSNVTWFHAIHVSQIGTKRFDNPVLPFNDGVY   | 100 |
| EMBOSS_001 | 101 | FASTEKSNIIRGWIFGTTLDSKTQSLIVNNATNVVIKVEFCQFCNDPFL   | 150 |
| EMBOSS_001 | 101 | FASTEKSIIIRGWIFGTTLDSKTQSLIVNNSTNVVIKVEFCQFCNDPFL   | 150 |
| EMBOSS_001 | 151 | GVYYHKNNKSWMESEFRVYSSANNCTFEYVSQPFLLMDLEGKQGNFKNLRE | 200 |
| EMBOSS_001 | 151 | GVYYHKNNKSWMESEFRVYSSANNCTFE-VSQPFLLMDLEGKQGNFKNLRE | 199 |
| EMBOSS_001 | 201 | FVFKNIDGYFKIYSKHTPINLVRDLPGGFSALEPLVDLPIGINITRFQTL  | 250 |
| EMBOSS_001 | 200 | FVFKNIDGYFKIYSKHTPINLVRDLPGGFSALEPLVDLPIGINITRFQII  | 249 |
| EMBOSS_001 | 251 | LALHRSYLTPGDSSSGWTAGAAAYVGYLQPRTFLLKYNENGTITDAVDC   | 300 |
| EMBOSS_001 | 250 | LSLHRSYLTPGDSSSGWTAGAAAYVGYLQPRSFLLKYNENGTITDAVDC   | 299 |
| EMBOSS_001 | 301 | ALDPLSEKCTLKSTVEKGIYQTSNFRVQPTESIVRFPNITNLCPFGEV    | 350 |
| EMBOSS_001 | 300 | ALDPLSGKCTLKSTVEKGIYQTSNFRVQPTESIVRFPNIKYLCPFGEV    | 349 |
| EMBOSS_001 | 351 | FNATRFASVYAWNRKRISNCVADYSVLVNSASFSTFKCYGVSPTKLNDLC  | 400 |
| EMBOSS_001 | 350 | FNATRFASVYAWNRKRISNCVADYSVLVNSVPFSTFKCYGVSPTKLNDLC  | 399 |
| EMBOSS_001 | 401 | FTNVYADSFVIRGDEVQRQIAPGQTGKIADYNYKLPDDFTGCVIAWNSNNL | 450 |
| EMBOSS_001 | 400 | FTNVYADSFVIRGDEVQRQIAPGQTGKIADYNYKLPDDFTGCVIAWNSNNL | 449 |
| EMBOSS_001 | 451 | DSKVGGNVNYLYRLFRKSNLKPFERDISTEIQAGSTPCNGVEGFNCYFP   | 500 |
| EMBOSS_001 | 450 | DSKVGGNVNYLYRLFRKSNLKPFERDISTEIQAGSTPCNGVEGFNCYFL   | 499 |
| EMBOSS_001 | 501 | LQSYGFQPTNGVGYQPYRVVLSFELLHAPATVCGPKKSTNLVKNKCVNF   | 550 |
| EMBOSS_001 | 500 | LQLYGFQPTNGVGYQPYRVVLSFELLHAPATVCASKKSTNLVKNKCVNF   | 549 |
| EMBOSS_001 | 551 | NFNGLTGTGVLTESNKKFLPFQFGRDIADT-----TDAVRDPQTLEI     | 593 |
| EMBOSS_001 | 550 | NFNGLTGTGVLTESNKSFLF----NNLAETLLTLLMLSEVHRHLRFTL    | 595 |
| EMBOSS_001 | 594 | LDITPCSFGGVSVITP-----GTNTSNQVAVLYQGVNCTEVPV         | 631 |
| EMBOSS_001 | 596 | HHVLLV----VSVLRQEQLLTRLLFFIRVSTAQKSLLLFMQINLLLLGV   | 641 |
| EMBOSS_001 | 632 | AIHADQLTPTWRVYSTGSMVFQTRAGCLIGAHEVMNSYECDIPIGAGICA  | 681 |
| EMBOSS_001 | 642 | FI-LQVLKFLKHVQAVGLNMSTT-----HMSVTY----PL-----       | 671 |
| EMBOSS_001 | 682 | SYQTQTNSPRRARSVASQSIIAYTMSLGAENSVAYSNNSIAIPTNFTISV  | 731 |
| EMBOSS_001 | 672 | -VQVYALVIRLSLILLGGHVVLNPSL---HSLCHLVQKIQLLTLITLLP   | 717 |

**Figure S3.** Difference of MR discovered strain 1 spike protein sequence and the MR assembled contig spike protein sequence



|            |      |                                                      |      |
|------------|------|------------------------------------------------------|------|
| EMBOSS_001 | 732  | TTEILPVSMTK-----TSVDCT-----MYICGDSTECNLLLL           | 763  |
| EMBOSS_001 | 718  | YPQILLLLVLPQKFYQCLPRHQIVQCTFGMIQLNAAIYCCNMAVFNHTVL   | 767  |
| EMBOSS_001 | 764  | QYGSFCTQLNRALTGIAVEQDKNTQEVFAQVK-----QIYKTPP-        | 802  |
| EMBOSS_001 | 768  | -----LELLNKTPTPKKFVHKSNKFTKHHQLKILVVLIFHKFQIHQNQAR   | 812  |
| EMBOSS_001 | 803  | ---IKDFGGFNFSQILPDPSKPSKRSFIEDLLFNKVTLADAGFIKQYGDC   | 849  |
| EMBOSS_001 | 813  | GHLKIKYFSTKHLQLL-----ASSNNMVIALV---ILLLEPSFVHK----   | 850  |
| EMBOSS_001 | 850  | LGDIAARDLICAQKFNGLTVLPPLLTDEMIAYQTSALLAGTITS-----    | 893  |
| EMBOSS_001 | 851  | ----SLTALLFCHLCSQIRLLNTLLHCRVL-----SLLVGPLVQVLHYKY   | 891  |
| EMBOSS_001 | 894  | ----GWTFGAGA-ALQIPFAMQ-----MAYRFNGIGVTQMWLYEN        | 928  |
| EMBOSS_001 | 892  | HVLCKWLIGLVMVLELHRMFSMRTKNLPTNLIVLLAKFKTHFLPQQANLEN  | 941  |
| EMBOSS_001 | 929  | QKLIANQFNISAIGKIQDSLSTASALGKLDQVNVNQAQALNTLVKQLSSN   | 978  |
| EMBOSS_001 | 942  | FKM---WSTKMHKLTRLNNLAPILVQFQ-----                    | 967  |
| EMBOSS_001 | 979  | FGAISSVLNDILSRDLKVEAEVQIDRLITGRQLSLQTY-VTQQLIRAAEI   | 1027 |
| EMBOSS_001 | 968  | ---VFMISFHVLTKL-----RLCKKLIGSQADFNVCRHMLNNLEL        | 1004 |
| EMBOSS_001 | 1028 | RASANLAATKMSEC---VLGQSKRVDFCGKGYHLMSPQASAPHGVWF---   | 1071 |
| EMBOSS_001 | 1005 | QKSELLILLLLLCNSQSVYLDNQKELIFVERA---IILCPSLSQHLMMFSCM | 1052 |
| EMBOSS_001 | 1072 | ---LH-----VTYVPAQEKNFITAPAI---CHDGKAHFPREGVFSN       | 1107 |
| EMBOSS_001 | 1053 | LMSLHKKRTSQLLLPFV-MMEHTFLVKVSLFQMAHTGL----HKGIFMNH   | 1097 |
| EMBOSS_001 | 1108 | -----GTHWF-----VTQRNFYEPQIITTDNTFVSGNCDVVIGIVNN-     | 1144 |
| EMBOSS_001 | 1098 | KSLLQTTHLCVTVMLLEVSTTQF---MILCNLNTHSRRSIN-ILRIIHQ    | 1143 |
| EMBOSS_001 | 1145 | -TVYDPLQPELD-SFKEELDKYFKNHTSPDVDLGDISGINASVVNIQKEI   | 1192 |
| EMBOSS_001 | 1144 | MLIVTSLALMLQLTYKKKL-----TASMRLQI                     | 1170 |
| EMBOSS_001 | 1193 | DRLNEVAKNLN--ESLIDLQELGK-----YEQYIKWPW               | 1223 |
| EMBOSS_001 | 1171 | MNLSSISKNLSESMSSIMAMVHLARFYSWLDCHSNGDNYALLYDQLLSQG   | 1220 |
| EMBOSS_001 | 1224 | YIWLGFIAGLIAIV----MVTIMLCMTSCCSCCLKGCCSCGSCCKFDED    | 1268 |
| EMBOSS_001 | 1221 | LLFLGILLQIRRLASAQRSQITLHI-----                       | 1245 |
| EMBOSS_001 | 1269 | DSEPVLKGVKLHYT                                       | 1282 |
| EMBOSS_001 | 1246 |                                                      | 1245 |

|            |     |                                                     |     |
|------------|-----|-----------------------------------------------------|-----|
| EMBOSS_001 | 1   | MFLTTKRTMFVFLVLLPLVSSQCVNLTTRTQLPPAYTNSFTRGVYYPDK   | 50  |
| EMBOSS_001 | 1   | MFLTTKRTMFVFLVLLPLDSSQCVNLTTRTQLPPAYTNSFTRGVYYPDK   | 50  |
| EMBOSS_001 | 51  | VFRSSVLHSTQDLFLPFFSNVTWFHAIHVSNGTKRFDNPVLPFNDGVY    | 100 |
| EMBOSS_001 | 51  | VFRSSVLHSTQDLFLPFFSNVTWFHAIHVSNGTKRFDNPVLPFNDGVY    | 100 |
| EMBOSS_001 | 101 | FASTEKSNIIRGWIFGTTLDSTQSLIVNNATNVVIVKVFCEQFCNDPFL   | 150 |
| EMBOSS_001 | 101 | FASTEKSNIIRGWIFGTTLDSTQSLIVNNATNVVIVKVFCEQFCNDPFL   | 150 |
| EMBOSS_001 | 151 | GVYYHKNNKSWMESEFRVYSSANNCTFEYVSQPF LMDLEGKQGNFKNLRE | 200 |
| EMBOSS_001 | 151 | GVYYHKNNKSWMESEFRVYSSANNCTFEYVSQPF LMDLEGKQGNFKNLRE | 200 |
| EMBOSS_001 | 201 | FVFKNIDGYFKIYSKHTPINLVRDLPQGFSALEPLVDLPIGINITRFQTL  | 250 |
| EMBOSS_001 | 201 | FVFKNIDGYFKIYSKHTPINLVRDLPQGFSALEPLVDLPIGINITRFQTL  | 250 |
| EMBOSS_001 | 251 | LALHRSYLT PGDSSSGWTAGAAAYVGYLQPRTFLLKYNENGTITDAVDC  | 300 |
| EMBOSS_001 | 251 | LALHRSYLT PGDSSSGWTAGAAAYVGYLQPRTFLLKYNENGTITDAVDC  | 300 |
| EMBOSS_001 | 301 | ALDPLSEKCTLSFTVEKGIYQTSNFRVQPTESIVRFPNITNLCPFGEV    | 350 |
| EMBOSS_001 | 301 | ALDPLSEKCTLSFTVEKGIYQTSNFRVQPTESIVRFPNITNLCPFGEV    | 350 |
| EMBOSS_001 | 351 | FNATRFASVYAHNRKRISNCVADYSVLVNSASFSTFKCYGVSPKLNCLC   | 400 |
| EMBOSS_001 | 351 | FNATRFASVYAHNRKRISNCVADYSVLVNSASFSTFKCYGVSPKLNCLC   | 400 |
| EMBOSS_001 | 401 | FTNVYADSFVIRGDEVQRQIAPGQTGKIADYNYKLPDDFTGCVIAWNSNNL | 450 |
| EMBOSS_001 | 401 | FTNVYADSFVIRGDEVQRQIAPGQTGKIADYNYKLPDDFTGCVIAWNSNNL | 450 |
| EMBOSS_001 | 451 | DSKVGGNMYLYRLFRKSNLKPFERDISTEIQAGSTPCNGVEGFNCYFP    | 500 |
| EMBOSS_001 | 451 | DSKVGGNMYLYRLFRKSNLKPFERDISTEIQAGSTPCNGVEGFNCYFP    | 500 |
| EMBOSS_001 | 501 | LQSYGFQPTNGVGYQPYRVVLSFELLHAPATVCGPKKSTNLVKNKCVNF   | 550 |
| EMBOSS_001 | 501 | LQSYGFQPTNGVGYQPYRVVLSFELLHAPATVCGPKKSTNLVKNKCVNF   | 550 |
| EMBOSS_001 | 551 | NFNGLTGTGVLTESNKKFLPFQFGRDIADTTDAVRDPQTL EILDITPCS  | 600 |
| EMBOSS_001 | 551 | NFNGLTGTGVLTESNKKFLPFQFGRDIADTTDAVRDPQTL EILDITPCS  | 600 |
| EMBOSS_001 | 601 | FGGVSVITPGTNTSNQVAVLYQGVNCTEVPVAIHADQLTPTWRVYSTGSN  | 650 |
| EMBOSS_001 | 601 | FGGVSVITPGTNTSNQVAVLYQGVNCTEVPVAIHADQLTPTWRVYSTGSN  | 650 |
| EMBOSS_001 | 651 | VFQTRAGCLIGAHEVMNSYECDIPIGAGICASYQTQTNSPRRARSVASQS  | 700 |
| EMBOSS_001 | 651 | VFQTRAGCLIGAHEVMNSYECDIPIGAGICASYQTQTNSPRRARSVASQS  | 700 |
| EMBOSS_001 | 701 | IIAYTMSLGAENSVAYSNNIAIPTNFTISVTTEILPVSMKTSTVDCTMY   | 750 |
| EMBOSS_001 | 701 | IIAYTMSLGAENSVAYSNNIAIPTNFTISVTTEILPVSMKTSTVDCTMY   | 750 |

**Figure S4.** Difference of MR discovered strain 2 spike protein sequence and MR assembled contig spike protein sequence

|            |      |                                                    |      |
|------------|------|----------------------------------------------------|------|
| EMBOSS_001 | 751  | ICGDSTECSNLLQYGSFCTQLNRALTGIAVEQDKNTQEVFAQVKQIYKT  | 800  |
| EMBOSS_001 | 751  |                                                    | 800  |
| EMBOSS_001 | 751  | ICGDSTECSNLLQYGSFCTQLNRALTGIAVEQDKNTQEVFAQVKQIYKT  | 800  |
| EMBOSS_001 | 801  | PPIKDFGGFNFSQILPDPSKPSKRSFIEDLLFNKVTLADAGFIKQYGDCL | 850  |
| EMBOSS_001 | 801  |                                                    | 850  |
| EMBOSS_001 | 801  | PPIKDFGGFNFSQILPDPSKPSKRSFIEDLLFNKVTLADAGFIKQYGDCL | 850  |
| EMBOSS_001 | 851  | GDIAARDLICAQKFNGTLVLPPLLTDEMIAQYTSALLAGTITSGWTFGAG | 900  |
| EMBOSS_001 | 851  |                                                    | 900  |
| EMBOSS_001 | 851  | GDIAARDLICAQKFNGTLVLPPLLTDEMIAQYTSALLAGTITSGWTFGAG | 900  |
| EMBOSS_001 | 901  | AALQIPFAMQMAYRFNGIGVTQNVLYENQKLIANQFNSAIGKIQDLSST  | 950  |
| EMBOSS_001 | 901  |                                                    | 950  |
| EMBOSS_001 | 901  | AALQIPFAMQMAYRFNGIGVTQNVLYENQKLIANQFNSAIGKIQDLSST  | 950  |
| EMBOSS_001 | 951  | ASALGKLQDVVNQNAQALNTLVKQLSSNFGAISSVLNDILSRDKVEAEV  | 1000 |
| EMBOSS_001 | 951  |                                                    | 1000 |
| EMBOSS_001 | 951  | ASALGKLQDVVNQNAQALNTLVKQLSSNFGAISSVLNDILSRDKVEAEV  | 1000 |
| EMBOSS_001 | 1001 | QIDRLITGRLQSLQTYVTQQLIRAAEIRASANLAATKMSECVLGQSKRVD | 1050 |
| EMBOSS_001 | 1001 |                                                    | 1050 |
| EMBOSS_001 | 1001 | QIDRLITGRLQSLQTYVTQQLIRAAEIRASANLAATKMSECVLGQSKRVD | 1050 |
| EMBOSS_001 | 1051 | FCGKGYHLSFPQSAPHGVVFLHVTYVPAQEKNFTTAPAICHGDKAHFPR  | 1100 |
| EMBOSS_001 | 1051 |                                                    | 1100 |
| EMBOSS_001 | 1051 | FCGKGYHLSFPQSAPHGVVFLHVTYVPAQEKNFTTAPAICHGDKAHFPR  | 1100 |
| EMBOSS_001 | 1101 | EGVFVSNQTHWVFVTRNFYEPQIITDNTFVSGNCDVWIGIVNNTVYDPL  | 1150 |
| EMBOSS_001 | 1101 |                                                    | 1150 |
| EMBOSS_001 | 1101 | EGVFVSNQTHWVFVTRNFYEPQIITDNTFVSGNCDVWIGIVNNTVYDPL  | 1150 |
| EMBOSS_001 | 1151 | QPELDSFKEELDKYFKNHTSPDVLGDISGINASVNIQKEIDRLNEVAK   | 1200 |
| EMBOSS_001 | 1151 |                                                    | 1200 |
| EMBOSS_001 | 1151 | QPELDSFKEELDKYFKNHTSPDVLGDISGINASVNIQKEIDRLNEVAK   | 1200 |
| EMBOSS_001 | 1201 | NLNEIDLQELGKYEQYIKWPWYIWLGFIAGLIAIMVTIMLCCMTSCC    | 1250 |
| EMBOSS_001 | 1201 |                                                    | 1250 |
| EMBOSS_001 | 1201 | NLNEIDLQELGKYEQYIKWPWYIWLGFIAGLIAIMVTIMLCCMTSCC    | 1250 |
| EMBOSS_001 | 1251 | SCLKGCCSCGSCCKFDEDDSEPVKGVKLHYT                    | 1282 |
| EMBOSS_001 | 1251 |                                                    | 1282 |
| EMBOSS_001 | 1251 | SCLKGCCSCGSCCKFDEDDSEPVKGVKLHYT                    | 1282 |

**Figure S4.** Difference of MR discovered strain 2 spike protein sequence and MR assembled contig spike protein sequence
